# Supplementary material for: Orbital Metastases: A Systematic Review of Clinical Characteristics, Management Strategies, and Treatment Outcomes
Source: MDPI journal article supplement (doi:10.3390/cancers14010094), 2021-12-24
Supplement: s1 [file s1]

Table S1. Overview of all included studies.

| Author – Year                        | Study design- Level of evidence | Patients No./ Female | Age years median (range) | Primary Tumors No. patients (percentage)                                                                                                                                                    | Interval between Primary & metastases months, median (range) | Laterality No. patients (percentage) | Localization within the Orbit No. patients (percentage)                     | Tissue infiltrated No. patients (percentage)          | Intracranial extension No. patients (percentage) | Symptoms No. patients (percentage) | Imaging features No. patients (percentage) | Extent of surgery No. patients (percentage) | Surgical technique No. patients (percentage) | Chemo therapy No. patients (percentage) | Orbital Radio therapy No. patients (percentage) median (Gy) | Other therapy No. patients (percentage) | Clinical Improve- ment No. patients (percentage) | RANO response No. patients (percentage) | Recurrence orbital metastases No. patients (percentage) | PFS months, median (range) | OS months, median (range) | Alive No. patients (percentage) |
|--------------------------------------|---------------------------------|----------------------|--------------------------|---------------------------------------------------------------------------------------------------------------------------------------------------------------------------------------------|--------------------------------------------------------------|--------------------------------------|-----------------------------------------------------------------------------|-------------------------------------------------------|--------------------------------------------------|------------------------------------|--------------------------------------------|---------------------------------------------|----------------------------------------------|-----------------------------------------|-------------------------------------------------------------|-----------------------------------------|--------------------------------------------------|-----------------------------------------|---------------------------------------------------------|----------------------------|---------------------------|---------------------------------|
| Arnett et al. 1965 <sup>1</sup>      | Case Report – V                 | 1 / 1                | 64                       | Breast                                                                                                                                                                                      | 0                                                            | R                                    | Superior                                                                    | Soft Tissue                                           | 0                                                | Mass, Pt                           | N/A                                        | Biopsy                                      | N/A                                          | 0                                       | 1                                                           | Hormonal                                | No                                               | PD                                      | 0                                                       | 2.0                        | 2.0                       | 1                               |
| Chatterjee et al. 1965 <sup>2</sup>  | Case Report – V                 | 1 / 0                | 40                       | CUP                                                                                                                                                                                         | 0                                                            | L                                    | Superior                                                                    | Soft Tissue                                           | 0                                                | D, Pro, Pt, RE, S                  | N/A                                        | Complete                                    | Exenteration                                 | 0                                       | 0                                                           | 0                                       | Yes                                              | N/A                                     | 0                                                       | 1.0                        | 1.0                       | 0                               |
| Mortada et al. 1968 <sup>3</sup>     | Case Series – IV                | 10 / 5 (50%)         | 46.5 (25-55)             | 3 Breast (30%),<br>2 Skin (20%),<br>1 (10%) Liver, Lung, Muscle, Prostate, Thyroid                                                                                                          | 12.0 (6-24)                                                  | 7 R (70%),<br>3 L (30%)              | 6 Superior (60%)<br>2 Posterior (20%)<br>1 Medial (10%)<br>1 Inferior (10%) | 7 Muscle (70%)<br>2 Soft Tissue (20%)<br>1 Bone (10%) | 0                                                | 10 Pro (100%)                      | N/A                                        | 10 Biopsy (100%)                            | N/A                                          | N/A                                     | 10 (100%)                                                   | 0                                       | 0                                                | 10 PR (100%)                            | 0                                                       | 12.0 (6-36)                | 12.0 (6-36)               | 0                               |
| Honrubia et al. 1971 <sup>4</sup>    | Case Report – V                 | 1 / 1                | 74                       | Carcinoid                                                                                                                                                                                   | 48.0                                                         | B                                    | Inferolateral                                                               | Soft Tissue                                           | 0                                                | D, Mass                            | N/A                                        | Biopsy                                      | N/A                                          | 0                                       | 0                                                           | 0                                       | 0                                                | N/A                                     | 0                                                       | 24.0                       | 24.0                      | 1                               |
| Ashton et al. 1974 <sup>5</sup>      | Case Series – IV                | 2 / 2                | 53.5 (49-58)             | 2 Breast (100%)                                                                                                                                                                             | 0.0                                                          | 2 R (100%)                           | 1 Posterior (10%)<br>1 Superior (10%)                                       | 1 Muscle (10%)<br>1 Soft Tissue (10%)                 | 0                                                | 2 Pt (100%),<br>1 S (50%)          | N/A                                        | 1 Biopsy (50%)<br>1 Partial (50%)           | N/A                                          | 0                                       | 0                                                           | 0                                       | N/A                                              | N/A                                     | 0                                                       | 54.0 (30-78)               | 54.0 (30-78)              | 0                               |
| Huh et al. 1974 <sup>6</sup>         | Case Series – IV                | 70 / 50 (71.4%)      | 51                       | 28 Breast (40%)<br>23 Bone (32.8%)<br>5 Melanoma (7.1%)<br>3 Lung (4.3%)<br>3 Prostate (4.3%)<br>3 Salivary (4.3%)<br>2 CUP (2.8%)<br>1 Colon (1.4%)<br>1 Thyroid (1.4%)<br>1 Tongue (1.4%) | 58.0                                                         | 9 B (12.8%)                          | N/A                                                                         | N/A                                                   | N/A                                              | HA, ICH, MI, SpI                   | 12 Osteolytic (17.1%)                      | 70 Biopsy (100%)                            | N/A                                          | 0                                       | 70 (100%)                                                   | 0                                       | 50 (71.4%)                                       | N/A                                     | 0                                                       | 6.0 (1-60)                 | 6.0 (1-60)                | 4 (5.7%)                        |
| Saxena et al. 1975 <sup>7</sup>      | Case Report – V                 | 1 / 1                | 60                       | Salivary Gland                                                                                                                                                                              | 7.0                                                          | R                                    | Posterior                                                                   | Muscle                                                | 0                                                | DV, Pro                            | N/A                                        | Complete                                    | Exenteration                                 | 0                                       | 0                                                           | 0                                       | 0                                                | N/A                                     | 1                                                       | 12.0                       | 18.0                      | 1                               |
| Usui et al. 1975 <sup>8</sup>        | Case Report – V                 | 1 / 0                | 79                       | Prostate                                                                                                                                                                                    | 0                                                            | L                                    | N/A                                                                         | N/A                                                   | 0                                                | D, Pro                             | N/A                                        | Biopsy                                      | N/A                                          | 0                                       | 0                                                           | Hormonal                                | 1                                                | N/A                                     | 0                                                       | 5.0                        | 5.0                       | 0                               |
| Balestrazzi et al. 1976 <sup>9</sup> | Case Report – V                 | 1 / 0                | 59                       | Melanoma                                                                                                                                                                                    | 35.0                                                         | R                                    | Medial                                                                      | Soft Tissue                                           | 0                                                | Mass                               | N/A                                        | Complete                                    | N/A                                          | 1                                       | 0                                                           | 0                                       | 1                                                | CR                                      | 0                                                       | 72.0                       | 72.0                      | 1                               |
| Howard et al. 1978 <sup>10</sup>     | Case Report – V                 | 1 / 0                | 47                       | Kidney                                                                                                                                                                                      | 0                                                            | R                                    | Superolateral                                                               | Bone                                                  | 0                                                | D, IM, Mass, Pro, S                | Osteolytic                                 | Partial                                     | N/A                                          | 0                                       | 1, 35 Gy                                                    | Immunothera<br>py                       | 1                                                | CR                                      | 0                                                       | 9.0                        | 9.0                       | 1                               |
| Stewart et al. 1978 <sup>11</sup>    | Case Report – V                 | 1 / 0                | 47                       | Soft Tissue                                                                                                                                                                                 | 144.0                                                        | L                                    | Lateral                                                                     | Soft Tissue                                           | 0                                                | D, IM, OP                          | N/A                                        | Partial                                     | N/A                                          | 1                                       | 0                                                           | 0                                       | 0                                                | PD                                      | 0                                                       | 6.0                        | 6.0                       | 1                               |
| Bullock et al. 1980 <sup>12</sup>    | Case Report – V                 | 1 / 1                | 69                       | Breast                                                                                                                                                                                      | 84.0                                                         | R                                    | Inferomedial                                                                | Soft Tissue                                           | 0                                                | DV, IM                             | N/A                                        | Biopsy                                      | N/A                                          | 0                                       | 1                                                           | Hormonal                                | 1                                                | PR                                      | 0                                                       | 3.0                        | 3.0                       | 1                               |
| Lubin et al. 1980 <sup>13</sup>      | Case Report – V                 | 1 / 0                | 69                       | Liver                                                                                                                                                                                       | 0                                                            | R                                    | Superolateral                                                               | Soft Tissue                                           | 0                                                | Pro                                | N/A                                        | Biopsy                                      | N/A                                          | 0                                       | 1, 30 Gy                                                    | 0                                       | 1                                                | PR                                      | 0                                                       | 1.0                        | 1.0                       | 1                               |
| Rush et al. 1980 <sup>14</sup>       | Case Report – V                 | 1 / 1                | 58                       | Colorectal                                                                                                                                                                                  | 1.0                                                          | L                                    | Lateral                                                                     | Soft Tissue                                           | 0                                                | IM, Pro                            | N/A                                        | Biopsy                                      | N/A                                          | 0                                       | 1, 35 Gy                                                    | 0                                       | 1                                                | PR                                      | 0                                                       | 1.0                        | 1.0                       | 1                               |
| Sobol et al. 1980 <sup>15</sup>      | Case Report – V                 | 1 / 0                | 48                       | Melanoma                                                                                                                                                                                    | 72.0                                                         | R                                    | Inferolateral                                                               | Soft Tissue                                           | 0                                                | DV, IM, Pro                        | N/A                                        | Partial                                     | N/A                                          | 0                                       | 0                                                           | 0                                       | 1                                                | N/A                                     | 0                                                       | 6.0                        | 6.0                       | 0                               |
| Rush et al. 1981 <sup>16</sup>       | Case Report – V                 | 1 / 0                | 28                       | Testes                                                                                                                                                                                      | 27.0                                                         | L                                    | Posterior                                                                   | Soft Tissue                                           | 1                                                | DV, OP, Pro                        | N/A                                        | Biopsy                                      | Decompressi<br>on                            | 0                                       | 1, 30 Gy                                                    | 0                                       | 1                                                | PR                                      | 0                                                       | 1.0                        | 1.0                       | 1                               |
| Winkler et al. 1981 <sup>17</sup>    | Case Report – V                 | 1 / 0                | 59                       | Prostate                                                                                                                                                                                    | 0                                                            | L                                    | Posterior                                                                   | Soft Tissue                                           | 1                                                | IM, Pro, RAPD, VL                  | Osteolytic                                 | Biopsy                                      | Decompressi<br>on                            | 0                                       | 0                                                           | 0                                       | 1                                                | N/A                                     | 0                                                       | 2.0                        | 2.0                       | 1                               |
| Wolter et al. 1981 <sup>18</sup>     | Case Report – V                 | 1 / 0                | 77                       | Prostate                                                                                                                                                                                    | 60.0                                                         | R                                    | Medial                                                                      | Bone                                                  | 0                                                | D, DV, IM, Pro                     | Osteoblastic                               | Partial                                     | N/A                                          | 0                                       | 1                                                           | Hormonal                                | 1                                                | N/A                                     | 0                                                       | 21.0                       | 21.0                      | 1                               |
| Zubler et al. 1981 <sup>19</sup>     | Case Report – V                 | 1 / 0                | 64                       | Liver                                                                                                                                                                                       | 0                                                            | L                                    | Posterior                                                                   | Soft Tissue                                           | 1                                                | Mass, Pro, VL                      | Osteolytic                                 | Biopsy                                      | N/A                                          | 1                                       | 1, 40 Gy                                                    | 0                                       | 0                                                | PR                                      | 0                                                       | 3.0                        | 3.0                       | 0                               |

|                                              |                  |               |              |                    |               |                            |                                                                                                         |                                                           |     |                                                                                                         |                                             |                                                             |                        |           |                  |                  |           |                                            |           |              |              |           |
|----------------------------------------------|------------------|---------------|--------------|--------------------|---------------|----------------------------|---------------------------------------------------------------------------------------------------------|-----------------------------------------------------------|-----|---------------------------------------------------------------------------------------------------------|---------------------------------------------|-------------------------------------------------------------|------------------------|-----------|------------------|------------------|-----------|--------------------------------------------|-----------|--------------|--------------|-----------|
| <b>Carriere et al. 1982</b> <sup>20</sup>    | Case Report – V  | 1 / 0         | 79           | Prostate           | 0             | B                          | Diffuse                                                                                                 | Soft Tissue                                               | 0   | DV, IM, Pro, RAPD                                                                                       | N/A                                         | Biopsy                                                      | N/A                    | 0         | 0                | Hormonal         | 0         | N/A                                        | 0         | 1.0          | 1.0          | 1         |
| <b>Riddle et al. 1982</b> <sup>21</sup>      | Case Series – IV | 7 / 4 (57.1%) | 66 (51-71)   | 7 Carcinoid (100%) | 18.0 (12-60)  | N/A                        | N/A                                                                                                     | N/A                                                       | N/A | 5 Pro (71.4%), 1 D (14.3%), 1 Mass (14.3%)                                                              | N/A                                         | 3 Biopsy (42.9%)<br>3 Complete (42.9%)<br>1 Partial (14.3%) | 3 Exenteration (42.9%) | 0         | 0                | 0                | N/A       | N/A                                        | 0         | 48.0 (4-108) | 48.0 (4-108) | 1 (14.3%) |
| <b>Tertzakian et al. 1982</b> <sup>22</sup>  | Case Series – IV | 2 / 0         | 64 (62-66)   | 2 Prostate (100%)  | 15.5 (0-31)   | 1 L (50%)<br>1 R (50%)     | 1 Lateral (50%)<br>1 Superior (100%)                                                                    | 2 Bone (100%)                                             | N/A | 1 D, Pro (50%)<br>1 No sympt (50%)                                                                      | N/A                                         | 1 FNAB (50%)<br>1 Biopsy (50%)                              | N/A                    | 1 (50%)   | 1 (50%)          | 1 Hormonal (50%) | 0         | PD                                         | 0         | 6.0 (3-9)    | 6.0 (3-9)    | 1 (50%)   |
| <b>Weitberg et al. 1983</b> <sup>23</sup>    | Case Report – V  | 1 / 1         | 55           | CUP                | 0             | L                          | Medial                                                                                                  | Bone                                                      | 0   | D, IM, Mass                                                                                             | N/A                                         | Biopsy                                                      | N/A                    | 1         | 1, 40 Gy         | 0                | 1         | PR                                         | 0         | 12.0         | 12.0         | 1         |
| <b>Mortada et al. 1984</b> <sup>24</sup>     | Case Series – IV | 3 / 3 (100%)  | 55 (53-56)   | 3 Breast (100%)    | 72.0 (60-84)  | 2 L (66.7%)<br>1 R (33.3%) | 1 Medial (33.3%)<br>1 Lateral (33.3%)<br>1 Superior (33.3%)                                             | 3 Muscle (100%)                                           | 0   | 3 D (100%)<br>3 DV (100%)                                                                               | N/A                                         | 3 Biopsy (100%)                                             | N/A                    | 3 (100%)  | 3, 40 Gy         | 0                | N/A       | N/A                                        | 0         | 36.0         | 36.0         | 3 (100%)  |
| <b>Reifler et al. 1984</b> <sup>25</sup>     | Case Report – V  | 1 / 0         | 74           | Prostate           | 13.0          | R                          | Superior                                                                                                | Muscle                                                    | 0   | DV, IM                                                                                                  | N/A                                         | FNAB                                                        | N/A                    | 0         | 1, 36 Gy         | Hormonal         | 1         | PR                                         | 0         | 1.0          | 1.0          | 1         |
| <b>Dunaway et al. 1985</b> <sup>26</sup>     | Case Report – V  | 1 / 0         | 60           | Lung               | 7.0           | L                          | Superolateral                                                                                           | Bone                                                      | 0   | D, DV, Pt                                                                                               | Osteolytic                                  | Biopsy                                                      | N/A                    | 1         | 1                | 0                | 0         | PD                                         | 0         | 12.0         | 12.0         | 1         |
| <b>Bond et al. 1986</b> <sup>27</sup>        | Case Series – IV | 2 / 1 (50%)   | 42 (33-51)   | 2 Melanoma (100%)  | 96.0 (84-108) | 1 L (50%)<br>1 R (50%)     | 1 Inferolateral (50%)<br>1 Medial (50%)                                                                 | 2 Bone (100%)<br>1 Muscle (50%)                           | 0   | 2 S (100%)<br>1 Mass, Pro (50%)<br>1 D, OP (50%)                                                        | N/A                                         | 2 Partial (100%)                                            | 2Decompression (100%)  | 2 (100%)  | 2 (100%)         | 0                | N/A       | 1 CR (50%)<br>1 PD (50%)                   | 0         | 23.0 (10-36) | 23.0 (10-36) | 0         |
| <b>Denby et al. 1986</b> <sup>28</sup>       | Case Report – V  | 1 / 0         | 65           | Kidney             | 0             | T                          | Lateral                                                                                                 | Bone                                                      | 0   | D, S                                                                                                    | Osteolytic                                  | Partial                                                     | N/A                    | 0         | 0                | 0                | 1         | CR                                         | 0         | 12.0         | 12.0         | 1         |
| <b>Schlaen et al. 1986</b> <sup>29</sup>     | Case Report – V  | 1 / 0         | 58           | Breast             | 120.0         | L                          | Diffuse                                                                                                 | Soft Tissue                                               | 0   | D, Mass, Pro, RAPD                                                                                      | N/A                                         | Partial                                                     | N/A                    | 1         | 0                | 0                | 0         | PD                                         | 0         | 1.0          | 1.0          | 0         |
| <b>Hornblass et al. 1987</b> <sup>30</sup>   | Case Report – V  | 1 / 1         | 35           | Thyroid            | 0             | R                          | Superolateral                                                                                           | Bone                                                      | 0   | Mass, S                                                                                                 | Osteolytic                                  | Partial                                                     | N/A                    | 1         | 1                | 0                | N/A       | N/A                                        | 0         | 1.0          | 1.0          | 1         |
| <b>Kaltreider et al. 1987</b> <sup>31</sup>  | Case Report – V  | 1 / 1         | 43           | Soft Tissue        | 83.0          | R                          | Medial                                                                                                  | Bone                                                      | 0   | DV, IM, Pro                                                                                             | Osteolytic                                  | Complete                                                    | N/A                    | 1         | 0                | 0                | 1         | CR                                         | 0         | 7.0          | 7.0          | 1         |
| <b>Noci et al. 1987</b> <sup>32</sup>        | Case Report – V  | 1 / 1         | 54           | Breast             | 108.0         | L                          | Superolateral                                                                                           | Soft Tissue                                               | 0   | Pro                                                                                                     | N/A                                         | Biopsy                                                      | N/A                    | 0         | 0                | 0                | 0         | N/A                                        | 0         | 12.0         | 12.0         | 0         |
| <b>Oosterhuis et al. 1987</b> <sup>33</sup>  | Case Report – V  | 1 / 0         | 35           | Melanoma           | 12.0          | R                          | Lateral                                                                                                 | Muscle                                                    | 0   | D, DV, Pro                                                                                              | N/A                                         | Partial                                                     | N/A                    | 0         | 0                | 0                | 1         | PR                                         | 1         | 9.0          | 9.0          | 0         |
| <b>Otto et al. 1987</b> <sup>34</sup>        | Case Report – V  | 1 / 0         | 41           | Skin               | 108.0         | L                          | Posterior                                                                                               | Soft Tissue                                               | 0   | Mass, OP                                                                                                | N/A                                         | Complete                                                    | Exenteration           | 1         | 1, 50 Gy         | 0                | 0         | PR                                         | 0         | 48.0         | 48.0         | 0         |
| <b>Shields et al. 1987</b> <sup>35</sup>     | Case Report – V  | 1 / 1         | 63           | Carcinoid          | 84.0          | R                          | Superior                                                                                                | Muscle                                                    | 0   | D, OP, Pro                                                                                              | N/A                                         | Complete                                                    | N/A                    | 0         | 0                | 0                | 0         | N/A                                        | 0         | 1.0          | 1.0          | 1         |
| <b>Stefanyszyn et al. 1987</b> <sup>36</sup> | Case Series – IV | 4 / 4 (100%)  | 50 (47-70)   | 4 Breast (100%)    | 48 (0-60)     | 2 L (50%)<br>2 R (50%)     | 2 Superior (50%)<br>1 Inferior (25%)<br>1 Superolateral (25%)                                           | 2 Soft Tissue (50%)<br>1 Bone (25%)<br>1 Muscle (25%)     | 0   | 3 En (75%)<br>3 Pro (75%)<br>1 IM (25%)                                                                 | N/A                                         | 4 Biopsy (100%)                                             | N/A                    | 1 (25%)   | 4 (100%)         | 1 Hormonal (25%) | 4 (100%)  | 4 PR (100%)                                | 0         | 30.0 (3-36)  | 30.0 (3-36)  | 4 (100%)  |
| <b>Boldt et al. 1988</b> <sup>37</sup>       | Case Series – IV | 8 / 0         | 71.5 (58-84) | 8 Prostate (100%)  | N/A           | 7 R (87.5%)<br>1 L (12.5%) | 5 Superior (62.5%)<br>2 Superolateral (25%)<br>1 Posterior (12.5%)                                      | 6 Bone (75%)<br>2 Soft Tissue (25%)                       | 0   | 6 D (85%), 6 Pro (75%), 4 OP (50%), 3 S (37.5%), 2 DV (25%), 2 Pt (25%), 1 Mass (12.5%)<br>1 RE (12.5%) | 4Osteoblastic (50%)<br>1 Osteolytic (12.5%) | 7 Biopsy (87.5%), 1 Complete (12.5%)                        | N/A                    | 1 (12.5%) | 5 (62.5%), 30 Gy | 0                | 7 (87.5%) | 2 CR (25%)<br>5 PR (62.5%)<br>1 PD (12.5%) | 1 (12.5%) | 6.5 (3-60)   | 6.5 (3-60)   | 2 (25%)   |
| <b>Orcutt et al. 1988</b> <sup>38</sup>      | Case Series – IV | 6 / 2 (33.3%) | 55 (49-87)   | 6 Melanoma (100%)  | 36.0 (12-60)  | 4 L (66.7%)<br>2 R (33.3%) | 2 Medial (33.3%)<br>1 Diffuse (16.7%)<br>1 Lateral (16.7%)<br>1 Posterior (16.7%)<br>1 Superior (16.7%) | 3 Muscle (50%)<br>2 Soft Tissue (33.3%)<br>1 Bone (16.7%) | 0   | 5 Pro (83.3%), 3 D (50%), 1 IM (16.7%), 1 OP (16.7%), 1 RE (16.7%),                                     | N/A                                         | 3 Complete (50%)<br>1 Biopsy (33.3%)<br>1 FNAB              | N/A                    | 1 (16.7%) | 4 (66.7%), 36 Gy | 0                | N/A       | N/A                                        | 0         | 3.0 (2-6)    | 3.0 (2-6)    | 0         |

|                                              |                     |                    |                 |                                                                                                                                                                                                                                                     |                 |                                            |                                                                                                      |                                                                        |   |                                                                                                                                                                    |            |                                      |                   |          |                   |                      |          |                          |     |                 |                 |           |
|----------------------------------------------|---------------------|--------------------|-----------------|-----------------------------------------------------------------------------------------------------------------------------------------------------------------------------------------------------------------------------------------------------|-----------------|--------------------------------------------|------------------------------------------------------------------------------------------------------|------------------------------------------------------------------------|---|--------------------------------------------------------------------------------------------------------------------------------------------------------------------|------------|--------------------------------------|-------------------|----------|-------------------|----------------------|----------|--------------------------|-----|-----------------|-----------------|-----------|
|                                              |                     |                    |                 |                                                                                                                                                                                                                                                     |                 |                                            |                                                                                                      |                                                                        |   | 1 S (16.7%),<br>1 VL (16.7%)                                                                                                                                       |            | (16.7%)                              |                   |          |                   |                      |          |                          |     |                 |                 |           |
| Jacobs et al.<br>1989 <sup>39</sup>          | Case Series –<br>IV | 2 /<br>0           | 58.5<br>(56-61) | 2 Breast (100%)                                                                                                                                                                                                                                     | 84.0<br>(72-96) | 2 R (100%)                                 | 2 Superolateral<br>(100%)                                                                            | 2 Soft Tissue<br>(100%)                                                | 0 | 2 Pro (100%)                                                                                                                                                       | N/A        | 2 Biopsy<br>(100%)                   | N/A               | 1 (50%)  | 1 (50%)           | 2 Hormonal<br>(100%) | 2 (100%) | 1 PR (50%)<br>1 SD (50%) | 0   | 14.0<br>(12-16) | 14.0<br>(12-16) | 2 (100%)  |
| Shields et al.<br>1988 <sup>40</sup>         | Case Series –<br>IV | 35 /<br>21 (60%)   | 70              | 18 Breast (51.4%)<br>6 Prostate (17.1%)<br>2 CUP (5.7%)<br>2 Lung (5.7%)<br>2 Melanoma (5.7%)<br>1 Carcinoid (2.9%)<br>1 Kidney (2.9%)                                                                                                              | N/A             | 21 R (60%)<br>12 L (34.3%)<br>2 B (5.7%)   | N/A                                                                                                  | N/A                                                                    | 0 | 18 D (51.4%)<br>17 Pro (48.6%)<br>7 Mass (20%)<br>7 OP (20%)<br>6 RE (17.1%)<br>6 VL (17.1%)<br>5 RAPD (14.3%)<br>2 S (5.7%)                                       | N/A        | 35 Biopsy<br>(100%)                  | N/A               | N/A      | N/A               | N/A                  | N/A      | N/A                      | 0   | 13.0            | 13.0            | N/A       |
| Malviya et al.<br>1989 <sup>41</sup>         | Case Report –<br>V  | 1 /<br>1           | 66              | Ovary                                                                                                                                                                                                                                               | 0               | L                                          | Posterior                                                                                            | Fat                                                                    | 0 | VL                                                                                                                                                                 | 0          | Complete                             | N/A               | 1        | 0                 | 0                    | 0        | PR                       | 0   | 3.0             | 3.0             | 1         |
| Ruusuvaara et al.<br>1989 <sup>42</sup>      | Case Report –<br>V  | 1 /<br>0           | 63              | Melanoma                                                                                                                                                                                                                                            | 53.0            | R                                          | Posterior                                                                                            | Soft Tissue                                                            | 0 | IM, Pro                                                                                                                                                            | N/A        | FNAB                                 | N/A               | 1        | 0                 | 0                    | 0        | PD                       | 0   | 1.0             | 1.0             | 0         |
| Spaide et al.<br>1989 <sup>43</sup>          | Case Report –<br>V  | 1 /<br>0           | 61              | Lung                                                                                                                                                                                                                                                | 0               | R                                          | Superolateral                                                                                        | Soft Tissue                                                            | 0 | Mass, Pro, RAPD,<br>S                                                                                                                                              | N/A        | Biopsy                               | N/A               | 1        | 0                 | 0                    | 1        | CR                       | 0   | 3.0             | 3.0             | 1         |
| Capone et al.<br>1990 <sup>44</sup>          | Case Series –<br>IV | 5 /<br>2 (40%)     | 63<br>(37-71)   | 1 Breast, Gastric,<br>Kidney, Melanoma,<br>Skin (20%)                                                                                                                                                                                               | 24<br>(6-48)    | 2 B (40%)<br>2 R (40%)<br>1 L (20%)        | 3 Diffuse (60%)<br>2 Lateral (40%)                                                                   | 5 Muscles<br>(100%)                                                    | 0 | 4 DI (80%),<br>3 IM (60%),<br>3 Pro (60%),<br>2 OP (40%),<br>2 RE (40%),<br>1 DV (20%)                                                                             | N/A        | 4 FNAB<br>(80%)<br>1 Biopsy<br>(20%) | N/A               | 5 (100%) | 4 (80%),<br>30 Gy | 0                    | 1 (20%)  | 1 PR (20%)               | 0   | 4.0<br>(3-23)   | 4.0<br>(3-23)   | 1 (20%)   |
| Friedman et al.<br>1990 <sup>45</sup>        | Case Report –<br>V  | 1 /<br>0           | 72              | Thyroid                                                                                                                                                                                                                                             | 6.0             | R                                          | Medial                                                                                               | Muscle                                                                 | 0 | OP, RE, RAPD                                                                                                                                                       | N/A        | Partial                              | N/A               | 0        | 0                 | 0                    | 1        | N/A                      | 0   | 12.0            | 12.0            | 0         |
| Goldberg et al.<br>1990 <sup>46</sup>        | Case Series –<br>IV | 36 /<br>24 (66.7%) | 64<br>(35-86)   | 13 Breast (36.1%),<br>5Melanoma (13.9%)<br>4 Prostate (11.1%),<br>3 CUP (8.3%),<br>3Smallbowel (8.3%)<br>2 Lung (5.6%)<br>1 Carcinoid (2.8%),<br>1 Ovary (2.8%),<br>1 Pancreas (2.8%),<br>1 Skin (2.8%),<br>1 Soft Tissue (2.8%)<br>1 Uterus (2.8%) | 29.5<br>(0-240) | 17 L (47.2%)<br>16 R (44.4%)<br>3 B (8.3%) | 6 Medial (16.7%)<br>4 Lateral (11.1%)<br>4 Superior (11.1%)<br>3 Diffuse (8.3%)<br>3 Inferior (8.3%) | 11 Soft Tissue<br>(30.6%)<br>10 Bone<br>(27.8%)<br>4 Muscle<br>(11.1%) | 0 | 21 IM (58.3%)<br>17 D (47.2%)<br>13 Pro (36.1%)<br>13 Pt (36.1%)<br>12 Mass (33.3%)<br>10 OP (27.8%)<br>9 En (25%)<br>8 DV (22.2%)<br>8 S (22.2%)<br>1 RAPD (2.8%) | N/A        | N/A                                  | N/A               | N/A      | N/A               | N/A                  | N/A      | N/A                      | N/A | 4.0<br>(1-76)   | 40.<br>(1-76)   | 0         |
| Shetlar et al.<br>1990 <sup>47</sup>         | Case Series –<br>IV | 3 /<br>2 (66.7%)   | 51<br>(38-71)   | 3 Carcinoid (100%)                                                                                                                                                                                                                                  | 46.0<br>(9-69)  | 2 L (66.7%)<br>1 R (33.3%)                 | 2 Posterior (66.7%)<br>1 Medial (33.3%)                                                              | 2 Soft Tissue<br>(66.7%)<br>1 Muscle<br>(33.3%)                        | 0 | 3 Pro (100%)<br>1 RAPD (33.3%)                                                                                                                                     | N/A        | N/A                                  | N/A               | 0        | 0                 | 0                    | 0        | N/A                      | 0   | 12.0<br>(5-24)  | 12.0<br>(5-24)  | 2 (66.7%) |
| Wakisaka et al.<br>1990 <sup>48</sup>        | Case Report –<br>V  | 1 /<br>0           | 58              | Liver                                                                                                                                                                                                                                               | 0               | L                                          | Superolateral                                                                                        | Soft Tissue                                                            | 1 | D, Pro, Pt                                                                                                                                                         | Osteolytic | Complete                             | N/A               | 0        | 0                 | 0                    | 1        | N/A                      | 0   | 10.0            | 10.0            | 0         |
| Felip et al.<br>1991 <sup>49</sup>           | Case Report –<br>V  | 1 /<br>1           | 64              | Breast                                                                                                                                                                                                                                              | 0               | R                                          | Medial                                                                                               | Muscle                                                                 | 0 | D, Pro, VL                                                                                                                                                         | N/A        | Biopsy                               | N/A               | 0        | 0                 | 0                    | 0        | N/A                      | 0   | 3.0             | 3.0             | 1         |
| Glazer et al.<br>1991 <sup>50</sup>          | Case Report –<br>V  | 1 /<br>1           | 64              | Breast                                                                                                                                                                                                                                              | 0               | R                                          | Medial                                                                                               | Muscle                                                                 | 0 | RE, S                                                                                                                                                              | N/A        | Biopsy                               | N/A               | 1        | 1, 35 Gy          | 0                    | 1        | N/A                      | 0   | 12.0            | 12.0            | 1         |
| Van der Heijden et al.<br>1991 <sup>51</sup> | Case Report –<br>V  | 1 /<br>1           | 47              | Breast                                                                                                                                                                                                                                              | 60.0            | R                                          | Inferior                                                                                             | Muscle                                                                 | 0 | D, IM, Mass                                                                                                                                                        | N/A        | Biopsy                               | N/A               | 0        | 1                 | 0                    | 1        | PR                       | 0   | 12.0            | 12.0            | 1         |
| Zucker et al.<br>1991 <sup>52</sup>          | Case Report –<br>V  | 1 /<br>1           | 83              | Skin                                                                                                                                                                                                                                                | 60.0            | R                                          | Inferior                                                                                             | Soft Tissue                                                            | 0 | D, IM, Pro                                                                                                                                                         | N/A        | Biopsy                               | N/A               | 0        | 1                 | 0                    | 1        | PR                       | 0   | 3.0             | 3.0             | 1         |
| Brackup et al.<br>1992 <sup>53</sup>         | Case Report –<br>V  | 1 /<br>0           | 54              | Melanoma                                                                                                                                                                                                                                            | 48.0            | R                                          | Lateral                                                                                              | Muscle                                                                 | 0 | IM, OP, Pro                                                                                                                                                        | N/A        | Partial                              | Decompressi<br>on | 0        | 1, 50 Gy          | 0                    | 0        | PR                       | 0   | 9.0             | 9.0             | 0         |
| Di Leo et al.<br>1992 <sup>54</sup>          | Case Report –<br>V  | 1 /<br>1           | 77              | Prostate                                                                                                                                                                                                                                            | 0               | L                                          | Medial                                                                                               | Muscle                                                                 | 0 | D, OP, Pro                                                                                                                                                         | N/A        | Biopsy                               | N/A               | 0        | 0                 | Hormonal             | 1        | PR                       | 0   | 14.0            | 14.0            | 1         |

|                                               |                  |                 |            |                                                                                                                                               |              |                                             |               |             |     |                                                                                                                                |            |                                        |                |           |            |                     |           |                               |   |               |               |          |
|-----------------------------------------------|------------------|-----------------|------------|-----------------------------------------------------------------------------------------------------------------------------------------------|--------------|---------------------------------------------|---------------|-------------|-----|--------------------------------------------------------------------------------------------------------------------------------|------------|----------------------------------------|----------------|-----------|------------|---------------------|-----------|-------------------------------|---|---------------|---------------|----------|
| <b>Shetty et al. 1992</b> <sup>55</sup>       | Case Report – V  | 1 / 1           | 74         | Colorectal                                                                                                                                    | 24.0         | L                                           | Superior      | Bone        | 0   | Mass, Pro                                                                                                                      | N/A        | Biopsy                                 | N/A            | 0         | 1          | 0                   | 0         | PD                            | 0 | 2.0           | 2.0           | 0        |
| <b>Tijl et al. 1992</b> <sup>56</sup>         | Case Series – IV | 34 / 27 (79.4%) | 65 (32-88) | 20 Breast (58.8%)<br>5 Prostate (14.7%)<br>3 Melanoma (8.8%)<br>2 Kidney (5.9%)<br>2 Soft Tissue (5.9%)<br>1 Lung (2.9%)<br>1 Thyroid (2.9%)  | 21.0 (0-240) | 18 R (52.9%)<br>12 L (35.3%)<br>4 B (11.8%) | N/A           | N/A         | N/A | 15 Pro (44.1%)<br>13 D (38.2%)<br>7 Pt (20.6%)<br>6 En (17.6%)<br>5 IM (14.7%)<br>5 Mass (14.7%)<br>3 DV (8.8%)<br>2 OP (5.9%) | N/A        | 34 Surgery (100%)<br>7 Partial (20.6%) | N/A            | 7 (20.6%) | 20 (58.8%) | 13 Hormonal (38.2%) | N/A       | 24 PR (70.6%)<br>4 PD (11.8%) | 0 | 26.0 (4-75)   | 26.0 (4-75)   | 16 (47%) |
| <b>Vanderpum et al. 1992</b> <sup>57</sup>    | Case Report – V  | 1 / 0           | 61         | Thyroid                                                                                                                                       | 0            | R                                           | Medial        | Muscle      | 0   | D, DV, OP, Pro                                                                                                                 | N/A        | Partial                                | N/A            | 0         | 0          | 0                   | 1         | PR                            | 0 | 12.0          | 12.0          | 0        |
| <b>Bersani et al. 1994</b> <sup>58</sup>      | Case Report – V  | 1 / 0           | 50         | Kidney                                                                                                                                        | 180.0        | L                                           | Superolateral | Soft Tissue | 0   | DV, OP, Pro, RAPD                                                                                                              | N/A        | Complete                               | N/A            | 0         | 1          | 0                   | 1         | PR                            | 0 | 12.0          | 12.0          | 1        |
| <b>Ellis et al. 1994</b> <sup>59</sup>        | Case Report – V  | 1 / 0           | 86         | Melanoma                                                                                                                                      | 0            | L                                           | Superior      | Soft Tissue | 0   | IM, Mass, Pro, Pt                                                                                                              | N/A        | Biopsy                                 | N/A            | 0         | 1, 31 Gy   | 0                   | 0         | SD                            | 0 | 18.0          | 18.0          | 0        |
| <b>Hugkultstone et al. 1994</b> <sup>60</sup> | Case Report – V  | 1 / 0           | 45         | Bladder                                                                                                                                       | 0            | B                                           | Medial        | Soft Tissue | 0   | D, IM, Mass                                                                                                                    | N/A        | Biopsy                                 | N/A            | 1         | 1          | 0                   | 0         | PD                            | 0 | 5.0           | 5.0           | 0        |
| <b>Loo et al. 1994</b> <sup>61</sup>          | Case Report – V  | 1 / 1           | 71         | Liver                                                                                                                                         | 0            | R                                           | Superior      | Muscle      | 1   | DV, IM                                                                                                                         | Osteolytic | Complete                               | N/A            | 0         | 0          | 0                   | 0         | PD                            | 0 | 3.0           | 3.0           | 0        |
| <b>Tranfa et al. 1994</b> <sup>62</sup>       | Case Report – V  | 1 / 0           | 85         | Liver                                                                                                                                         | 0            | R                                           | Superolateral | Soft Tissue | 0   | DV, OP, Pro                                                                                                                    | Osteolytic | Partial                                | N/A            | 0         | 0          | 0                   | 1         | N/A                           | 0 | 3.0           | 3.0           | 1        |
| <b>Aburn et al. 1995</b> <sup>63</sup>        | Case Report – V  | 1 / 0           | 64         | Carcinoid                                                                                                                                     | 11.0         | L                                           | Superior      | Bone        | 0   | D, DV, Pro                                                                                                                     | N/A        | Partial                                | N/A            | 0         | 1, 30 Gy   | 0                   | 1         | PR                            | 0 | 12.0          | 12.0          | 0        |
| <b>Airolidi et al. 1995</b> <sup>64</sup>     | Case Report – V  | 1 / 0           | 77         | Kidney                                                                                                                                        | 77.0         | R                                           | Medial        | Bone        | 0   | Pro                                                                                                                            | Osteolytic | Complete                               | Exenteration   | 0         | 1          | 0                   | 1         | N/A                           | 0 | 14.0          | 14.0          | 0        |
| <b>Day et al. 1995</b> <sup>65</sup>          | Case Report – V  | 1 / 0           | 55         | Salivary Gland                                                                                                                                | 0            | L                                           | Posterior     | Soft Tissue | 0   | D, S                                                                                                                           | N/A        | Complete                               | Exenteration   | 0         | 1, 60 Gy   | 0                   | 1         | CR                            | 0 | 72.0          | 72.0          | 1        |
| <b>Fan et al. 1995</b> <sup>66</sup>          | Case Series – IV | 3 / 2 (66.7%)   | 58 (51-85) | 3 Carcinoid (100%)                                                                                                                            | 0            | 2 L (66.7%)<br>1 R (33.3%)                  | N/A           | N/A         | N/A | 2 IM (66.7%)<br>2 Pro (66.7%)<br>1 D (33.3%)<br>1 DV (33.3%)                                                                   | N/A        | 3 Biopsy (100%)                        | N/A            | 2 (66.7%) | 2 (66.7%)  | 0                   | 1 (33.3%) | 2 PR (66.7%)                  | 0 | 12.0 (0.5-24) | 12.0 (0.5-24) | 0        |
| <b>Rhatigan et al. 1995</b> <sup>67</sup>     | Case Report – V  | 1 / 1           | 64         | Breast                                                                                                                                        | 60.0         | B                                           | Superolateral | Soft Tissue | 0   | IM, OP, Pro                                                                                                                    | N/A        | Biopsy                                 | N/A            | 0         | 1          | 0                   | 0         | PD                            | 0 | 0.5           | 0.5           | 0        |
| <b>Thomas et al. 1995</b> <sup>68</sup>       | Case Report – V  | 1 / 1           | 58         | Salivary Gland                                                                                                                                | 192.0        | R                                           | Lateral       | Muscle      | 0   | Pro, S                                                                                                                         | N/A        | Partial                                | Decompressi on | 1         | 0          | 0                   | 1         | CR                            | 0 | 12.0          | 12.0          | 1        |
| <b>Burnstine et al. 1996</b> <sup>69</sup>    | Case Report – V  | 1 / 1           | 46         | Breast                                                                                                                                        | 24.0         | R                                           | Inferior      | Muscle      | 0   | D, OP, Pro                                                                                                                     | N/A        | Partial                                | N/A            | 0         | 1, 60 Gy   | 0                   | 0         | N/A                           | 1 | 4.0           | 11.0          | 0        |
| <b>El-Toukhy et al. 1996</b> <sup>70</sup>    | Case Report – V  | 1 / 0           | 45         | Carcinoid                                                                                                                                     | 0            | R                                           | Superior      | Soft Tissue | 1   | Pro, Pt, RAPD                                                                                                                  | N/A        | Partial                                | Decompressi on | 0         | 0          | 0                   | 1         | N/A                           | 1 | 36.0          | 144.0         | 1        |
| <b>Char et al. 1997</b> <sup>71</sup>         | Case Series – IV | 31 / 16 (51.6%) | 57 (37-77) | 9 Breast (29%)<br>8 Melanoma (25.8%)<br>6 CUP (19.3%)<br>2 Prostate (6.4%)<br>1 Carcinoid, Lung, Kidney, Salivary, SoftTissue, Stomach (3.2%) | N/A          | N/A                                         | N/A           | N/A         | N/A | 15 D (48.4%)<br>8 Pro (25.8%)<br>5 DV (16.1%)<br>1 RE (3.2%)                                                                   | N/A        | 16 Partial (51.6%)<br>15 FNAB (43.4%)  | N/A            | N/A       | N/A        | N/A                 | N/A       | N/A                           | 0 | 15.0          | 15.0          | N/A      |
| <b>Fezza et al. 1997</b> <sup>72</sup>        | Case Report – V  | 1 / 1           | 75         | Soft Tissue                                                                                                                                   | 180.0        | L                                           | Medial        | Muscle      | 0   | DV, IM, Pro                                                                                                                    | N/A        | Biopsy                                 | N/A            | 0         | 1, 46 Gy   | 0                   | 1         | N/A                           | 0 | 2.0           | 2.0           | 1        |
| <b>Hayashi et al. 1997</b> <sup>73</sup>      | Case Report – V  | 1 / 1           | 63         | Bone                                                                                                                                          | 324.0        | R                                           | Posterior     | Bone        | 1   | DV                                                                                                                             | Osteolytic | Complete                               | N/A            | 0         | 1, 50 Gy   | 0                   | 0         | N/A                           | 0 | 6.0           | 6.0           | 1        |
| <b>Logrono et al. 1997</b> <sup>74</sup>      | Case Report – V  | 1 / 0           | 45         | Soft Tissue                                                                                                                                   | 21.0         | L                                           | Superior      | Fat         | 0   | Pro, S                                                                                                                         | 0          | FNAB                                   | N/A            | 0         | 1, 50 Gy   | 0                   | 1         | N/A                           | 0 | 8.0           | 8.0           | 0        |
| <b>Mezer et al. 1997</b> <sup>75</sup>        | Case Report – V  | 1 / 1           | 70         | Kidney                                                                                                                                        | 84.0         | R                                           | Inferolateral | Soft Tissue | 0   | D, DV, Mass                                                                                                                    | N/A        | Partial                                | N/A            | 0         | 1, 50 Gy   | 0                   | 1         | N/A                           | 1 | 2.0           | 4.0           | 1        |

|                                                      |                  |                 |            |                                                                                                                                              |             |                                            |                                           |                                                       |     |                                                                                                                  |                       |                                          |                      |            |                      |                       |     |     |   |                |                |         |
|------------------------------------------------------|------------------|-----------------|------------|----------------------------------------------------------------------------------------------------------------------------------------------|-------------|--------------------------------------------|-------------------------------------------|-------------------------------------------------------|-----|------------------------------------------------------------------------------------------------------------------|-----------------------|------------------------------------------|----------------------|------------|----------------------|-----------------------|-----|-----|---|----------------|----------------|---------|
| <b>Sekundo et al. 1997</b> <sup>76</sup>             | Case Report – V  | 1 / 1           | 54         | Breast                                                                                                                                       | 0           | L                                          | Superomedial                              | Fat                                                   | 0   | IM, Mass, Pro                                                                                                    | N/A                   | Biopsy                                   | N/A                  | 1          | 0                    | 0                     | 1   | N/A | 0 | 24.0           | 24.0           | 1       |
| <b>Zambarakji et al. 1997</b> <sup>77</sup>          | Case Report – V  | 1 / 1           | 49         | Breast                                                                                                                                       | 6.0         | R                                          | Diffuse                                   | Muscle                                                | 0   | D, IM                                                                                                            | N/A                   | Biopsy                                   | N/A                  | 0          | 1                    | 0                     | 1   | N/A | 0 | 3.0            | 3.0            | 1       |
| <b>Font et al. 1998</b> <sup>78</sup>                | Case Report – V  | 1 / 1           | 79         | Liver                                                                                                                                        | 0           | R                                          | Lateral                                   | Bone                                                  | 0   | IM, OP, Pro, RAPD, S                                                                                             | Osteolytic            | Biopsy                                   | N/A                  | 0          | 1                    | 0                     | 1   | PR  | 0 | 36.0           | 36.0           | 1       |
| <b>Garcia et al. 1998</b> <sup>79</sup>              | Case Report – V  | 1 / 0           | 43         | Breast                                                                                                                                       | 0           | B                                          | Diffuse                                   | Soft Tissue                                           | 0   | IM, Pro                                                                                                          | N/A                   | Biopsy                                   | N/A                  | 0          | 1, 45 Gy             | 0                     | 1   | PR  | 0 | 3.0            | 3.0            | 1       |
| <b>Schaefer-Hirschkind et al. 1998</b> <sup>80</sup> | Case Report – V  | 1 / 0           | 81         | Kidney                                                                                                                                       | 36.0        | L                                          | Posterior                                 | Soft Tissue                                           | 0   | OP, Pro                                                                                                          | N/A                   | Biopsy                                   | N/A                  | 1          | 1                    | 0                     | 0   | PD  | 0 | 3.0            | 3.0            | 1       |
| <b>Toller et al. 1998</b> <sup>81</sup>              | Case Report – V  | 1 / 1           | 47         | Breast                                                                                                                                       | 96.0        | B                                          | Diffuse                                   | Soft Tissue                                           | 0   | D, DV, OP, RAPD                                                                                                  | N/A                   | Biopsy                                   | N/A                  | 0          | 0                    | 0                     | 0   | PD  | 0 | 9.0            | 9.0            | 0       |
| <b>Collins et al. 1999</b> <sup>82</sup>             | Case Report – V  | 1 / 0           | 47         | Esophagus                                                                                                                                    | 12.0        | L                                          | Superomedial                              | Soft Tissue                                           | 0   | Mass                                                                                                             | N/A                   | Biopsy                                   | N/A                  | N/A        | N/A                  | N/A                   | N/A | N/A | 0 | 3.0            | 3.0            | 1       |
| <b>Scolyer et al. 1999</b> <sup>83</sup>             | Case Report – V  | 1 / 0           | 77         | Liver                                                                                                                                        | 2.0         | R                                          | Superolateral                             | Bone                                                  | 0   | S                                                                                                                | N/A                   | Complete                                 | N/A                  | N/A        | N/A                  | N/A                   | N/A | N/A | 0 | 3.0            | 3.0            | 1       |
| <b>Wein et al. 1999</b> <sup>84</sup>                | Case Report – V  | 1 / 1           | 62         | Carcinoid                                                                                                                                    | 0           | L                                          | Posterior                                 | Soft Tissue                                           | 0   | DV, RAPD                                                                                                         | N/A                   | Biopsy                                   | N/A                  | 1          | 1                    | 0                     | 0   | PD  | 0 | 3.0            | 3.0            | 1       |
| <b>Wolstencroft et al. 1999</b> <sup>85</sup>        | Case Report – V  | 1 / 1           | 53         | Breast                                                                                                                                       | 0           | L                                          | Diffuse                                   | Soft Tissue                                           | 0   | DV, En                                                                                                           | N/A                   | Biopsy                                   | N/A                  | 1          | 1                    | Hormonal              | N/A | SD  | 0 | 4.0            | 4.0            | 1       |
| <b>Callejo et al. 2000</b> <sup>86</sup>             | Case Report – V  | 1 / 0           | 72         | Soft Tissue                                                                                                                                  | 0           | L                                          | Lateral                                   | Fat                                                   | 0   | D, IM, Mass, Pro, RAPD                                                                                           | N/A                   | Partial                                  | N/A                  | 0          | 1, 30 Gy             | 0                     | 1   | PR  | 0 | 9.0            | 9.0            | 0       |
| <b>Daumerie et al. 2000</b> <sup>87</sup>            | Case Report – V  | 1 / 1           | 59         | Thyroid                                                                                                                                      | 0           | L                                          | Superolateral                             | Bone                                                  | 1   | DV, Pro, S                                                                                                       | Osteolytic            | Biopsy                                   | N/A                  | 0          | 0                    | Radioiodine           | 1   | PR  | 0 | 36.0           | 36.0           | 0       |
| <b>Friedrich et al. 2000</b> <sup>88</sup>           | Case Report – V  | 1 / 1           | 61         | Salivary Gland                                                                                                                               | 180.0       | R                                          | Lateral                                   | Bone                                                  | 0   | IM, Pro                                                                                                          | Osteolytic            | Partial                                  | N/A                  | 0          | 1                    | 0                     | 1   | PR  | 0 | 36.0           | 36.0           | 0       |
| <b>Stuntz et al. 2000</b> <sup>89</sup>              | Case Report – V  | 1 / 0           | 40         | Breast                                                                                                                                       | 0           | B                                          | Diffuse                                   | Soft Tissue                                           | 0   | DV, Mass, OP                                                                                                     | N/A                   | Biopsy                                   | N/A                  | 1          | 1                    | 0                     | 0   | PD  | 0 | 34.0           | 34.0           | 0       |
| <b>Bartley et al. 2001</b> <sup>90</sup>             | Case Report – V  | 1 / 0           | 24         | Adrenal Gland                                                                                                                                | 24.0        | R                                          | Superolateral                             | Bone                                                  | 1   | D, OP, Pt                                                                                                        | Osteolytic            | Partial                                  | Decompression        | 0          | 1, 37.5 Gy           | 0                     | N/A | N/A | 1 | 8.0            | 15.0           | 0       |
| <b>Shields et al. 2001</b> <sup>91</sup>             | Case Series – IV | 70 / 45 (64.3%) | N/A        | 40 Breast (57.1%)<br>10 Prostate (14.3%)<br>7 Lung (10%)<br>4 Kidney (5.7%)<br>4 Melanoma (5.7%)<br>3 Carcinoid (4.3%)<br>2Smallbowel (2.8%) | 55.0 (6-90) | 34 R (48.6%)<br>33 L (47.1%)<br>3 B (4.3%) | 41 Diffuse (58.6%)                        | 41 Soft Tissue (58.6%),<br>23 Bone (32.9%)            | N/A | 38 IM (54.3%)<br>35 Pro (50%)<br>31 Mass (44.3%)<br>16 DV (22.9%)<br>12 OP (17.1%)<br>8 En (11.4%)<br>6 D (8.6%) | 23 Osteolytic (32.9%) | 52 Biopsy (74.3%)<br>18 Complete (25.7%) | N/A                  | 50 (71.4%) | 39 (55.7%),<br>35 Gy | 0                     | N/A | N/A | 0 | 20.0           | 20.0           | N/A     |
| <b>Maheshwari et al. 2002</b> <sup>92</sup>          | Case Report – V  | 1 / 0           | 56         | Tongue                                                                                                                                       | 0           | L                                          | Diffuse                                   | Fat                                                   | 0   | DV, OP, IM, Pro, S                                                                                               | N/A                   | Biopsy                                   | N/A                  | 1          | 1, 45 Gy             | 0                     | 1   | CR  | 0 | 13.0           | 13.0           | 1       |
| <b>McCulley et al. 2002</b> <sup>93</sup>            | Case Report – V  | 1 / 1           | 29         | Cervix                                                                                                                                       | 1.0         | R                                          | Inferior                                  | Soft Tissue                                           | 0   | IM, Pro                                                                                                          | N/A                   | Biopsy                                   | N/A                  | 1          | 1                    | 0                     | 0   | PD  | 0 | 8.0            | 8.0            | 0       |
| <b>Misra et al. 2002</b> <sup>94</sup>               | Case Report – V  | 1 / 1           | 40         | Gallbladder                                                                                                                                  | 2.0         | L                                          | Superomedial                              | Muscle                                                | 0   | D, IM                                                                                                            | N/A                   | FNAB                                     | N/A                  | 0          | 0                    | 0                     | 0   | PD  | 0 | 2.0            | 2.0            | 1       |
| <b>Baltogiannis et al. 2003</b> <sup>95</sup>        | Case Report – V  | 1 / 0           | 79         | Prostate                                                                                                                                     | 1.0         | L                                          | Medial                                    | Bone                                                  | 0   | DV, IM, Pro                                                                                                      | N/A                   | Complete                                 | Exenteration         | N/A        | N/A                  | N/A                   | N/A | N/A | 0 | 10.0           | 10.0           | 0       |
| <b>Baroody et al. 2003</b> <sup>96</sup>             | Case Series – IV | 2 / 1           | 37 (37-38) | 2 Melanoma (100%)                                                                                                                            | 19.5 (3-36) | R                                          | 1 Posterior (50%)<br>1 Superomedial (50%) | 2 Soft Tissue (100%)                                  | 0   | IM                                                                                                               | N/A                   | 1 Biopsy (50%)<br>1 Complete (50%)       | 1Exenteration (50%)  | 0          | 0                    | 2Immunotherapy (100%) | 1   | N/A | 0 | 36.0 (26-46)   | 36.0 (26-46)   | 1 (50%) |
| <b>Fynn-Thompson et al. 2003</b> <sup>97</sup>       | Case Report – V  | 1 / 0           | 68         | Bladder                                                                                                                                      | 48.0        | L                                          | Diffuse                                   | Soft Tissue                                           | 0   | D, DV, Pro                                                                                                       | N/A                   | Biopsy                                   | N/A                  | 0          | 0                    | 0                     | 0   | PD  | 0 | 1.0            | 1.0            | 0       |
| <b>Holland et al. 2003</b> <sup>98</sup>             | Case Series – IV | 20 / 11 (55%)   | 67 (29-90) | 8 Breast (40%)<br>3Smallbowel (15%)<br>2 CUP (10%)<br>2 Lung (10%)<br>2 Melanoma (10%)<br>2 Prostate (10%)                                   | N/A         | 10 L (50%)<br>7 R (35%)<br>3 B (15%)       | N/A                                       | 9 Soft Tissue (45%)<br>7 Muscle (35%)<br>4 Bone (20%) | 0   | 11 S (55%)<br>10 D (50%)<br>9 RE (45%)<br>7 Pro (35%)<br>4 OP (20%)<br>3 DV (15%)                                | N/A                   | 11 Partial (55%)<br>9 Biopsy (45%)       | 2Decompression (10%) | 4 (20%)    | 7 (35%)              | 1 Hormonal (5%)       | N/A | N/A | 0 | 14.7 (0.5-107) | 14.7 (0.5-107) | 1 (5%)  |

| 1 Bladder (5%)                              |                  |                |            |                                |              |     |                                      |                                   |     | 1 En (5%)                                                                                                                      |            |                                         |                           |           |                     |                   |     |                                                                 |         |             |             |           |
|---------------------------------------------|------------------|----------------|------------|--------------------------------|--------------|-----|--------------------------------------|-----------------------------------|-----|--------------------------------------------------------------------------------------------------------------------------------|------------|-----------------------------------------|---------------------------|-----------|---------------------|-------------------|-----|-----------------------------------------------------------------|---------|-------------|-------------|-----------|
| Lekse et al. 2003 <sup>99</sup>             | Case Report – V  | 1 / 1          | 78         | Small bowel                    | 4.0          | R   | Inferior                             | Muscle                            | 0   | D                                                                                                                              | N/A        | Biopsy                                  | N/A                       | 0         | 0                   | 0                 | 0   | PD                                                              | 0       | 3.0         | 3.0         | 0         |
| Saleh et al. 2003 <sup>100</sup>            | Case Report – V  | 1 / 1          | 54         | Salivary Gland                 | 5.0          | L   | Medial                               | Fat                               | 0   | D                                                                                                                              | N/A        | Partial                                 | N/A                       | 0         | 1                   | 0                 | 0   | PR                                                              | 0       | 6.0         | 6.0         | 1         |
| Takemoto et al. 2003 <sup>101</sup>         | Case Report – V  | 1 / 0          | 39         | Carcinoid                      | 120.0        | R   | Superior                             | Bone                              | 1   | D                                                                                                                              | N/A        | Biopsy                                  | N/A                       | N/A       | N/A                 | N/A               | N/A | N/A                                                             | 0       | 2.0         | 2.0         | 1         |
| Tehrani et al. 2003 <sup>102</sup>          | Case Report – V  | 1 / 0          | 72         | Soft Tissue                    | 24.0         | L   | Medial                               | Soft Tissue                       | 0   | D, Mass, Pro                                                                                                                   | 0          | Biopsy                                  | N/A                       | 1         | 1, 30 Gy            | 0                 | 0   | PD                                                              | 0       | 7.0         | 7.0         | 0         |
| Zografos et al. 2003 <sup>103</sup>         | Case Series – IV | 7 / 4 (57.1%)  | 54 (34-77) | 7 Melanoma (100%)              | 65.0 (7-106) | N/A | N/A                                  | N/A                               | N/A | 5 IM (71.4%)<br>5 Pro (71.4%)<br>4 Mass (57.1%)<br>4 RE (57.1%)<br>2 DV (28.6%)<br>2 Pt (28.6%)<br>1 OP (14.3%)<br>1 S (14.3%) | N/A        | 3 Partial (42.8%)<br>1 Complete (14.3%) | 1Exenteratio<br>n (14.3%) | 3 (42.8%) | 1 (14.3%),<br>40 Gy | 0                 | N/A | 2 CR (28.6%),<br>2 PR (28.6%),<br>2 PD (28.6%),<br>1 SD (14.3%) | 0       | 5.0 (1-48)  | 5.0 (1-48)  | 2 (28.6%) |
| Chua et al. 2004 <sup>104</sup>             | Case Report – V  | 1 / 1          | 78         | Bladder                        | 48.0         | R   | Superolateral                        | Soft Tissue                       | 1   | IM, Mass, Pro, Pt                                                                                                              | N/A        | Biopsy                                  | N/A                       | 1         | 1                   | 0                 | 0   | PD                                                              | 0       | 1.0         | 1.0         | 0         |
| Glazer-Hockstein et al. 2004 <sup>105</sup> | Case Report – V  | 1 / 0          | 61         | Soft Tissue                    | 48.0         | R   | Lateral                              | Bone                              | 1   | Pro, S                                                                                                                         | N/A        | Complete                                | N/A                       | N/A       | N/A                 | N/A               | N/A | N/A                                                             | 0       | 2.0         | 2.0         | 1         |
| Lell et al. 2004 <sup>106</sup>             | Case Report – V  | 1 / 1          | 63         | Breast                         | 0            | B   | Diffuse                              | Soft Tissue                       | 0   | Pro, S                                                                                                                         | N/A        | Biopsy                                  | N/A                       | N/A       | N/A                 | N/A               | N/A | N/A                                                             | 0       | 3.0         | 3.0         | 1         |
| Van der Zee et al. 2004 <sup>107</sup>      | Case Report – V  | 1 / 1          | 77         | Breast                         | 12.0         | L   | Superomedial                         | Bone                              | 0   | D                                                                                                                              | N/A        | Complete                                | N/A                       | 0         | 1, 30 Gy            | Hormonal,<br>LITT | 1   | PD                                                              | 1       | 10.0        | 35.0        | 1         |
| Zdinak et al. 2004 <sup>108</sup>           | Case Report – V  | 1 / 0          | 39         | Kidney                         | 0            | L   | Medial                               | Muscle                            | 0   | IM, OP, Pro                                                                                                                    | N/A        | Partial                                 | Decompressi<br>on         | 0         | 0                   | Immunothera<br>py | 0   | N/A                                                             | 0       | 3.0         | 3.0         | 0         |
| Borota et al. 2005 <sup>109</sup>           | Case Report – V  | 1 / 0          | 61         | Carcinoid                      | 15.0         | L   | Inferior                             | Muscle                            | 0   | DV, IM, Pro                                                                                                                    | N/A        | Complete                                | N/A                       | 1         | 0                   | Immunothera<br>py | 1   | CR                                                              | 0       | 3.0         | 3.0         | 1         |
| Challagundla et al. 2005 <sup>110</sup>     | Case Report – V  | 1 / 0          | 53         | Prostate                       | N/A          | R   | Diffuse                              | Muscle                            | 1   | D, Pro, RAPD                                                                                                                   | N/A        | Biopsy                                  | N/A                       | 1         | 1, 40 Gy            | 0                 | 1   | PR                                                              | 0       | 6.0         | 6.0         | 0         |
| Fabi et al. 2005 <sup>111</sup>             | Case Report – V  | 1 / 0          | 53         | Soft Tissue                    | 24.0         | B   | Diffuse                              | Muscle                            | 0   | D, Pro                                                                                                                         | N/A        | Biopsy                                  | N/A                       | 1         | 1, 30 Gy            | 0                 | 1   | PD                                                              | 0       | 7.0         | 7.0         | 1         |
| Gupta et al. 2005 <sup>112</sup>            | Case Report – V  | 1 / 0          | 45         | Liver                          | 0            | L   | Superolateral                        | Bone                              | 1   | IM, Mass, Pro                                                                                                                  | N/A        | Biopsy                                  | N/A                       | 0         | 0                   | 0                 | 0   | PD                                                              | 0       | 1.0         | 1.0         | 1         |
| Hart et al. 2005 <sup>113</sup>             | Case Report – V  | 1 / 0          | 70         | Kidney                         | 18.0         | L   | Lateral                              | Muscle                            | 0   | D, IM, Pro, S                                                                                                                  | N/A        | Biopsy                                  | N/A                       | N/A       | N/A                 | N/A               | N/A | N/A                                                             | 0       | 1.0         | 1.0         | 1         |
| Konuk et al. 2005 <sup>114</sup>            | Case Report – V  | 1 / 0          | 44         | Soft Tissue                    | 36.0         | L   | Superolateral                        | Soft Tissue                       | 1   | DV, Pro, RAPD                                                                                                                  | N/A        | Partial                                 | Decompressi<br>on         | 0         | 1, 30 Gy            | 0                 | 0   | PR                                                              | 0       | 6.0         | 6.0         | 1         |
| Mohadjer et al. 2005 <sup>115</sup>         | Case Report – V  | 1 / 1          | 50         | Breast                         | 0            | R   | Superolateral                        | Fat                               | N/A | OP, Pro                                                                                                                        | N/A        | Biopsy                                  | N/A                       | 1         | 1, 30 Gy            | 0                 | 1   | PR                                                              | 0       | 120.0       | 120.0       | 1         |
| Puglisi et al. 2005 <sup>116</sup>          | Case Report – V  | 1 / 0          | 53         | Gallbladder                    | 1.0          | R   | Lateral                              | Muscle                            | 0   | Pro                                                                                                                            | N/A        | FNAB                                    | N/A                       | 1         | 1                   | 0                 | 0   | PD                                                              | 0       | 6.0         | 6.0         | 1         |
| Aralikatti et al. 2006 <sup>117</sup>       | Case Report – V  | 1 / 0          | 63         | Esophagus                      | 5.0          | L   | Superolateral                        | Soft Tissue                       | 1   | Mass, S                                                                                                                        | N/A        | Biopsy                                  | N/A                       | 0         | 1                   | 0                 | 0   | PD                                                              | 0       | 2.0         | 2.0         | 0         |
| Lee et al. 2006 <sup>118</sup>              | Case Report – V  | 1 / 0          | 56         | Stomach                        | 0            | R   | Posterior                            | Soft Tissue                       | 0   | D                                                                                                                              | N/A        | Complete                                | N/A                       | 1         | 0                   | 0                 | 1   | SD                                                              | 0       | 12.0        | 12.0        | 1         |
| Mehta et al. 2006 <sup>119</sup>            | Case Series – IV | 13 / 4 (30.8%) | 68 (40-75) | 13 Carcinoid (100%)            | N/A          | N/A | N/A                                  | 7 Muscle (53.8%)<br>6 Fat (46.1%) | N/A | 9 Pro (69.2%)<br>4 DV (30.8%)<br>4 IM (30.8%)<br>2 D (15.4%)<br>1 Mass (7.7%)<br>1 No sympt (7.7%)                             | N/A        | 13 Surgery (100%)<br>4 Complete (30.8%) | 4Exenteratio<br>n (30.8%) | 1 (7.7%)  | 9 (69.2%)           | N/A               | N/A | N/A                                                             | N/A     | N/A         | N/A         | N/A       |
| Oida et al. 2006 <sup>120</sup>             | Case Report – V  | 1 / 0          | 72         | Liver                          | 120.0        | L   | Superolateral                        | Soft Tissue                       | 1   | D, DV                                                                                                                          | Osteolytic | Partial                                 | Decompressi<br>on         | 0         | 0                   | 0                 | 1   | PR                                                              | 0       | 4.0         | 4.0         | 0         |
| Schick et al. 2006 <sup>121</sup>           | Case Series – IV | 10 / 4 (40%)   | N/A        | 5 Lung (50%)<br>3 Breast (30%) | 3.0 (0-132)  | N/A | 7 Posterior (70%)<br>3 Diffuse (20%) | 6 Soft Tissue (60%)               | 0   | N/A                                                                                                                            | N/A        | 3 Complete (30%)                        | N/A                       | 4 (40%)   | 4 (40%)             | 1 Hormonal        | N/A | N/A                                                             | 3 (30%) | 11.0 (1-36) | 11.5 (1-36) | 1 (10%)   |

|                                              |                  |       |              | 1 CUP (10%)     |             |                        | 4 Bone (40%)                        |                                     |          |                                                         | 3 Partial (30%)     |               |              |         |                   |          |     |             |   |             |             |          |  |
|----------------------------------------------|------------------|-------|--------------|-----------------|-------------|------------------------|-------------------------------------|-------------------------------------|----------|---------------------------------------------------------|---------------------|---------------|--------------|---------|-------------------|----------|-----|-------------|---|-------------|-------------|----------|--|
|                                              |                  |       |              | 1 Uterus (10%)  |             |                        |                                     |                                     |          |                                                         |                     |               |              |         |                   |          |     |             |   |             |             |          |  |
| Sharma et al.<br>2006 <sup>122</sup>         | Case Report – V  | 1 / 0 | 69           | Kidney          | 0           | L                      | Superolateral                       | Soft Tissue                         | 1        | Mass, Pro, Pt                                           | Osteolytic          | Biopsy        | N/A          | 0       | 1                 | 0        | 1   | PR          | 0 | 4.0         | 4.0         | 1        |  |
| Singh et al.<br>2006 <sup>123</sup>          | Case Report – V  | 1 / 1 | 45           | Ovary           | 36.0        | L                      | Posterior                           | Fat                                 | 0        | OP, S                                                   | N/A                 | Partial       | N/A          | 0       | 0                 | 0        | 0   | PD          | 0 | 2.0         | 2.0         | 0        |  |
| Solari et al.<br>2006 <sup>124</sup>         | Case Series – IV | 1 / 1 | 81           | Breast          | 24.0        | L                      | Superolateral                       | Soft Tissue                         | 0        | Mass, Pro, RE                                           | N/A                 | Biopsy        | N/A          | 0       | 1                 | 0        | 1   | PR          | 0 | 3.0         | 3.0         | 1        |  |
| Tumuluri et al.<br>2006 <sup>125</sup>       | Case Report – V  | 1 / 1 | 75           | Esophagus       | 6.0         | L                      | Medial                              | Soft Tissue                         | 0        | D, OP, Pt                                               | N/A                 | Biopsy        | N/A          | 0       | 1                 | 0        | 1   | PR          | 0 | 12.0        | 12.0        | 1        |  |
| Yunker et al.<br>2006 <sup>126</sup>         | Case Report – V  | 1 / 1 | 69           | Stomach         | 0           | L                      | Superomedial                        | Soft Tissue                         | 0        | D, IM, Mass, Pt                                         | N/A                 | Biopsy        | N/A          | N/A     | N/A               | N/A      | N/A | N/A         | 0 | 2.0         | 2.0         | 1        |  |
| Char et al.<br>2007 <sup>127</sup>           | Case Report – V  | 1 / 1 | 87           | Uterus          | 8.0         | R                      | Superior                            | Fat                                 | 0        | OP, Pt, S                                               | N/A                 | Complete      | N/A          | N/A     | N/A               | N/A      | N/A | N/A         | 0 | 2.0         | 2.0         | 1        |  |
| Gerencer et al.<br>2007 <sup>128</sup>       | Case Report – V  | 1 / 1 | 58           | Carcinoid       | 12.0        | R                      | Medial                              | Muscle                              | 0        | D, IM, VL                                               | N/A                 | Biopsy        | N/A          | 0       | 1, 44 Gy          | 0        | 1   | PR          | 0 | 24.0        | 24.0        | 1        |  |
| Isshiki et al.<br>2007 <sup>129</sup>        | Case Report – V  | 1 / 0 | 70           | Prostate        | 0           | L                      | Superolateral                       | Bone                                | 1        | DV, IM, Pro                                             | Osteolytic          | Complete      | N/A          | 0       | 0                 | 0        | 1   | CR          | 0 | 12.0        | 12.0        | 1        |  |
| Lin et al.<br>2007 <sup>130</sup>            | Case Report – V  | 1 / 0 | 60           | Bladder         | 8.0         | R                      | Superomedial                        | Soft Tissue                         | 0        | D, DV, Pro                                              | N/A                 | Biopsy        | N/A          | 1       | 0                 | 0        | 0   | PR          | 0 | 6.0         | 6.0         | 1        |  |
| Mani et al.<br>2007 <sup>131</sup>           | Case Report – V  | 1 / 1 | 65           | Larynx          | 5.0         | R                      | Superomedial                        | Bone                                | 0        | D, DV                                                   | Osteolytic          | Biopsy        | N/A          | 0       | 0                 | 0        | 0   | PD          | 0 | 1.0         | 1.0         | 0        |  |
| Su et al.<br>2007 <sup>132</sup>             | Case Report – V  | 1 / 1 | 55           | Uterus          | 18.0        | R                      | Superolateral                       | Soft Tissue                         | 1        | DV, Pro, RAPD                                           | Osteolytic          | Complete      | Exenteration | 0       | 1, 50 Gy          | 0        | 1   | PR          | 0 | 12.0        | 12.0        | 1        |  |
| Talwar et al.<br>2007 <sup>133</sup>         | Case Report – V  | 1 / 1 | 30           | Breast          | 15.0        | R                      | Lateral                             | Muscle                              | 0        | Pro, S                                                  | N/A                 | Partial       | N/A          | 0       | 1                 | Hormonal | 1   | PR          | 0 | 3.0         | 3.0         | 1        |  |
| Torres et al.<br>2007 <sup>134</sup>         | Case Series – IV | 2 / 0 | 65.5 (53-78) | 2 Breast (100%) | 26.0 (4-48) | 1 L (50%)<br>1 R (50%) | 1 Lateral (50%)<br>1 Superior (50%) | 1 Bone (50%)<br>1 Soft Tissue (50%) | 0        | 2 IM (100%)<br>1 D (50%)<br>1 Mass (50%)<br>1 Pro (50%) | N/A                 | 2 Partial     | N/A          | 1 (50%) | 0                 | 0        | 2   | N/A         | 0 | 17.0 (2-32) | 17.0 (2-32) | 2 (100%) |  |
| Uluocak et al.<br>2007 <sup>135</sup>        | Case Report – V  | 1 / 0 | 73           | Prostate        | 0           | L                      | Superolateral                       | Soft Tissue                         | 1        | OP, Pro, VL                                             | Osteolytic          | FNAB          | N/A          | 0       | 0                 | Hormonal | 1   | PR          | 0 | 12.0        | 12.0        | 0        |  |
| Alsuhaibani et al.<br>2008 <sup>136</sup>    | Case Report – V  | 1 / 0 | 90           | Prostate        | 12.0        | L                      | Medial                              | Muscle                              | 0        | D, OP                                                   | N/A                 | Biopsy        | N/A          | 0       | 1                 | 0        | 1   | PR          | 0 | 8.0         | 8.0         | 0        |  |
| Hatton et al.<br>2008 <sup>137</sup>         | Case Report – V  | 1 / 1 | 24           | Soft Tissue     | 24.0        | B                      | Doffise                             | Muscle                              | 0        | IM, Pro, RAPD, S                                        | N/A                 | Biopsy        | N/A          | 0       | 1                 | 0        | 0   | PD          | 0 | 2.0         | 2.0         | 0        |  |
| Henning et al.<br>2008 <sup>138</sup>        | Case Report – V  | 1 / 0 | 60           | Lung            | 0           | R                      | Superomedial                        | Bone                                | 0        | D, Pro, S                                               | N/A                 | Biopsy        | N/A          | 1       | 0                 | 0        | 0   | PD          | 0 | 6.0         | 6.0         | 0        |  |
| Hirunwiwatkul et al.<br>2008 <sup>139</sup>  | Case Report – V  | 1 / 1 | 74           | Liver           | 0           | R                      | Lateral                             | Bone                                | 1        | DV, IM, OP, Pro, Pt, RAPD                               | Osteolytic          | Biopsy        | N/A          | 1       | 1                 | 0        | 0   | PD          | 0 | 2.0         | 2.0         | 0        |  |
| Kiratli et al.<br>2008 <sup>140</sup>        | Case Report – V  | 1 / 0 | 74           | Carcinoid       | 36.0        | R                      | Inferior                            | Muscle                              | 0        | D, Pro                                                  | N/A                 | Complete      | N/A          | 1       | 0                 | 0        | 1   | PR          | 0 | 24.0        | 24.0        | 1        |  |
| Kuo et al.<br>2008 <sup>141</sup>            | Case Report – V  | 1 / 1 | 66           | Breast          | £1.0        | R                      | Superior                            | Fat                                 | 0        | S                                                       | N/A                 | Biopsy        | N/A          | 1       | 0                 | 0        | 1   | CR          | 0 | 3.0         | 3.0         | 1        |  |
| Milman et al.<br>2008 <sup>142</sup>         | Case Report – V  | 1 / 1 | 83           | Breast          | 336.0       | L                      | Diffuse                             | Muscle                              | 0        | IM, Mass                                                | N/A                 | Partial       | N/A          | 1       | 0                 | Hormonal | 1   | PR          | 0 | 15.0        | 15.0        | 1        |  |
| Mudiyanseelage et al.<br>2008 <sup>143</sup> | Case Report – V  | 1 / 1 | 60           | Kidney          | 0           | L                      | Medial                              | Muscle                              | 0        | D, Pro                                                  | N/A                 | Complete      | N/A          | 1       | 0                 | 0        | 1   | N/A         | 0 | 3.0         | 3.0         | 1        |  |
| Peng et al.<br>2008 <sup>144</sup>           | Case Report – V  | 1 / 0 | 72           | Prostate        | 0           | L                      | Inferomedial                        | Soft Tissue                         | 0        | Mass, Pro                                               | N/A                 | Complete      | Exenteration | N/A     | N/A               | N/A      | N/A | N/A         | 0 | 60.0        | 60.0        | 1        |  |
| Pitts et al.<br>2008 <sup>145</sup>          | Case Series – IV | 2 / 1 | 54 (47-61)   | 2 Liver (100%)  | 0           | 2 L (100%)             | 2 Lateral (100%)                    | 2 Soft Tissue (100%)                | 2 (100%) | 1 OP, Pro (50%)<br>1 DV, S (50%)<br>1 RAPD (50%)        | 2 Osteolytic (100%) | 2 FNAB (100%) | N/A          | 0       | 1 (50%),<br>10 Gy | 0        | 0   | 2 PD (100%) | 0 | 1 (0.5-2)   | 1 (0.5-2)   | 0        |  |
| Polito et al.<br>2008 <sup>146</sup>         | Case Report – V  | 1 / 0 | 65           | Breast          | 60.0        | L                      | Inferior                            | Fat                                 | 0        | En                                                      | 0                   | Biopsy        | N/A          | 0       | 1, 30 Gy          | 0        | 1   | PR          | 0 | 15.0        | 15.0        | 0        |  |
| Preechawal et al.<br>2008 <sup>147</sup>     | Case Report – V  | 1 / 0 | 48           | Kidney          | 0           | L                      | Superior                            | Muscle                              | 0        | IM, Mass, Pro, Pt                                       | N/A                 | Biopsy        | N/A          | 0       | 0                 | 0        | 0   | PD          | 0 | 2.0         | 2.0         | 0        |  |

|                                                        |                  |               |    |                                                                                                                                                                                                                                           |       |                                            |                                                                                        |                                                               |   |                                                                                                                 |                     |                                                         |               |            |            |                     |     |     |   |      |      |     |
|--------------------------------------------------------|------------------|---------------|----|-------------------------------------------------------------------------------------------------------------------------------------------------------------------------------------------------------------------------------------------|-------|--------------------------------------------|----------------------------------------------------------------------------------------|---------------------------------------------------------------|---|-----------------------------------------------------------------------------------------------------------------|---------------------|---------------------------------------------------------|---------------|------------|------------|---------------------|-----|-----|---|------|------|-----|
| <b>Rocha Filho et al. 2008</b> <sup>148</sup>          | Case Report – V  | 1 / 1         | 66 | Thyroid                                                                                                                                                                                                                                   | 0     | R                                          | Superolateral                                                                          | Bone                                                          | 0 | Pro                                                                                                             | N/A                 | Biopsy                                                  | N/A           | 1          | 1, 37.5 Gy | 0                   | 0   | SD  | 0 | 3.0  | 3.0  | 1   |
| <b>Seiff et al. 2008</b> <sup>149</sup>                | Case Report – V  | 1 / 1         | 46 | Thyroid                                                                                                                                                                                                                                   | 256.0 | L                                          | Inferior                                                                               | Muscle                                                        | 0 | Mass, Pro                                                                                                       | N/A                 | Partial                                                 | N/A           | 0          | 0          | 0                   | 1   | PR  | 0 | 2.0  | 2.0  | 1   |
| <b>Souayah et al. 2008</b> <sup>150</sup>              | Case Report – V  | 1 / 0         | 49 | Stomach                                                                                                                                                                                                                                   | 0     | R                                          | Lateral                                                                                | Muscle                                                        | 0 | D, IM, S                                                                                                        | N/A                 | Biopsy                                                  | N/A           | 0          | 1          | 0                   | 0   | PD  | 0 | 2.5  | 2.5  | 0   |
| <b>Surace et al. 2008</b> <sup>151</sup>               | Case Report – V  | 1 / 1         | 73 | Breast                                                                                                                                                                                                                                    | 420.0 | L                                          | Diffuse                                                                                | Muscle                                                        | 0 | D, En, IM, Pt                                                                                                   | N/A                 | Biopsy                                                  | N/A           | 0          | 0          | Hormonal            | 1   | PR  | 0 | 3.0  | 3.0  | 1   |
| <b>Gosslee et al. 2009</b> <sup>152</sup>              | Case Report – V  | 1 / 1         | 36 | Cervix                                                                                                                                                                                                                                    | 30.0  | L                                          | Superolateral                                                                          | Bone                                                          | 0 | IM, Mass, OP, S                                                                                                 | N/A                 | Partial                                                 | N/A           | 0          | 1          | 0                   | 1   | PR  | 0 | 3.0  | 3.0  | 1   |
| <b>Nirmala et al. 2009</b> <sup>153</sup>              | Case Report – V  | 1 / 0         | 62 | Thymus                                                                                                                                                                                                                                    | 19.0  | L                                          | Medial                                                                                 | Soft Tissue                                                   | 0 | DV, Pro                                                                                                         | N/A                 | FNAB                                                    | N/A           | 0          | 1, 40 Gy   | 0                   | 1   | PR  | 0 | 3.0  | 3.0  | 1   |
| <b>Slagle et al. 2009</b> <sup>154</sup>               | Case Report – V  | 1 / 0         | 61 | CUP                                                                                                                                                                                                                                       | 0     | R                                          | Superior                                                                               | Muscle                                                        | 0 | D, OP                                                                                                           | Osteolytic          | FNAB                                                    | N/A           | 0          | 1, 33 Gy   | 0                   | 0   | PD  | 0 | 6.0  | 6.0  | 1   |
| <b>Valenzuela et al. 2009</b> <sup>155</sup>           | Case Series – IV | 80 / 36 (45%) | 60 | 23 Breast (28.7%)<br>16 Melanoma (20%)<br>10 Prostate (12.5%)<br>7 Carcinoid (8.8%)<br>6 Skin (7.5%)<br>5 Lung (6.3%)<br>3 Colorectal (3.8%)<br>3 Salivary (3.8%)<br>2 Bone (2.5%)<br>2 Ovary (2.5%)<br>2 Uterus (2.5%)<br>1 Liver (1.2%) | N/A   | 39 L (48.8%)<br>39 R (48.8%)<br>2 B (2.5%) | 18 Medial (22.5%)<br>14 Lateral (17.5%)<br>11 Posterior (13.8%)<br>11 Superior (13.8%) | 34 Fat (42.5%)<br>22 Muscle (27.5%)<br>22 Soft Tissue (27.5%) | 0 | 39 D (48.8%)<br>33 OP (41.2%)<br>24 VL (30%)<br>23 Pro (28.8%)<br>20 S (25%)<br>13 Pt (16.3%)<br>9 Mass (11.3%) | 6 Osteolytic (7.5%) | 58 Biopsy (72.5%)<br>14 FNAB (17.5%)<br>8 Partial (10%) | N/A           | 19 (23.8%) | 54 (67.5%) | 18 Hormonal (22.5%) | N/A | N/A | 0 | 18.0 | 18.0 | N/A |
| <b>Barahimi et al. 2010</b> <sup>156</sup>             | Case Report – V  | 1 / 0         | 68 | Prostate                                                                                                                                                                                                                                  | 72.0  | R                                          | Lateral                                                                                | Soft Tissue                                                   | 0 | IM, OP, Pt, RE, S                                                                                               | N/A                 | Biopsy                                                  | N/A           | 0          | 0          | 0                   | 0   | PD  | 0 | 8.0  | 8.0  | 0   |
| <b>Foo et al. 2010</b> <sup>157</sup>                  | Case Report – V  | 1 / 0         | 71 | Pancreas                                                                                                                                                                                                                                  | 0     | L                                          | Lateral                                                                                | Soft Tissue                                                   | 0 | D, DV, OP, RAPD                                                                                                 | N/A                 | Partial                                                 | Decompression | 0          | 1          | 0                   | 0   | SD  | 0 | 1.0  | 1.0  | 0   |
| <b>Francone et al. 2010</b> <sup>158</sup>             | Case Report – V  | 1 / 1         | 66 | Breast                                                                                                                                                                                                                                    | 0     | R                                          | Inferior                                                                               | Soft Tissue                                                   | 0 | S                                                                                                               | N/A                 | Biopsy                                                  | N/A           | 1          | 1          | Hormonal            | 1   | PR  | 0 | 12.0 | 12.0 | 1   |
| <b>Hassane et al. 2010</b> <sup>159</sup>              | Case Report – V  | 1 / 0         | 61 | Esophagus                                                                                                                                                                                                                                 | 0     | L                                          | Superolateral                                                                          | Bone                                                          | 1 | OP, Mass                                                                                                        | Osteolytic          | Biopsy                                                  | N/A           | 0          | 0          | 0                   | 0   | PD  | 0 | 1.0  | 1.0  | ‘   |
| <b>Matsuo et al. 2010</b> <sup>160</sup>               | Case Report – V  | 1 / 1         | 72 | Carcinoid                                                                                                                                                                                                                                 | 9.0   | R                                          | Medial                                                                                 | Muscle                                                        | 0 | DV, S                                                                                                           | N/A                 | Partial                                                 | N/A           | 0          | 1, 44 Gy   | 0                   | 0   | SD  | 0 | 3.0  | 3.0  | 1   |
| <b>Ng et al. 2010</b> <sup>161</sup>                   | Case Report – V  | 1 / 0         | 55 | Esophagus                                                                                                                                                                                                                                 | 12.0  | B                                          | Superior                                                                               | Soft Tissue                                                   | 0 | Pro, Pt                                                                                                         | N/A                 | Biopsy                                                  | N/A           | 1          | 1, 30 Gy   | 0                   | 1   | PR  | 0 | 3.0  | 3.0  | 0   |
| <b>Patel et al. 2010</b> <sup>162</sup>                | Case Report – V  | 1 / 0         | 69 | Prostate                                                                                                                                                                                                                                  | 0     | R                                          | Superior                                                                               | Bone                                                          | 1 | Pro, Pt                                                                                                         | Osteoblastic        | Biopsy                                                  | Decompression | 0          | 0          | Hormonal            | 1   | PR  | 0 | 6.0  | 6.0  | 1   |
| <b>Eckardt et al. 2011</b> <sup>163</sup>              | Case Report – V  | 1 / 1         | 63 | Breast                                                                                                                                                                                                                                    | 36.0  | L                                          | Superolateral                                                                          | Bone                                                          | 1 | D, OP, Pro                                                                                                      | Osteolytic          | Biopsy                                                  | N/A           | 1          | 0          | Hormonal            | 1   | N/A | 0 | 3.0  | 3.0  | 1   |
| <b>Galm et al. 2011</b> <sup>164</sup>                 | Case Report – V  | 1 / 0         | 75 | Larynx                                                                                                                                                                                                                                    | 10.0  | L                                          | Superior                                                                               | Soft Tissue                                                   | 0 | OP, RAPD, RE                                                                                                    | N/A                 | Biopsy                                                  | N/A           | 0          | 0          | 0                   | 0   | PD  | 0 | 1.0  | 1.0  | 0   |
| <b>Guerriero et al. 2011</b> <sup>165</sup>            | Case Report – V  | 1 / 0         | 45 | Liver                                                                                                                                                                                                                                     | 288.0 | L                                          | Superolateral                                                                          | Soft Tissue                                                   | 0 | D, Mass, OP, Pro                                                                                                | Osteolytic          | Biopsy                                                  | N/A           | 0          | 1          | 0                   | 1   | PR  | 0 | 3.0  | 3.0  | 1   |
| <b>Gupta et al. 2011</b> <sup>166</sup>                | Case Report – V  | 1 / 1         | 46 | Breast                                                                                                                                                                                                                                    | 0     | L                                          | Inferomedial                                                                           | Muscle                                                        | 0 | OP, S                                                                                                           | N/A                 | Complete                                                | N/A           | 0          | 0          | 0                   | 1   | CR  | 0 | 6.0  | 6.0  | 1   |
| <b>Janicijevic-Petrovic et al. 2011</b> <sup>167</sup> | Case Report – V  | 1 / 1         | 45 | Breast                                                                                                                                                                                                                                    | 0     | R                                          | Posterior                                                                              | Soft Tissue                                                   | 0 | Pro                                                                                                             | N/A                 | Biopsy                                                  | N/A           | N/A        | N/A        | N/A                 | N/A | N/A | 0 | 3.0  | 3.0  | 1   |
| <b>Konoglou et al. 2011</b> <sup>168</sup>             | Case Report – V  | 1 / 0         | 69 | Lung                                                                                                                                                                                                                                      | 0     | R                                          | Inferolateral                                                                          | Fat                                                           | 0 | Pro                                                                                                             | N/A                 | FNAB                                                    | N/A           | 1          | 0          | 0                   | 1   | CR  | 0 | 4.0  | 4.0  | 0   |
| <b>Li et al. 2011</b> <sup>169</sup>                   | Case Report – V  | 1 / 0         | 26 | Small bowel                                                                                                                                                                                                                               | 72.0  | L                                          | Superolateral                                                                          | Bone                                                          | 1 | D, Pro                                                                                                          | Osteolytic          | Partial                                                 | N/A           | 1          | 1          | 0                   | 1   | PR  | 0 | 3.0  | 3.0  | 1   |
| <b>Murthy et al. 2011</b> <sup>170</sup>               | Case Report – V  | 1 / 1         | 61 | Breast                                                                                                                                                                                                                                    | 24.0  | B                                          | Diffuse                                                                                | Muscle                                                        | 0 | D, IM                                                                                                           | N/A                 | Biopsy                                                  | N/A           | 0          | 1, 54 Gy   | Hormonal            | 1   | PR  | 0 | 18.0 | 18.0 | 1   |



|                                            |                  |              |               |                       |               |                                            |                                                                                                                                         |                                                  |           |                                                                                                                 |                         |          |                   |                     |                            |                   |                                                 |     |                |                |                |           |
|--------------------------------------------|------------------|--------------|---------------|-----------------------|---------------|--------------------------------------------|-----------------------------------------------------------------------------------------------------------------------------------------|--------------------------------------------------|-----------|-----------------------------------------------------------------------------------------------------------------|-------------------------|----------|-------------------|---------------------|----------------------------|-------------------|-------------------------------------------------|-----|----------------|----------------|----------------|-----------|
| Mustapha et al.<br>2011 <sup>171</sup>     | Case Report – V  | 1 / 0        | 25            | Liver                 | 0             | R                                          | Superolateral                                                                                                                           | Soft Tissue                                      | 0         | DV, Pro, S                                                                                                      | N/A                     | FNAB     | N/A               | 0                   | 0                          | 0                 | 0                                               | N/A | 0              | 1.0            | 1.0            | 0         |
| Rosado et al.<br>2011 <sup>172</sup>       | Case Report – V  | 1 / 0        | 74            | Prostate              | 60.0          | R                                          | Superolateral                                                                                                                           | Bone                                             | 1         | D, IM, Pro                                                                                                      | Osteolytic              | Biopsy   | N/A               | 0                   | 0                          | Hormonal          | 1                                               | PR  | 0              | 8.0            | 8.0            | 0         |
| Zarogoulidis et al.<br>2011 <sup>173</sup> | Case Report – V  | 1 / 1        | 38            | Lung                  | 0             | R                                          | Posterio                                                                                                                                | Soft Tissue                                      | 0         | D                                                                                                               | N/A                     | FNAB     | N/A               | 1                   | 1, 30 Gy                   | 0                 | 1                                               | N/A | 0              | 3.0            | 3.0            | 1         |
| Charles et al.<br>2012 <sup>174</sup>      | Case Report – V  | 1 / 0        | 24            | Colorectal            | 7.0           | L                                          | Superior                                                                                                                                | Soft Tissue                                      | 0         | Mass, Pro                                                                                                       | N/A                     | Biopsy   | N/A               | 1                   | 1                          | 0                 | 1                                               | N/A | 0              | 3.0            | 3.0            | 1         |
| Chen et al.<br>2012 <sup>175</sup>         | Case Report – V  | 1 / 1        | 51            | Soft Tissue           | 72.0          | L                                          | Medial                                                                                                                                  | Muscle                                           | 0         | D, DV, Pro                                                                                                      | N/A                     | Partial  | N/A               | 0                   | 0                          | 0                 | 1                                               | N/A | 0              | 12.0           | 12.0           | 1         |
| Dmuchowska et al.<br>2012 <sup>176</sup>   | Case Report – V  | 1 / 1        | 53            | Breast                | 0             | R                                          | Superior                                                                                                                                | Bone                                             | 1         | IM, Pt                                                                                                          | N/A                     | Partial  | N/A               | 0                   | 1                          | 0                 | 1                                               | N/A | 0              | 3.0            | 3.0            | 1         |
| Jiang et al.<br>2012 <sup>177</sup>        | Case Report – V  | 1 / 0        | 44            | Liver                 | 17.0          | B                                          | Diffuse                                                                                                                                 | Muscle                                           | 0         | D, IM, Pro                                                                                                      | N/A                     | Biopsy   | N/A               | 0                   | 1                          | 0                 | 1                                               | N/A | 0              | 3.0            | 3.0            | 1         |
| Jung et al.<br>2012 <sup>178</sup>         | Case Report – V  | 1 / 0        | 50            | Kidney                | 72.0          | L                                          | Medial                                                                                                                                  | Soft Tissue                                      | 0         | IM, Pro                                                                                                         | Osteolytic              | Complete | Exenteration      | 0                   | 0                          | Immunothera<br>py | 1                                               | CR  | 0              | 72.0           | 72.0           | 1         |
| Kim et al.<br>2012 <sup>179</sup>          | Case Report – V  | 1 / 1        | 50            | Breast                | 0             | R                                          | Diffuse                                                                                                                                 | Soft Tissue                                      | 0         | D, Pro, S                                                                                                       | N/A                     | Biopsy   | Decompressi<br>on | 1                   | 0                          | Hormonal          | 1                                               | N/A | 0              | 3.0            | 3.0            | 1         |
| Pecen et al.<br>2012 <sup>180</sup>        | Case Report – V  | 1 / 0        | 59            | Liver                 | 0             | R                                          | Posterior                                                                                                                               | Fat                                              | 0         | D, IM, Pro, Pt, S                                                                                               | N/A                     | Complete | Exenteration      | 1                   | 0                          | 0                 | 1                                               | N/A | 0              | 7.0            | 7.0            | 0         |
| SooHoo et al.<br>2012 <sup>181</sup>       | Case Report – V  | 1 / 1        | 53            | Bladder               | 1.0           | R                                          | Superolateral                                                                                                                           | Soft Tissue                                      | 0         | Pt                                                                                                              | N/A                     | Biopsy   | N/A               | 0                   | 0                          | 0                 | N/A                                             | N/A | 0              | 3.0            | 3.0            | 0         |
| Tomizawa et al.<br>2012 <sup>182</sup>     | Case Report – V  | 1 / 1        | 70            | Breast                | 0             | R                                          | Posterior                                                                                                                               | Fat                                              | 0         | DV, RE, S                                                                                                       | N/A                     | Biopsy   | N/A               | 0                   | 0                          | 0                 | 1                                               | N/A | 0              | 3.0            | 3.0            | 1         |
| Wladis et al.<br>2012 <sup>183</sup>       | Case Report – V  | 1 / 1        | 18            | Soft Tissue           | 18.0          | R                                          | Superomedial                                                                                                                            | Fat                                              | 0         | Mass, Pro                                                                                                       | N/A                     | Biopsy   | N/A               | 1                   | 1, 30 Gy                   | 0                 | 1                                               | PR  | 0              | 2.0            | 6.0            | 0         |
| Woo et al.<br>2012 <sup>184</sup>          | Case Report – V  | 1 / 1        | 65            | Small bowel           | 72.0          | L                                          | Lateral                                                                                                                                 | Fat                                              | 0         | Mass                                                                                                            | N/A                     | Partial  | N/A               | 0                   | 0                          | 0                 | 1                                               | N/A | 0              | 6.0            | 6.0            | 1         |
| Dobson et al.<br>2013 <sup>185</sup>       | Case Report – V  | 1 / 0        | 65            | Carcinoid             | 9.0           | L                                          | Inferomedial                                                                                                                            | Fat                                              | 0         | Mass                                                                                                            | N/A                     | Partial  | N/A               | 0                   | 0                          | Radioiodine       | 1                                               | PR  | 1              | 41.0           | 50.0           | 1         |
| Fini et al.<br>2013 <sup>186</sup>         | Case Report – V  | 1 / 1        | 70            | Breast                | 96.0          | B                                          | Diffuse                                                                                                                                 | Soft Tissue                                      | 0         | OP, Pt                                                                                                          | N/A                     | Partial  | N/A               | 0                   | 0                          | 0                 | 1                                               | N/A | 0              | 3.0            | 3.0            | 1         |
| Fujimoto et al.<br>2013 <sup>187</sup>     | Case Report – V  | 1 / 1        | 56            | Gallbladder           | 24.0          | L                                          | Lateral                                                                                                                                 | Bone                                             | 0         | OP, S                                                                                                           | Osteolytic              | Biopsy   | N/A               | 0                   | SRS                        | 0                 | 1                                               | PR  | 0              | 12.0           | 12.0           | 1         |
| Patel et al.<br>2013 <sup>188</sup>        | Case Report – V  | 1 / 0        | 57            | Soft Tissue           | 24.0          | L                                          | Lateral                                                                                                                                 | Soft Tissue                                      | 0         | Pro, RE                                                                                                         | N/A                     | Partial  | N/A               | 1                   | SRS                        | 0                 | 0                                               | PD  | 0              | 3.0            | 3.0            | 0         |
| Patel et al.<br>2013 <sup>189</sup>        | Case Report – V  | 1 / 1        | 47            | Breast                | 18.0          | R                                          | Medial                                                                                                                                  | Fat                                              | 0         | DV                                                                                                              | N/A                     | Biopsy   | N/A               | N/A                 | N/A                        | N/A               | N/A                                             | N/A | 0              | 3.0            | 3.0            | 1         |
| Coloma-Gonzalez et al. 2014 <sup>190</sup> | Case Report – V  | 1 / 0        | 56            | Kidney                | 0             | L                                          | Lateral                                                                                                                                 | Bone                                             | 0         | Mass, Pt                                                                                                        | Osteolytic              | Partial  | N/A               | 0                   | 0                          | Immunothera<br>py | 0                                               | PD  | 0              | 3.0            | 3.0            | 1         |
| Eldesouky et al.<br>2014 <sup>191</sup>    | Case Series – IV | 6 / 0        | 62<br>(55-70) | 6 Liver (100%)        | 6.0<br>(0-16) | 4 L (66.7%)<br>2 R (33.3%)                 | 6 Superolateral<br>(100%)                                                                                                               | 3 Soft Tissue<br>(50%)<br>3 Bone (50%)           | 1 (16.7%) | 5 Pro (83.3%)<br>2 Mass (33.3%)<br>1 IM (16.7%)<br>1 Pt (16.7%)<br>1 OP, RE, S<br>(16.7%)                       | 5 Osteolytic<br>(83.3%) | N/A      | N/A               | 6 (100%)            | 6 (100%)                   | 0                 | N/A                                             | N/A | 0              | 10.0<br>(6-10) | 10.0<br>(6-10) | 1 (16.7%) |
| Greene et al.<br>2014 <sup>192</sup>       | Case Series – IV | 15 / 3 (20%) | 66<br>(25-84) | 15 Melanoma<br>(100%) | N/A           | 11 L (73.3%)<br>2 B (13.3%)<br>2 R (13.3%) | 4 Medial (26.7%)<br>3 Posterior (20%)<br>3 Superior (20%)<br>2 Superomedial<br>(13.3%)<br>1 Diffuse (6.7%)<br>1 Superolateral<br>(6.7%) | 11 Soft Tissue<br>(73.3%)<br>4 Muscle<br>(26.7%) | N/A       | 9 Pro (60%)<br>7 IM (46.7%)<br>3 Pt (20%)<br>2 DV (13.3%)<br>2 OP (13.3%)<br>1 S (6.7%)<br>1 No sympt<br>(6.7%) | N/A                     | N/A      | 8 (53.3%)         | 7 (46.7%),<br>33 Gy | 5Immunother<br>apy (33.3%) | N/A               | 6 SD (40%)<br>4 PR<br>(26.7%)<br>1 PD<br>(6.7%) | 0   | 15.5<br>(1-84) | 15.5<br>(1-84) | 3 (20%)        |           |
| Kapur et al.<br>2014 <sup>193</sup>        | Case Report – V  | 1 / 0        | 79            | Prostate              | 0             | R                                          | Superolateral                                                                                                                           | Soft Tissue                                      | 0         | D, DV, Pro                                                                                                      | N/A                     | Biopsy   | N/A               | 1                   | 0                          | Hormonal          | 1                                               | PR  | 0              | 8.0            | 8.0            | 1         |

|                                               |                  |               |               |                                                                                                                                                                               |              |                            |                                       |                                         |           |                                                                                                                                |                       |                                                                               |                            |            |            |             |           |                              |   |               |               |          |
|-----------------------------------------------|------------------|---------------|---------------|-------------------------------------------------------------------------------------------------------------------------------------------------------------------------------|--------------|----------------------------|---------------------------------------|-----------------------------------------|-----------|--------------------------------------------------------------------------------------------------------------------------------|-----------------------|-------------------------------------------------------------------------------|----------------------------|------------|------------|-------------|-----------|------------------------------|---|---------------|---------------|----------|
| <b>Ludmir et al. 2014</b> <sup>194</sup>      | Case Report – V  | 1 / 0         | 82            | Colorectal                                                                                                                                                                    | 0            | R                          | Superomedial                          | Fat                                     | 0         | OP                                                                                                                             | N/A                   | Biopsy                                                                        | N/A                        | 0          | 1, 30 Gy   | 0           | 0         | PD                           | 0 | 6.0           | 6.0           | 0        |
| <b>Saffra et al. 2014</b> <sup>195</sup>      | Case Report – V  | 1 / 1         | 46            | Breast                                                                                                                                                                        | 0            | L                          | Medial                                | Muscle                                  | 0         | D, OP, Pt, RAPD                                                                                                                | N/A                   | Biopsy                                                                        | N/A                        | 1          | 0          | Hormonal    | 1         | PR                           | 0 | 12.0          | 12.0          | 1        |
| <b>Gupta et al. 2015</b> <sup>196</sup>       | Case Report – V  | 1 / 1         | 52            | Thyroid                                                                                                                                                                       | 0            | R                          | Lateral                               | Muscle                                  | 0         | D, DV, OP                                                                                                                      | N/A                   | Partial                                                                       | N/A                        | 0          | GK, 20 Gy  | 0           | 0         | PR                           | 0 | 18.0          | 18.0          | 1        |
| <b>Magliozzi et al. 2015</b> <sup>197</sup>   | Case Series – IV | 91 / 51 (56%) | N/A           | 36 Breast (39.6%)<br>16 CUP (<br>10 Lung<br>10 Kidney<br>4 Pharynx<br>4 Salivary<br>3 Melanoma<br>3 Pharynx<br>3 Skin<br>2 Smallbowel<br>1 Bladder<br>1 Prostate<br>1 Thyroid | 45.0         | 50 R (54.9%)<br>41 L (45%) | N/A                                   | N/A                                     | N/A       | 68 Pro (74.7%)<br>51 IM (56%)<br>43 Pt (47.3%)<br>40 DV (44%)<br>34 Mass (37.4%)<br>30 D (33%)<br>11 OP (12.1%)<br>4 En (4.4%) | 17 Osteolytic (18.7%) | 30 Biopsy (33%)<br>24 FNAB (26.4%)<br>32 Partial (35.2%)<br>5 Complete (5.5%) | 5Exenteratio<br>n (5.5%)   | 57 (62.6%) | 24 (26.4%) | 0           | N/A       | N/A                          | 0 | 13.5          | 13.5          | 2 (2.2%) |
| <b>Magrath et al. 2015</b> <sup>198</sup>     | Case Series – IV | 2 / 1 (50%)   | 54<br>(51-57) | 1 Bladder (50%)<br>1 Esophagus (50%)                                                                                                                                          | 0.5<br>(0-1) | 1 L (50%)<br>1 R (50%)     | 1 Posterior (50%)<br>1 Superior (50%) | 1 Fat (50%)<br>1 Soft Tissue (50%)      | 1 (50%)   | 2 IM (100%)<br>2 Pro (100%)<br>1 DV (50%)<br>1 OP (50%)                                                                        | N/A                   | 2 Biopsy (100%)                                                               | N/A                        | 0          | 1 (50%)    | 0           | 0         | SD                           | 0 | 3.0<br>(2-4)  | 3.0<br>(2-4)  | 1 (50%)  |
| <b>Pagsisihan et al. 2015</b> <sup>199</sup>  | Case Report – V  | 1 / 1         | 49            | Thyroid                                                                                                                                                                       | 0            | R                          | Superolateral                         | Bone                                    | 0         | D, DV, Mass, Pt                                                                                                                | Osteolytic            | Biopsy                                                                        | N/A                        | 0          | 0          | Radioiodine | 1         | PR                           | 0 | 6.0           | 6.0           | 1        |
| <b>Pearlman et al. 2015</b> <sup>200</sup>    | Case Report – V  | 1 / 0         | 33            | Colorectal                                                                                                                                                                    | 0            | R                          | Superior                              | Soft Tissue                             | 1         | D, DV, OP, Pro                                                                                                                 | Osteolytic            | Partial                                                                       | Decompressi<br>on          | 1          | 1          | 0           | 1         | PD                           | 1 | 11.0          | 11.0          | 0        |
| <b>Rajabi et al. 2015</b> <sup>201</sup>      | Case Report – V  | 1 / 0         | 19            | Bone                                                                                                                                                                          | 20.0         | L                          | Lateral                               | Soft Tissue                             | 0         | IM, Pro                                                                                                                        | Osteolytic            | Complete                                                                      | N/A                        | 1          | 1          | 0           | 1         | N/A                          | 0 | 3.0           | 3.0           | 1        |
| <b>Arthur et al. 2016</b> <sup>202</sup>      | Case Report – V  | 1 / 1         | 27            | Cervix                                                                                                                                                                        | 2.0          | L                          | Medial                                | Bone                                    | 0         | D, DV, Pro, RAPD                                                                                                               | N/A                   | Biopsy                                                                        | N/A                        | 1          | 1, 30 Gy   | 0           | 1         | PR                           | 0 | 12.0          | 12.0          | 1        |
| <b>Foster et al. 2016</b> <sup>203</sup>      | Case Report – V  | 1 / 1         | 67            | Colorectal                                                                                                                                                                    | 0            | L                          | Diffuse                               | Muscle                                  | 0         | D, Pro, RAPD                                                                                                                   | N/A                   | Biopsy                                                                        | N/A                        | 1          | 0          | 0           | 0         | N/A                          | 0 | 2.0           | 2.0           | 0        |
| <b>MacLean et al. 2016</b> <sup>204</sup>     | Case Report – V  | 1 / 0         | 39            | Thymus                                                                                                                                                                        | 0            | L                          | Medial                                | Soft Tissue                             | 0         | DV, IM, RAPD, S                                                                                                                | N/A                   | Partial                                                                       | Decompressi<br>on          | 1          | 1          | 0           | 1         | PR                           | 0 | 2.0           | 2.0           | 1        |
| <b>Pokharel et al. 2016</b> <sup>205</sup>    | Case Report – V  | 1 / 0         | 66            | Small bowel                                                                                                                                                                   | 0            | R                          | Superior                              | Fat                                     | 0         | Mass, Pro                                                                                                                      | N/A                   | Partial                                                                       | N/A                        | 0          | 0          | 0           | 1         | N/A                          | 0 | 2.0           | 2.0           | 1        |
| <b>Tabai et al. 2016</b> <sup>206</sup>       | Case Report – V  | 1 / 1         | 32            | Breast                                                                                                                                                                        | 0            | L                          | Medial                                | Bone                                    | 1         | D, OP, Pro                                                                                                                     | N/A                   | Biopsy                                                                        | N/A                        | 1          | 0          | 0           | 0         | N/A                          | 0 | 2.0           | 2.0           | 0        |
| <b>Tun et al. 2016</b> <sup>207</sup>         | Case Report – V  | 1 / 0         | 73            | Prostate                                                                                                                                                                      | 60.0         | L                          | Lateral                               | Bone                                    | 1         | DV, OP, Pro                                                                                                                    | Osteolytic            | Complete                                                                      | N/A                        | N/A        | N/A        | N/A         | N/A       | N/A                          | 0 | 2.0           | 2.0           | 1        |
| <b>AufferHeide et al. 2017</b> <sup>208</sup> | Case Report – V  | 1 / 0         | 52            | Prostate                                                                                                                                                                      | 0            | L                          | Lateral                               | Bone                                    | 1         | Mass, OP                                                                                                                       | Osteolytic            | Complete                                                                      | N/A                        | N/A        | N/A        | N/A         | N/A       | N/A                          | 0 | 2.0           | 2.0           | 1        |
| <b>Geske et al. 2017</b> <sup>209</sup>       | Case Series – IV | 3 / 1 (33.3%) | 59<br>(56-63) | 3 Liver (100%)                                                                                                                                                                | 0<br>(0-1)   | 2 L (66.7%)<br>1 R (33.3%) | 3 Superolateral (100%)                | 2 Bone (66.7%)<br>1 Soft Tissue (33.3%) | 1 (33.3%) | 2 Mass (66.7%)<br>2 RAPD (66.7%)<br>1 OP (33.3%)<br>1 VL (33.3%)                                                               | 2 Osteolytic (66.7%)  | 2 FNAB (66.7%)<br>1 Biopsy (33.3%)<br>1 Partial (33.3%)                       | 1Decompress<br>ion (33.3%) | 0          | 3 (100%)   | 0           | 1 (33.3%) | 2 PD (66.7%)<br>1 PR (33.3%) | 0 | 8.0<br>(1-11) | 8.0<br>(1-11) | 0        |
| <b>Huang et al. 2017</b> <sup>210</sup>       | Case Report – V  | 1 / 0         | 64            | Carcinoid                                                                                                                                                                     | 0            | L                          | Posterior                             | Soft Tissue                             | 0         | DV, OP, Pt                                                                                                                     | N/A                   | Complete                                                                      | N/A                        | 0          | 0          | 0           | 1         | N/A                          | 0 | 6.0           | 6.0           | 0        |
| <b>Marginean et al. 2017</b> <sup>211</sup>   | Case Report – V  | 1 / 1         | 56            | Breast                                                                                                                                                                        | 0            | L                          | Superolateral                         | Muscle                                  | 0         | D, DV, IM                                                                                                                      | N/A                   | Partial                                                                       | N/A                        | N/A        | N/A        | N/A         | N/A       | N/A                          | 0 | 1.0           | 1.0           | 1        |
| <b>Nabeel et al. 2017</b> <sup>212</sup>      | Case Report – V  | 1 / 1         | 48            | Colorectal                                                                                                                                                                    | 0            | R                          | Superolateral                         | Fat                                     | 0         | Pro, Pt                                                                                                                        | N/A                   | Biopsy                                                                        | N/A                        | 1          | 1          | 0           | 1         | N/A                          | 0 | 7.0           | 7.0           | 0        |
| <b>Nash et al. 2017</b> <sup>213</sup>        | Case Report – V  | 1 / 1         | 55            | Cervix                                                                                                                                                                        | 0            | L                          | Superomedial                          | Soft Tissue                             | 0         | OP, Pro, RE, S                                                                                                                 | N/A                   | Partial                                                                       | N/A                        | 0          | 0          | 0           | 0         | N/A                          | 0 | 1.0           | 1.0           | 0        |

|                                                           |                  |             |            |                                |             |                                     |                                                      |                                |          |                                                                         |                     |                                     |                          |         |            |                   |          |                          |   |             |             |         |
|-----------------------------------------------------------|------------------|-------------|------------|--------------------------------|-------------|-------------------------------------|------------------------------------------------------|--------------------------------|----------|-------------------------------------------------------------------------|---------------------|-------------------------------------|--------------------------|---------|------------|-------------------|----------|--------------------------|---|-------------|-------------|---------|
| <b>Rakul Nambiar et al. 2017</b> <sup>214</sup>           | Case Report – V  | 1 / 1       | 56         | Breast                         | 0           | L                                   | Superolateral                                        | Soft Tissue                    | 0        | IM, Pro                                                                 | N/A                 | Complete                            | N/A                      | 0       | 0          | Hormonal          | 1        | N/A                      | 0 | 7.0         | 7.0         | 1       |
| <b>Rasool et al. 2017</b> <sup>215</sup>                  | Case Report – V  | 1 / 1       | 48         | Soft Tissue                    | 0           | L                                   | Posterior                                            | Muscle                         | 0        | D, DV, OP, Pro                                                          | N/A                 | Complete                            | N/A                      | 1       | 1          | 0                 | 1        | CR                       | 0 | 18.0        | 18.0        | 1       |
| <b>Wang et al. 2017</b> <sup>216</sup>                    | Case Report – V  | 1 / 0       | 66         | Breast                         | 72.0        | R                                   | Superomedial                                         | Muscle                         | 0        | D, Pro                                                                  | N/A                 | Biopsy                              | N/A                      | 0       | 0          | Hormonal          | 1        | N/A                      | 0 | 8.0         | 8.0         | 1       |
| <b>Coutinho et al. 2018</b> <sup>217</sup>                | Case Report – V  | 1 / 1       | 68         | Breast                         | 0           | L                                   | Superolateral                                        | Muscle                         | 0        | D, DV Pro                                                               | N/A                 | Biopsy                              | N/A                      | 1       | 0          | 0                 | 1        | PR                       | 0 | 38.0        | 38.0        | 0       |
| <b>Das et al. 2018</b> <sup>218</sup>                     | Case Series – IV | 5 / 3 (60%) | 68 (61-72) | 5 Carcinoid (100%)             | 60 (12-244) | 3 B (60%)<br>1 L (20%)<br>1 R (20%) | 3 Diffuse (60%)<br>1 Lateral (20%)<br>1 Medial (20%) | 5 Muscle (100%)                | 0        | 3 D (60%)<br>1 OP (20%)<br>1 Pro (20%)<br>1 S (20%)<br>1 No sympt (20%) | N/A                 | N/A                                 | N/A                      | 2 (40%) | 4 (80%)    | 0                 | N/A      | 2 PR (40%)<br>2 SD (40%) | 0 | 6.0 (2-120) | 2.0 (2-120) | 4 (80%) |
| <b>Dutton et al. 2018</b> <sup>219</sup>                  | Case Report – V  | 1 / 0       | 33         | Testes                         | 22.0        | R                                   | Superolateral                                        | Soft Tissue                    | 0        | VL                                                                      | Osteolytic          | Partial                             | N/A                      | 1       | 1          | 0                 | 1        | CR                       | 1 | 9.0         | 48.0        | 1       |
| <b>Gulmez-Sevim et al. 2018</b> <sup>220</sup>            | Case Report – V  | 1 / 1       | 69         | Thyroid                        | 0           | R                                   | Superolateral                                        | Bone                           | 1        | D, DV, RAPD                                                             | Osteolytic          | Complete                            | N/A                      | 0       | 0          | Radioiodine       | N/A      | N/A                      | 0 | 3.0         | 3.0         | 1       |
| <b>Nifosi et al. 2018</b> <sup>221</sup>                  | Case Report – V  | 1 / 1       | 46         | Breast                         | 34.0        | L                                   | Medial                                               | Muscle                         | 0        | D, IM, OP, Pro                                                          | N/A                 | FNAB                                | N/A                      | 1       | SRS, 30 Gy | 0                 | 1        | PR                       | 0 | 3.0         | 3.0         | 1       |
| <b>Pinto-Proenca et al. 2018</b> <sup>222</sup>           | Case Report – V  | 1 / 1       | 66         | Breast                         | 0           | L                                   | Inferomedial                                         | Soft Tissue                    | 0        | Mass                                                                    | N/A                 | Partial                             | N/A                      | 1       | 0          | Hormonal          | 1        | PR                       | 0 | 60.0        | 60.0        | 1       |
| <b>Ramsey et al. 2018</b> <sup>223</sup>                  | Case Report – V  | 1 / 0       | 71         | Soft Tissue                    | 30.0        | L                                   | Superomedial                                         | Soft Tissue                    | 0        | D, Pt                                                                   | N/A                 | Complete                            | Exenteration             | 1       | 1, 64 Gy   | Immunothera<br>py | N/A      | N/A                      | 0 | 29.0        | 29.0        | 1       |
| <b>Roelofs et al. 2018</b> <sup>224</sup>                 | Case Report – V  | 1 / 1       | 66         | Small bowel                    | 84.0        | L                                   | Superior                                             | Muscle                         | 0        | DV, Pro                                                                 | N/A                 | Complete                            | N/A                      | 1       | 0          | 0                 | 1        | PR                       | 1 | 8.0         | 9.0         | 1       |
| <b>Rong et al. 2018</b> <sup>225</sup>                    | Case Report – V  | 1 / 0       | 51         | Pancreas                       | 0           | L                                   | Lateral                                              | Muscle                         | 0        | D, DV, RAPD                                                             | N/A                 | Partial                             | Decompressi<br>on        | N/A     | N/A        | N/A               | N/A      | N/A                      | 0 | 3.0         | 3.0         | 1       |
| <b>Shaikh et al. 2018</b> <sup>226</sup>                  | Case Report – V  | 1 / 0       | 58         | Breast                         | 0           | R                                   | Diffuse                                              | Sift Tissue                    | 0        | DV, Mass, OP                                                            | N/A                 | Biopsy                              | N/A                      | 1       | 0          | 0                 | N/A      | N/A                      | 0 | 3.0         | 3.0         | 1       |
| <b>Chumdermpadetsuk et al. 2019</b> <sup>227</sup>        | Case Report – V  | 1 / 0       | 22         | Kidney                         | 0           | R                                   | Superolateral                                        | Bone                           | 1        | D, DV, OP                                                               | Osteolytic          | Complete                            | N/A                      | 1       | SRS        | 0                 | 1        | CR                       | 0 | 6.0         | 6.0         | 1       |
| <b>Crisostomo et al. 2019</b> <sup>228</sup>              | Case Report – V  | 1 / 0       | 56         | Lung                           | 10.0        | L                                   | Medial                                               | Muscle                         | 0        | D, Pro, RAPD, RE                                                        | N/A                 | Biopsy                              | N/A                      | 0       | 0          | 0                 | 0        | N/A                      | 0 | 3.0         | 3.0         | 0       |
| <b>Cruzado-Sanchez et al. 2019</b> <sup>229</sup>         | Case Report – V  | 1 / 1       | 60         | Lung                           | 0           | R                                   | Superior                                             | Fat                            | 0        | IM, Mass, Pro                                                           | N/A                 | FNAB                                | N/A                      | N/A     | N/A        | N/A               | N/A      | N/A                      | 0 | 1.0         | 1.0         | 1       |
| <b>Espinosa-Barberi et al. 2019</b> <sup>230</sup>        | Case Series – IV | 2 / 1       | 66 (63-69) | 1 Breast (50%)<br>1 Lung (50%) | 6.0 (0-12)  | 1 B (50%)<br>1 R (50%)              | 1 Lateral (50%)<br>1 Superolateral (50%)             | 1 Bone (50%)<br>1 Muscle (50%) | 0        | 1 D, Pro, VL (50%)<br>1 D, IM, Pro (50%)                                | 1 Osteolytic (50%)  | 2 FNAB (100%)                       | N/A                      | 1 (50%) | 1 (50%)    | 1 Hormonal (50%)  | 1 (50%)  | 1 PD (50%)               | 0 | 2.5 (2-3)   | 2.5 (2-3)   | 1 (50%) |
| <b>Framarino-dei-Malatesta et al. 2019</b> <sup>231</sup> | Case Report – V  | 1 / 1       | 44         | Breast                         | 84.0        | R                                   | Inferior                                             | Muscle                         | 0        | D, DV, IM                                                               | N/A                 | Biopsy                              | N/A                      | 1       | SRS, 40 Gy | Hormonal          | 1        | PR                       | 0 | 20.0        | 20.0        | 1       |
| <b>Hernandez Pardines et al. 2019</b> <sup>232</sup>      | Case Report – V  | 1 / 1       | 58         | Breast                         | 0           | L                                   | Lateral                                              | Muscle                         | 0        | D, IM                                                                   | N/A                 | Biopsy                              | N/A                      | 1       | 0          | 0                 | 0        | SD                       | 0 | 2.0         | 2.0         | 1       |
| <b>Kagusa et al. 2019</b> <sup>233</sup>                  | Case Report – V  | 1 / 0       | 64         | Cervix                         | 7.0         | R                                   | Medial                                               | Soft Tissue                    | 0        | D, IM, Pro                                                              | N/A                 | Complete                            | N/A                      | 1       | 1, 60 Gy   | 0                 | 1        | PR                       | 0 | 2.0         | 2.0         | 0       |
| <b>Kiziloglu et al. 2019</b> <sup>234</sup>               | Case Report – V  | 1 / 1       | 63         | Breast                         | 12.0        | R                                   | Medial                                               | Muscle                         | 0        | D, IM                                                                   | N/A                 | Biopsy                              | N/A                      | 1       | 1, 45 Gy   | 0                 | 1        | PR                       | 0 | 15.0        | 15.0        | 1       |
| <b>Kluska et al. 2019</b> <sup>235</sup>                  | Case Report – V  | 1 / 1       | 63         | Breast                         | 132.0       | L                                   | Lateral                                              | Muscle                         | 0        | VL                                                                      | N/A                 | Partial                             | N/A                      | 0       | 0          | Hormonal          | 0        | N/A                      | 0 | 2.0         | 2.0         | 1       |
| <b>Kozubowska et al. 2019</b> <sup>236</sup>              | Case Report – V  | 1 / 0       | 73         | Carcinoid                      | 0           | R                                   | Inferomedial                                         | Soft Tissue                    | 0        | D, IM, OP, RE, S                                                        | N/A                 | Partial                             | Decompressi<br>on        | 0       | 0          | Hormonal          | 1        | N/A                      | 0 | 4.0         | 4.0         | 1       |
| <b>Rider et al. 2019</b> <sup>237</sup>                   | Case Series – IV | 2 / 1       | 68 (49-87) | Adrenal Gland                  | 12.5 (1-24) | 2 R (100%)                          | 2 Diffuse (100%)                                     | 2 Soft Tissue (100%)           | 2 (100%) | 2 Mass (100%)<br>1 Pro (50%)<br>1 S (50%)                               | 2 Osteolytic (100%) | 1 Complete (50%)<br>1 Partial (50%) | 1Decompress<br>ion (50%) | 0       | 1 (50%)    | 0                 | 2 (100%) | 1 PR (50%)               | 0 | 2.0 (1-3)   | 2.0 (1-3)   | 1 (50%) |
| <b>Sochat et al. 2019</b> <sup>238</sup>                  | Case Report – V  | 1 / 0       | 60         | Liver                          | 0           | R                                   | Lateral                                              | Bone                           | 0        | D, Mass, Pro                                                            | Oncolytic           | Partial                             | N/A                      | 1       | 1, 37.5 Gy | 0                 | 1        | CR                       | 0 | 18.0        | 18.0        | 1       |

|                                                    |                  |                |              |                                                                                       |                |                                         |                                                                                   |                                                                      |     |                                                                                                               |            |                                                        |     |            |            |                  |         |            |   |                |                |            |
|----------------------------------------------------|------------------|----------------|--------------|---------------------------------------------------------------------------------------|----------------|-----------------------------------------|-----------------------------------------------------------------------------------|----------------------------------------------------------------------|-----|---------------------------------------------------------------------------------------------------------------|------------|--------------------------------------------------------|-----|------------|------------|------------------|---------|------------|---|----------------|----------------|------------|
| <b>Tao et al. 2019</b> <sup>239</sup>              | Case Report – V  | 1 / 1          | 63           | Breast                                                                                | 6.0            | L                                       | Superolateral                                                                     | Soft Tissue                                                          | 1   | D                                                                                                             | N/A        | Complete                                               | N/A | 0          | 1, 52.5 Gy | Hormonal         | 1       | CR         | 0 | 6.0            | 6.0            | 1          |
| <b>Yadav et al. 2019</b> <sup>240</sup>            | Case Report – V  | 1 / 0          | 60           | Bladder                                                                               | 0              | L                                       | Superomedial                                                                      | Muscle                                                               | 0   | DV, OP, Pro, RE                                                                                               | N/A        | Complete                                               | N/A | 0          | 0          | 0                | 1       | N/A        | 0 | 6.0            | 6.0            | 1          |
| <b>Yu et al. 2019</b> <sup>241</sup>               | Case Report – V  | 1 / 1          | 43           | Small bowel                                                                           | 48.0           | L                                       | Superolateral                                                                     | Soft Tissue                                                          | 0   | Pro, VL                                                                                                       | N/A        | Complete                                               | N/A | 0          | 0          | 0                | 1       | N/A        | 0 | 6.0            | 6.0            | 1          |
| <b>Bacorn et al. 2020</b> <sup>242</sup>           | Case Report – V  | 1 / 1          | 51           | Colorectal                                                                            | 8.0            | R                                       | Superior                                                                          | Fat                                                                  | 0   | Pt, S                                                                                                         | N/A        | Biopsy                                                 | N/A | 1          | 0          | 0                | 0       | SD         | 0 | 6.0            | 6.0            | 0          |
| <b>Blohmer et al. 2020</b> <sup>243</sup>          | Case Series – IV | 15 / 15 (100%) | N/A          | 15 Breast (100%)                                                                      | 26.0 (0-153.8) | 7 R (46.7%)<br>5 L (33.3%)<br>3 B (20%) | N/A                                                                               | 5 Bone (33.3%)<br>5 Muscle (33.3%)<br>5 Fat (33.3%)                  | N/A | N/A                                                                                                           | N/A        | 15 Surgery (100%)                                      | N/A | 14 (93.3%) | 9 (60%)    | 0                | N/A     | N/A        | 0 | 2.0 (0.5-91.3) | 2.0 (0.5-91.3) | 2 (13.3%)  |
| <b>El Bakraoui et al. 2020</b> <sup>244</sup>      | Case Report – V  | 1 / 1          | 43           | Breast                                                                                | 3.0            | L                                       | Superolateral                                                                     | Soft Tissue                                                          | 0   | DV, Mass                                                                                                      | Osteolytic | Biopsy                                                 | N/A | 1          | 1, 60 Gy   | 0                | 1       | PR         | 0 | 14.0           | 14.0           | 0          |
| <b>Halliday et al. 2020</b> <sup>245</sup>         | Case Report – V  | 1 / 0          | 79           | Carcinoid                                                                             | 36.0           | B                                       | Diffuse                                                                           | Muscle                                                               | 0   | D, Pro                                                                                                        | N/A        | Biopsy                                                 | N/A | 1          | 1, 30 Gy   | Hormonal         | 1       | PR         | 0 | 12.0           | 12.0           | 1          |
| <b>Hoenck et al. 2020</b> <sup>246</sup>           | Case Report – V  | 1 / 1          | 58           | Carcinoid                                                                             | 0              | B                                       | Diffuse                                                                           | Muscle                                                               | 0   | DV, IM, Pt, RAPD, S                                                                                           | N/A        | Biopsy                                                 | N/A | 0          | 0          | Hormonal         | 1       | N/A        | 0 | 2.0            | 2.0            | 0          |
| <b>Long et al. 2020</b> <sup>247</sup>             | Case Report – V  | 1 / 0          | 84           | Colorectal                                                                            | 0              | R                                       | Superolateral                                                                     | Bone                                                                 | 1   | Pro, Pt, RAPD                                                                                                 | Osteolytic | Partial                                                | N/A | 1          | 1          | 0                | N/A     | N/A        | 0 | 3.0            | 3.0            | 1          |
| <b>Madabhavi et al. 2020</b> <sup>248</sup>        | Case Report – V  | 1 / 0          | 72           | Liver                                                                                 | 0              | L                                       | Superolateral                                                                     | Bone                                                                 | 1   | Mass, OP, Pro                                                                                                 | Osteolytic | FNAB                                                   | N/A | 1          | 0          | 0                | 1       | PR         | 0 | 7.0            | 7.0            | 1          |
| <b>Mahuvakar et al. 2020</b> <sup>249</sup>        | Case Report – V  | 1 / 1          | 72           | Kidney                                                                                | 96.0           | R                                       | Medial                                                                            | Soft Tissue                                                          | 0   | D, IM, Pro                                                                                                    | N/A        | Complete                                               | N/A | 0          | 0          | 0                | 1       | CR         | 0 | 6.0            | 6.0            | 1          |
| <b>Marotta et al. 2020</b> <sup>250</sup>          | Case Report – V  | 1 / 1          | 58           | Breast                                                                                | 240.0          | B                                       | Superomedial                                                                      | Muscle                                                               | 0   | D, Pt                                                                                                         | N/A        | Biopsy                                                 | N/A | 1          | 1, 45 Gy   | 0                | 1       | PR         | 0 | 3.0            | 3.0            | 1          |
| <b>Mian et al. 2020</b> <sup>251</sup>             | Case Report – V  | 1 / 0          | 74           | Mesothelium                                                                           | 18.0           | L                                       | Inferior                                                                          | Muscle                                                               | 0   | Pro, RAPD                                                                                                     | N/A        | Partial                                                | N/A | 1          | 1, 25 Gy   | 0                | 1       | PR         | 0 | 5.0            | 5.0            | 1          |
| <b>Montejano-Milner et al. 2020</b> <sup>252</sup> | Case Series – IV | 10 / 5 (50%)   | 62.5 (43-82) | 4 Breast (40%)<br>2 Bladder (20%)<br>2 Lung (20%)<br>1 Ovary (10%)<br>1 Pharynx (10%) | N/A            | 5 L (50%)<br>4 R (40%)<br>1 B (10%)     | 5 Posterior (50%)<br>3 Diffuse (30%)<br>1 Inferolateral (10%)<br>1 Superior (10%) | 4 Soft Tissue (40%)<br>3 Muscle (30%)<br>2 Fat (20%)<br>1 Bone (10%) | N/A | 5 D (50%)<br>3 DV (30%)<br>3 Mass (30%)<br>3 OP (30%)<br>3 Pro (30%)<br>1 En (10%)<br>1 RE (10%)<br>1 S (10%) | N/A        | 8 Surgery (100%)<br>1 Complete (10%)<br>2 Biopsy (20%) | N/A | 3 (30%)    | 3 (30%)    | 1 Hormonal (10%) | N/A     | N/A        | 0 | 5.5 (1-54)     | 5.5 (1-54)     | 1 (10%)    |
| <b>Narayanan et al. 2020</b> <sup>253</sup>        | Case Report – V  | 1 / 1          | 52           | Melanoma                                                                              | 0              | R                                       | Lateral                                                                           | Soft Tissue                                                          | 0   | IM, Pro                                                                                                       | N/A        | Biopsy                                                 | N/A | 1          | 0          | 0                | 0       | N/A        | 0 | 3.0            | 3.0            | 0          |
| <b>Pastore et al. 2020</b> <sup>254</sup>          | Case Report – V  | 1 / 0          | 72           | Prostate                                                                              | 0              | L                                       | Superomedial                                                                      | Soft Tissue                                                          | 1   | DV, Pro                                                                                                       | Osteolytic | FNAB                                                   | N/A | 0          | 0          | Hormonal         | 1       | N/A        | 0 | 18.0           | 18.0           | 0          |
| <b>Protopapa et al. 2020</b> <sup>255</sup>        | Case Report – V  | 1 / 0          | 53           | Liver                                                                                 | 0              | L                                       | Superomedial                                                                      | Bone                                                                 | 1   | Mass, VL                                                                                                      | Osteolytic | Biopsy                                                 | N/A | 0          | 1          | 0                | 0       | N/A        | 0 | 3.0            | 3.0            | 1          |
| <b>Sindoni et al. 2020</b> <sup>256</sup>          | Case Series – IV | 28 / 28 (100%) | 56.3         | 28 Breast (100%)                                                                      | 60.0           | 18 L (64.3%)<br>10 R (35.7%)            | N/A                                                                               | N/A                                                                  | N/A | 14 Pro (50%)<br>4 D (14.3%)<br>4 Mass (14.3%)<br>2 En (7.1%)<br>2 Pt (7.1%)<br>2 S (7.1%)                     | N/A        | 28 Biopsy (100%)                                       | N/A | 26 (92.8%) | 12 (42.8%) | 0                | N/A     | N/A        | 0 | 26.4           | 26.4           | 18 (64.3%) |
| <b>Tsuruta et al. 2020</b> <sup>257</sup>          | Case Report – V  | 1 / 1          | 60           | Stomach                                                                               | 168.0          | L                                       | Superomedial                                                                      | Soft Tissue                                                          | 0   | D, OP, VL                                                                                                     | N/A        | Biopsy                                                 | N/A | 0          | 0          | 0                | 1       | N/A        | 0 | 12.0           | 12.0           | 1          |
| <b>Wada et al. 2020</b> <sup>258</sup>             | Case Report – V  | 1 / 0          | 79           | Prostate                                                                              | 0              | L                                       | Superomedial                                                                      | Soft Tissue                                                          | 0   | DV, Pt                                                                                                        | N/A        | Biopsy                                                 | N/A | 0          | 0          | Hormonal         | 1       | PR         | 0 | 3.0            | 3.0            | 1          |
| <b>El-Khazen Dupuis et al. 2021</b> <sup>259</sup> | Case Series – IV | 2 / 2          | 75 (74-76)   | 2 Breast (100%)                                                                       | 0              | 1 B (50%)<br>1 L (50%)                  | 1 Diffuse (50%)<br>1 Posterior (50%)                                              | 1 Muscle (50%)<br>1 Soft Tissue (50%) <sup>9</sup>                   | 0   | 2 D (100%)<br>2 En (100%)<br>1 DV, IM, Mass, Pro (50%)                                                        | N/A        | 1 Biopsy (50%)                                         | N/A | 1 (50%)    | 0          | 1 Hormonal (50%) | 1 (50%) | 1 PR (50%) | 0 | 37.5 (3-72)    | 37.5 (3-72)    | 1 (50%)    |

|                                                    |                    |          |    |        |     |   |         |        |   |                |     |         |     |   |          |          |   |    |   |      |      |   |
|----------------------------------------------------|--------------------|----------|----|--------|-----|---|---------|--------|---|----------------|-----|---------|-----|---|----------|----------|---|----|---|------|------|---|
| <b>Mendia et al.</b><br><b>2021</b> <sup>260</sup> | Case Report –<br>V | 1 /<br>1 | 72 | Cervix | 1.0 | L | Lateral | Fat    | 0 | D, OP          | N/A | Biopsy  | N/A | 1 | 1, 30 Gy | 0        | 1 | PD | 0 | 4.0  | 4.0  | 0 |
| <b>Oprean et al.</b><br><b>2021</b> <sup>261</sup> | Case Report –<br>V | 1 /<br>1 | 57 | Breast | 0   | L | Diffuse | Muscle | 0 | D, DV, Pro, Pt | N/A | Partial | N/A | 0 | 1, 25 Gy | Hormonal | 1 | CR | 1 | 46.0 | 53.0 | 0 |
| <b>Razem et al.</b><br><b>2021</b> <sup>262</sup>  | Case Report –<br>V | 1 /<br>1 | 33 | Breast | 1.0 | L | Diffuse | Muscle | 0 | D, IM          | N/A | Biopsy  | N/A | 0 | 0        | Hormonal | 1 | CR | 0 | 12.0 | 12.0 | 1 |

**Abbreviations:** **M**, Male; **F**, Female; **B**, bilateral; **L**, left; **Mid**, midline; **R**, right; **CUP**, carcinoma of unknown primary; **D**, diplopia; **DV**, decreased vision; **En**, enophthalmos; **IM**, impaired eye motility; **OP**, orbital pain; **Pro**, proptosis; **Pt**, ptosis; **RAPD**, relative afferent pupillary defect (cranial nerve III deficit); **RE**, red eye; **S**, swelling; **VL**, vision loss; **FNAB**, fine needle aspiration biopsy; **Complete**, resection 100% tumor; **Partial**, resection <100% tumor; **CK**, cyber-knife; **GK**, gamma-knife; **SRS**, stereotactic radiosurgery; **WBRT**, whole brain radiation therapy; **LITT**, laser interstitial thermal therapy; **CR**, Complete Response, **PR**, Partial Response, **SD**, Stable Disease; **PD**, Progression Disease; **PFS**, Progression-Free Survival; **OS**, Overall Survival; **N/A**, Not Available.

References

1. Arnott EJ, Greaves DP. METASTASES IN THE ORBIT. *Br J Ophthalmol*. 1965;49(1):43-45. doi:10.1136/bjo.49.1.43

2. Chatterjee BM, Deb M. Metastatic Carcinoma of the Orbit. *Am J Ophthalmol*. 1965;59(1):103-105. doi:10.1016/0002-9394(65)95028-2

3. Mortada A. Roentgenography in Orbital Metastases by Exophthalmos. *Am J Ophthalmol*. 1968;65(1):48-53. doi:10.1016/0002-9394(68)91027-1

4. Honrubia FM, Davis WH, Moore MK, Elliott JH. Carcinoid Syndrome with Bilateral Orbital Metastases. *Am J Ophthalmol*. 1971;72(6):1118-1121. doi:10.1016/0002-9394(71)91218-9

5. Ashton N, Morgan G. Discrete carcinomatous metastases in the extraocular muscles. *Br J Ophthalmol*. 1974;58(2):112-117. doi:10.1136/bjo.58.2.112

6. HUH SH, NISCE LZ, SIMPSON LD, CHU FCH. VALUE OF RADIATION THERAPY IN THE TREATMENT OF ORBITAL METASTASIS. *Am J Roentgenol*. 1974;120(3):589-594. doi:10.2214/ajr.120.3.589

7. Saxena RB, Mathur RN, Sonani SZ. Orbital metastasis of mixed parotid tumour. *Indian J Ophthalmol*. 1975;23(2):23-24. <http://www.ncbi.nlm.nih.gov/pubmed/1236448>

8. Usui T, Ishibe T, Nihira H. Orbital Metastasis from Prostatic Carcinoma. *Br J Urol*. 1975;47(4):458-458. doi:10.1111/j.1464-410X.1975.tb04007.x

9. Balestrazzi E. An Unusual Case of Metastatic Malignant Melanoma in the Orbit. *Ophthalmologica*. 1976;172(1):70-74. doi:10.1159/000307587

10. Howard GM, Jakobiec FA, Trokel SL, Iwamoto T, Jones IS. Pulsating metastatic tumor of the orbit. *Am J Ophthalmol*. 1978;85(6):767-771. doi:10.1016/s0002-9394(14)78103-6

11. Stewart WB, Newman NM, Cavender JC, Spencer WH. Fibrous Histiocytoma Metastatic to the Orbit. *Arch Ophthalmol*. 1978;96(5):871-873. doi:10.1001/archopht.1978.03910050473016

12. Bullock JD, Yanes B. Ophthalmic Manifestations of Metastatic Breast Cancer. *Ophthalmology*. 1980;87(10):961-973. doi:10.1016/S0161-6420(80)35124-5

13. Lubin JR, Grove AS, Zakov ZN, Albert DM. Hepatoma Metastatic to the Orbit. *Am J Ophthalmol*. 1980;89(2):268-273. doi:10.1016/0002-9394(80)90123-3

14. Rush JA, Waller RR, Campbell RJ. Orbital Carcinoid Tumor Metastatic from the Colon. *Am J Ophthalmol*. 1980;89(5):636-640. doi:10.1016/0002-9394(80)90279-2

15. SOBOL S, DRUCK NS, WOLF M. PALLIATIVE ORBITAL DECOMPRESSION FOR METASTATIC MELANOMA TO THE ORBIT. *Laryngoscope*. 1980;90(2):329???333. doi:10.1288/00005537-198002000-00021

16. Rush JA, Older JJ, Richman A V. Testicular Seminoma Metastatic to the Orbit. *Am J Ophthalmol*. 1981;91(2):258-260. doi:10.1016/0002-9394(81)90185-9

17. Winkler CF. Orbital Metastasis From Prostatic Carcinoma. *Arch Ophthalmol*. 1981;99(8):1406. doi:10.1001/archopht.1981.03930020280016

18. Wolter JR, Hendrix RC. Osteoblastic Prostate Carcinoma Metastatic to the Orbit. *Am J Ophthalmol*. 1981;91(5):648-651. doi:10.1016/0002-9394(81)90068-4

19. Zubler MA, Rivera R, Lane M. Hepatoma presenting as a retro-orbital metastasis. *Cancer*. 1981;48(8):1883-1885. doi:10.1002/1097-0142(19811015)48:8<1883::AID-CNCR2820480828>3.0.CO;2-J

20. Carriere VM, Karcioglu ZA, Apple DJ, Insler MS. A Case of Prostate Carcinoma with Bilateral Orbital Metastases and the Review of the Literature. *Ophthalmology*. 1982;89(4):402-406. doi:10.1016/S0161-6420(82)34779-X

21. Riddle PJ, Font RL, Zimmerman LE. Carcinoid tumors of the eye and orbit: A clinicopathologic study of 15 cases, with histochemical and electron microscopic observations. *Hum Pathol*. 1982;13(5):459-469. doi:10.1016/S0046-8177(82)80029-4

22. Tertzakian GM, Herr HW, Mehta MB. Orbital metastases from prostatic carcinoma. *Urology*. 1982;19(4):427-429. doi:10.1016/0090-4295(82)90205-9

23. Weitberg AB, Weitzman SA. Metastatic Islet Cell Carcinoma: A Potentially Treatable Cause of “Carcinoma of Unknown Origin.” *CA Cancer J Clin*. 1983;33(3):167-171. doi:10.3322/canjclin.33.3.167

24. Mortada A. Binocular diplopia due to metastasis in orbital muscle from female breast cancer years after radical mastectomy. *Orbit*. 1984;3(1):71-73. doi:10.3109/01676838409028657

25. Reifler DM, Kini SR, Liu D, Littleton RH. Orbital metastasis from prostatic carcinoma. Identification by immunocytology. *Arch Ophthalmol (Chicago, Ill 1960)*. 1984;102(2):292-295. doi:10.1001/archopht.1984.01040030236033

26. DUNAWAY RL. Ptosis as the Presenting Sign of Orbital Involvement from Metastatic Bronchogenic Carcinoma. *Optom Vis Sci*. 1985;62(12):908-912. doi:10.1097/00006324-198512000-00013

27. Bond J, Wesley RE, Reynolds VH, Elliott JH, Glick AD. Orbital Metastasis From Cutaneous Melanoma. *South Med J*. 1986;79(11):1439-1442. doi:10.1097/00007611-198611000-00029

28. Denby P, Harvey L, English MG. Solitary metastasis from an occult renal cell carcinoma presenting as a primary lacrimal gland tumour. *Orbit*. 1986;5(1):21-24. doi:10.3109/01676838609034231

29. Schlaen ND, Naves AE. Orbital and Choroidal Metastases From Carcinoma of the Male Breast. *Arch Ophthalmol*. 1986;104(9):1344-1346. doi:10.1001/archopht.1986.01050210098033

30. Hornblass A, Kass LG, Reich R. Thyroid Carcinoma Metastatic to the Orbit. *Ophthalmology*. 1987;94(8):1004-1007. doi:10.1016/S0161-6420(87)33353-6

31. Kaltreider SA, Destro M, Lemke BN. Leiomyosarcoma of the Orbit. *Ophthalmic Plast Reconstr Surg*. 1987;3(1):35-42. doi:10.1097/00002341-198701000-00008

32. Noci ND, Mininni F, Pomes L. A clinical case of breast adenocarcinoma metastatic to the orbital plate of the frontal bone. *Orbit*. 1987;6(2):149-150. doi:10.3109/01676838709036093

33. Oosterhuis JA, de Keizer RJW, de Wolff-Rouendaal D, Kakebeeke-Kemme HM, de Graaff ML. Ocular and orbital metastasis of cutaneous melanomas. *Int Ophthalmol*. 1987;10(3):175-184. doi:10.1007/BF00139345

34. Otto RA, Templer JW, Renner G, Hurt M. Secondary and metastatic tumors of the orbit. *Otolaryngol Head Neck Surg*. 1987;97(3):328-334. doi:10.1177/019459988709700315

35. Shields CL, Shields JA, Eagle RC, Peyster RG, Conner BE, Green HA. Orbital Metastasis From a Carcinoid Tumor: Computed Tomography, Magnetic Resonance Imaging, and Electron Microscopic Findings. *Arch Ophthalmol*. 1987;105(7):968-971. doi:10.1001/archopht.1987.01060070104038

36. Stefanyszyn MA, DeVita EG, Flanagan JC. Breast Carcinoma Metastatic to the Orbit. *Ophthalmic Plast Reconstr Surg*. 1987;3(1):43-48. doi:10.1097/00002341-198701000-00009

37. Boldt HC, Nerad JA. Orbital Metastases From Prostate Carcinoma. *Arch Ophthalmol*. 1988;106(10):1403-1408. doi:10.1001/archopht.1988.01060140567024

38. Orcutt JC, Char DH. Melanoma Metastatic to the Orbit. *Ophthalmology*. 1988;95(8):1033-1037. doi:10.1016/S0161-6420(88)33061-7

39. Jacobs M, Bengner R. Metastatic breast carcinoma of the orbit. *Aust N Z J Ophthalmol*. 1989;17(4):357-361. doi:10.1111/j.1442-9071.1989.tb00554.x

40. Shields CL, Shields JA, Peggs M. Tumors Metastatic to the Orbit. *Ophthalmic Plast Reconstr Surg*. 1988;4(2):73-80. doi:10.1097/00002341-198804020-00003

41. Malviya VK, Blessed W, Lawrence WD, Deppe G. Retroorbital metastases in ovarian cancer. *Gynecol Oncol*. 1989;35(1):120-123. doi:10.1016/0090-8258(89)90025-5

42. Ruusuvaara P, Setälä K, Tarkkanen A. Orbital metastasis from cutaneous malignant melanoma. *Acta Ophthalmol*. 2009;67(3):325-328. doi:10.1111/j.1755-3768.1989.tb01881.x

43. Spaide RF, Granger E, Hammer BD, Negron FJ, Paglen PG. Rapidly expanding exophthalmos: an unusual presentation of small cell lung cancer. *Br J Ophthalmol*. 1989;73(6):461-462. doi:10.1136/bjo.73.6.461

44. Capone A. Discrete Metastasis of Solid Tumors to Extraocular Muscles. *Arch Ophthalmol*. 1990;108(2):237. doi:10.1001/archopht.1990.01070040089037

45. Friedman J, Karesh J, Rodrigues M, Sun C-CJ. Thyroid Carcinoma Metastatic to the Medial Rectus Muscle. *Ophthalmic Plast Reconstr Surg*. 1990;6(2):122-125. doi:10.1097/00002341-199006000-00008

46. Goldberg RA, Rootman J. Clinical Characteristics of Metastatic Orbital Tumors. *Ophthalmology*. 1990;97(5):620-624. doi:10.1016/S0161-6420(90)32534-4

47. Shetlar DJ, Font RL, Ordóñez N, El-Naggar A, Boniuk M. A Clinicopathologic Study of Three Carcinoid Tumors Metastatic to the Orbit. *Ophthalmology*. 1990;97(2):257-264. doi:10.1016/S0161-6420(90)32617-9

48. Wakisaka S, Tashiro M, Nakano S, Kita T, Kisanuki H, Kinoshita K. Intracranial and orbital metastasis of hepatocellular carcinoma. *Neurosurgery*. Published online May 1990:863. doi:10.1097/00006123-199005000-00021

49. Felip E, Rovirosa MA, Salud A, Capdevila F, Bellmunt J, Giral J. Orbital metastases from transitional-cell cancer of the urinary bladder. *Urol Int*. 1991;46(1):82-84. doi:10.1159/000281784

50. Glazer LC, Harris GJ, Simons KB. Orbital Metastasis as the Presenting Sign of Adenocarcinoma of the Breast. *Ophthalmic Plast Reconstr Surg*. 1991;7(4):252-255. doi:10.1097/00002341-199112000-00003

51. van der Heijden A, Twijnstra A, Lamers WPMA, Hupperets PSGJ, Freling G. An unusual cause of diplopia in a cancer patient. *Eur J Cancer Clin Oncol*. 1991;27(10):1315-1316. doi:10.1016/0277-5379(91)90104-L

52. Zucker JL. Mycosis Fungoides Metastatic to the Orbit. *Arch Ophthalmol*. 1991;109(5):688. doi:10.1001/archopht.1991.01080050102038

53. Brackup AB, Nerad JA, Carter KD. Orbital metastasis from a malignant melanoma arising in a giant congenital melanocytic nevus. *Orbit*. 1992;11(3):123-130. doi:10.3109/01676839209074008

54. Di Leo A, Bajetta E. Adenocarcinoma of Unknown Primary Site with Bone Marrow and Orbital Metastases Suggestive of a Prostatic Origin. *Tumori J*. 1992;78(1):63-64. doi:10.1177/030089169207800116

55. Shetty B, Tyers AG. Metastatic carcinoma in the orbit. A case report. *Indian J Ophthalmol*. 1992;40(1):29-30. <http://www.ncbi.nlm.nih.gov/pubmed/1464453>

56. Tijl J, Koornneef L, Eijpe A, Thomas L, Gonzalez Gonzalez D, Veenhof C. Metastatic tumors to the orbit — management and prognosis. *Graefe’s Arch Clin Exp Ophthalmol*. 1992;230(6):527-530. doi:10.1007/BF00181773

57. Vanderpump MPJ, Tunbridge WMG. Hürthle cell carcinoma presenting with retroorbital metastasis. *J R Soc Med*. 1992;85(8):493-494. <http://www.ncbi.nlm.nih.gov/pubmed/1404203>

58. Bersani TA, Costello JJ, Mango CA, Streeten BW. Benign Approach to a Malignant Orbital Tumor. *Ophthalmic Plast Reconstr Surg*. 1994;10(1):42-44. doi:10.1097/00002341-199403000-00008

59. Ellis M, Drewe R, O’Day J. Desmoplastic malignant melanoma presenting with orbital involvement. *Aust N Z J Ophthalmol*. 1994;22(2):119-123. doi:10.1111/j.1442-9071.1994.tb00778.x

60. Hugkulstone CE, Winder S, Sokal M. Bilateral orbital metastases from transitional cell carcinoma of the bladder. *Eye (Lond)*. 1994;8 ( Pt 5):580-582. doi:10.1038/eye.1994.141
61. Loo KT, Tsui WMS, Ho LC, Tang SK, Tse CH, Chung KH. Hepatocellular carcinoma metastasizing to the brain and orbit: report of three cases. *Pathology*. 1994;26(2):119-122. doi:10.1080/00313029400169321
62. Tranfa F, Cennamo G, Rosa N, de Rosa G, Bonavolonià G. An Unusual Orbital Lesion: Hepatoma Metastatic to the Orbit. *Ophthalmologica*. 1994;208(6):329-332. doi:10.1159/000310532
63. Aburn NS, Whitehead K, Sullivan TJ. Bronchopulmonary atypical carcinoid tumour metastatic to the orbit. *Aust N Z J Ophthalmol*. 1995;23(3):241-244. doi:10.1111/j.1442-9071.1995.tb00166.x
64. Airoidi M, Succo G, Valente G, Cavalot A, Gabriele P, Bumma C. Head and Neck Metastases of Renal Cancer after Nephrectomy: A Report of 2 Cases. *Tumori J*. 1995;81(3):213-214. doi:10.1177/030089169508100313
65. Day TA, Hoasjoe DK, Hebert RL, et al. Head and Neck Squamous Cell Carcinoma Metastatic to the Orbital Apex. *Skull Base*. 1995;5(02):123-129. doi:10.1055/s-2008-1058943
66. FAN JT, BUETTNER H, BARTLEY GB, BOLLING JP. Clinical Features and Treatment of Seven Patients With Carcinoid Tumor Metastatic to the Eye and Orbit. *Am J Ophthalmol*. 1995;119(2):211-218. doi:10.1016/S0002-9394(14)73875-9
67. Rhatigan MC, Ashworth JL, Shah S, Bonshek RE, Leatherbarrow B. Bilateral orbital metastases from breast carcinoma masquerading as thyroid eye disease. *Eye*. 1995;9(5):653-655. doi:10.1038/eye.1995.161
68. Thomas KM, Cumberworth VL, McEwan J. Orbital and skin metastases in a polymorphous low grade adenocarcinoma of the salivary gland. *J Laryngol Otol*. 1995;109(12):1222-1225. doi:10.1017/S0022215100132517
69. Burnstine MA, Frueh BR, Elner VM. Angiosarcoma metastatic to the orbit. *Arch Ophthalmol (Chicago, Ill 1960)*. 1996;114(1):93-96. doi:10.1001/archophth.1996.01100130089017
70. El-Toukhy E, Levine MR, Abdul-Karim FW, Larson DW. Carcinoid Tumors of the Orbit. *Ophthalmic Plast Reconstr Surg*. 1996;12(4):279-283. doi:10.1097/00002341-199612000-00011
71. Char DH, Miller T, Kroll S. Orbital metastases: diagnosis and course. *Br J Ophthalmol*. 1997;81(5):386-390. doi:10.1136/bjo.81.5.386
72. Fezza J, Sinard J. Metastatic Liposarcoma to the Orbit. *Am J Ophthalmol*. 1997;123(2):271-272. doi:10.1016/S0002-9394(14)71055-4
73. Hayashi N, Iwata J, Masaoka N, Ueno H, Ohtsuki Y, Moriki T. Ameloblastoma of the mandible metastasizing to the orbit with malignant transformation. A histopathological and immunohistochemical study. *Virchows Arch*. 1997;430(6):501-507. doi:10.1007/s004280050061
74. Logrono R, Inhorn SL, Dortzbach RK, Kurtycz DF. Leiomyosarcoma metastatic to the orbit: Diagnosis by fine-needle aspiration. *Diagn Cytopathol*. 1997;17(5):369-373. doi:10.1002/(SICI)1097-0339(199711)17:5<369::AID-DC10>3.0.CO;2-L
75. Mezer E, Gdal-On M, Miller B. Orbital metastasis of renal cell carcinoma masquerading as Amaurosis fugax. *Eur J Ophthalmol*. 2008;7(3):301-304. doi:10.1080/01676830802316688
76. Sekundo W, Vogel J. Orbital tumour as a presenting symptom of breast carcinoma: Value of detecting hormone receptors. *Eye*. 1997;11(4):560-563. doi:10.1038/eye.1997.143
77. Zambarakji HJ, Simcock PR, Kinnear PE. Bilateral Orbital Metastases in a Woman with Breast Carcinoma. *J R Soc Med*. 1997;90(12):684-684. doi:10.1177/014107689709001214
78. Font RL. Hepatocellular Carcinoma Metastatic to the Orbit. *Arch Ophthalmol*. 1998;116(7):942. doi:10.1001/archophth.116.7.942
79. Garcia GH, Weinberg DA, Glasgow BJ, Hunt KE, Venegas R, Goldberg RA. Carcinoma of the Male Breast Metastatic to Both Orbits. *Ophthalmic Plast Reconstr Surg*. 1998;14(2):130-133. doi:10.1097/00002341-199803000-00010
80. Schaefer-Hirschkind E, Madonna RJ. Renal cell carcinoma metastatic to the orbit. *Clin Eye Vis Care*. 1998;10(2):99-101. doi:10.1016/S0953-4431(98)00009-5
81. Toller KK, Gigantelli JW, Spalding MJ. Bilateral orbital metastases from breast carcinoma. *Ophthalmology*. 1998;105(10):1897-1901. doi:10.1016/S0161-6420(98)91037-5
82. Collins MJ, Wojno TH, Grossniklaus HE. Metastatic esophageal carcinoma to the orbit. *Am J Ophthalmol*. 1999;127(2):228-229. doi:10.1016/S0002-9394(98)00307-9
83. Scolyer RA, Painter DM, Harper CG, Soon Lee C. Hepatocellular carcinoma metastasizing to the orbit diagnosed by fine needle aspiration cytology. *Pathology*. 1999;31(4):350-353. doi:10.1080/003130299104710
84. Wein FB, Perry JD, Miller NR, Brinker DA, Leopold DA. Pulmonary carcinoid tumor presenting with simultaneous orbital and intracranial metastases: value of transnasal endoscopic orbital biopsy and decompression. *Orbit*. 1999;18(4):267-272. doi:10.1076/orbi.18.4.267.2687
85. Wolstencroft SJ. Orbital Metastasis Due to Interval Lobular Carcinoma of the Breast. *Arch Ophthalmol*. 1999;117(10):1419. doi:10.1001/archophth.117.10.1419
86. Callejo SA, Kronish JW, Decker SJ, Cohen GR, Rosa RH. Malignant granular cell tumor metastatic to the orbit. *Ophthalmology*. 2000;107(3):550-554. doi:10.1016/S0161-6420(99)00135-9
87. Daumerie C, De Potter P, Godfraind C, Rahier J, Jamar F, Squifflet JP. Orbital Metastasis as Primary Manifestation of Thyroid Carcinoma. *Thyroid*. 2000;10(2):189-192. doi:10.1089/thy.2000.10.189
88. Friedrich RE, Donath K. Epithelial-myoepithelial carcinoma of the parotid gland with multiple distant metastases: A case report. *J Oral Maxillofac Surg*. 2000;58(6):ajoms0580690. doi:10.1053/joms.2000.6223
89. Stuntz M, Yamini D, Moss J, Klein S, Khalkhali I. Bilateral Orbital Metastases as the Presenting Finding in a Male Patient with Breast Cancer: A Case Report and Review of the Literature. *Breast J*. 2000;6(3):204-208. doi:10.1046/j.1524-4741.2000.97090.x
90. Bartley GB, Campbell RJ, Salomão DR, Bradley EA, Marsh WR, Bite U. Adrenocortical Carcinoma Metastatic to the Orbit. *Ophthal Plast Reconstr Surg*. 2001;17(3):215-220. doi:10.1097/00002341-200105000-00012
91. Shields JA, Shields CL, Brotman HK, Carvalho C, Perez N, Eagle RC. Cancer Metastatic to the Orbit. *Ophthal Plast Reconstr Surg*. 2001;17(5):346-354. doi:10.1097/00002341-200109000-00009
92. Maheshwari GK, Baboo HA, Gopal U, Wadhwa MK. Carcinoma of the tongue presenting as orbital metastasis. *Turkish J Cancer*. 2002;32(4):172-176.
93. McCulley TJ, Yip C-C, Bullock JD, Warwar RE, Hood DL. Cervical Carcinoma Metastatic to the Orbit. *Ophthalmic Plast Reconstr Surg*. 2002;18(5):385-387. doi:10.1097/00002341-200209000-00013
94. Misra A, Misra S, Chaturvedi A, Srivastava PK. Orbital metastasis from gall bladder carcinoma. *Br J Radiol*. 2002;75(889):72-73. doi:10.1259/bjr.75.889.750072
95. Baltogiannis D, Kalogeropoulos C, Ioachim E, Agnantis N, Psilas K, Giannakopoulos X. Orbital Metastasis from Prostatic Carcinoma. *Urol Int*. 2003;70(3):219-222. doi:10.1159/000068753
96. Barody M, Hartstein ME, Holds JB. Immunotherapy for Melanoma Metastatic to the Orbit. *Ophthalmic Plast Reconstr Surg*. 2003;19(4):270-274. doi:10.1097/01.IOP.0000075015.65210.B4
97. Fynn-Thompson N, McKiernan JM, Fay A. Transitional Cell Carcinoma of the Urinary Bladder Metastatic to the Orbit. *Ophthalmic Plast Reconstr Surg*. 2003;19(2):165-167. doi:10.1097/01.IOP.0000056026.84209.1B
98. Holland D, Maune S, Kovács G, Behrendt S. Metastatic tumors of the orbit: A retrospective study. *Orbit*. 2003;22(1):15-24. doi:10.1076/orbi.22.1.15.14007
99. Lekse JM, Zhang J, Mawn LA. Metastatic gastroesophageal junction adenocarcinoma to the extraocular muscles. *Ophthalmology*. 2003;110(2):318-321. doi:10.1016/S0161-6420(02)01559-2
100. Saleh TA, Hakin KN, Davidson MJ. Metastasis of acinic cell carcinoma of the parotid gland to the contralateral orbit. *Arch Ophthalmol (Chicago, Ill 1960)*. 2003;121(12):1783-1786. doi:10.1001/archophth.121.12.1783
101. TAKEMOTO Y, NISHIDA N, KOJIRO S, JIMI A, KOJIRO M. Metastatic Carcinoid Tumor in the Orbit. *Kurume Med J*. 2003;50(3/4):165-167. doi:10.2739/kurumemedj.50.165
102. Tehrani A-H, Heegaard S, Prause J, Fledelius H, Daugaard S. Liposarcoma Metastatic to the Orbit. *Eur J Ophthalmol*. 2003;13(1):108-112. doi:10.1177/112067210301300121
103. Zografos L, Ducrey N, Beati D, et al. Metastatic melanoma in the eye and orbit. *Ophthalmology*. 2003;110(11):2245-2256. doi:10.1016/j.ophtha.2003.05.004
104. Chua WCT, Martin PA, Kourt G. Clinical Case Notes. Orbital metastasis from transitional cell carcinoma of the bladder. *Clin Exp Ophthalmol*. 2004;32(4):447-449. doi:10.1111/j.1442-9071.2004.00856.x
105. Glazer-Hockstein C, Syed NA, Warhol M, Gausas RE. Malignant Solitary Fibrous Tumor Metastatic to the Orbit. *Ophthalmic Plast Reconstr Surg*. 2004;20(6):471-473. doi:10.1097/01.IOP.0000144786.56696.98
106. Lell M, Schulz-Wendtland R, Hafner A, Magener A, Bautz WA, Tomandl BF. Bilateral orbital tumour as the presentation of mammographically occult breast cancer. *Neuroradiology*. 2004;46(8):682-685. doi:10.1007/s00234-003-1106-x
107. Van Der Zee J, Koper PCM, Jansen RFM, De Winter KAJ, Van Rhoon GC. Re-irradiation and hyperthermia for recurrent breast cancer in the orbital region: a case report. *Int J Hyperth*. 2004;20(1):1-6. doi:10.1080/02656730310001609344
108. Zdinak LA, Nik NA, Hidayat AA, Hargett NA. Renal Medullary Carcinoma Metastatic to the Orbit: A Clinicopathologic Report. *Ophthalmic Plast Reconstr Surg*. 2004;20(4):322-325. doi:10.1097/01.IOP.0000129530.75840.49
109. BOROTA OC, KLOSTER R, LINDAL S. Carcinoid tumour metastatic to the orbit with infiltration to the extraocular orbital muscle. Case report. *APMIS*. 2005;113(2):135-139. doi:10.1111/j.1600-0463.2005.apm1130207.x
110. Challagundla S, Gokden M, Viswamitra S, Kohli M. Orbital Metastasis from Prostate Cancer: An Atypical Case of Neuroendocrine Dedifferentiation During Progression from Hormone-Sensitive to Refractory Stage. *Clin Prostate Cancer*. 2005;4(2):134-137. doi:10.3816/CGC.2005.n.023
111. Fabi A, Salesi N, Vidiri A, Mirri A, Ferraresi V, Cognetti F. Retroperitoneal liposarcoma with metastasis to both orbits: an unusual metastatic site. *Anticancer Res*. 2005;25(6C):4769-4771. <http://www.ncbi.nlm.nih.gov/pubmed/16334175>
112. Gupta R, Honavar SG, Vemuganti GK. Orbital Metastasis from Hepatocellular Carcinoma. *Surv Ophthalmol*. 2005;50(5):485-489. doi:10.1016/j.survophthal.2005.06.014
113. Hart RH, Luthert PJ, Rose GE. Renal Cell Carcinoma Metastasis Masquerading as Recurrent Orbital Haematoma. *Orbit*. 2005;24(4):281-284. doi:10.1080/01676830500263794
114. Konuk O, Pehlivanli Z, Yirmibesoglu E, Erkal HS, Ereul S, Unal M. Compressive Optic Neuropathy Due to Orbital Metastasis of a Sacral Chordoma: Case Report. *Ophthalmic Plast Reconstr Surg*. 2005;21(3):245-247. doi:10.1097/01.IOP.0000159175.89287.1F
115. Mohadjer Y, Holds JB. Orbital Metastasis as the Initial Finding of Breast Carcinoma: A Ten-Year Survival. *Ophthalmic Plast Reconstr Surg*. 2005;21(1):65-66. doi:10.1097/01.IOP.0000150350.35376.11
116. Puglisi F, Capuano P, Gentile A, et al. Retrobulbar Metastasis from Gallbladder Carcinoma after Laparoscopic Cholecystectomy. A Case Report. *Tumori J*. 2005;91(5):428-431. doi:10.1177/030089160509100510
117. Aralikatti DA, Nylander AGE. Orbital Metastasis from Squamous Cell Carcinoma of the Esophagus. *Eur J Ophthalmol*. 2006;16(3):458-460. doi:10.1177/112067210601600316
118. Lee KYC, Jap A, Cheah E, Looi A. Orbital metastatic tumour as initial manifestation of asymptomatic gastric adenocarcinoma. *Ann Acad Med Singapore*. 2006;35(10):719-722. <http://www.ncbi.nlm.nih.gov/pubmed/17102896>



119. Mehta JS, Abou-Rayyah Y, Rose GE. Orbital Carcinoid Metastases. *Ophthalmology*. 2006;113(3):466-472. doi:10.1016/j.opthta.2005.10.051
120. Oida Y, Ohtani Y, Dowaki S, et al. Hepatocellular carcinoma metastatic to the orbit: a case report. *Tokai J Exp Clin Med*. 2006;31(1):7-10. <http://www.ncbi.nlm.nih.gov/pubmed/21302214>
121. Schick U, Lermen O, Hassler W. Management of Orbital Metastases. *Zentralbl Neurochir*. 2006;67(01):1-7. doi:10.1055/s-2005-836922
122. Sharma K, Verma A, Rath B, Kumar R, Kanaujia V. Metastatic Tumor of Orbit Presenting as Pulsatile Proptosis. *Ann Ophthalmol*. 2006;38(1):69-72. doi:10.1385/AO:38:1:69
123. Singh RP, Tullis S, Hatton M, Rubin PAD. Orbital Metastasis From Ovarian Carcinoma in a Patient With BRCA-2 Mutation. *Ophthalmic Plast Reconstr Surg*. 2006;22(4):298-299. doi:10.1097/01.iop.0000222355.09670.d7
124. Solari HP, Ventura MP, Cheema DP, Odashiro AN, Burnier MN. Orbital metastasis from breast carcinoma presenting as neurotrophic keratitis. *Can J Ophthalmol*. 2006;41(1):93-96. doi:10.1016/S0008-4182(06)80075-X
125. Tumuluri K, Sharkawi E, Bindra M, Olver JM. Esophageal Adenocarcinoma Metastatic to the Orbit. *Ophthalmic Plast Reconstr Surg*. 2006;22(2):151-152. doi:10.1097/01.iop.0000200920.30405.c1
126. Yunker JJ, Vicinanzo MG, Braswell RA, Read RW, Goldin GF, Long JA. Unusual Presentation of Gastric Adenocarcinoma Metastatic to the Orbit. *Ophthalmic Plast Reconstr Surg*. 2006;22(6):490-491. doi:10.1097/01.iop.0000245484.65470.51
127. Char DH, Moretto JC, Barakos JA. Cystic Orbital Metastasis from Endometrial Carcinoma. *Orbit*. 2007;26(1):75-77. doi:10.1080/01676830600675400
128. Gerencer RZ, Patel U, Hunter C, Heffernan JT. The Role of Endoscopic Sinus Surgery in the Diagnosis and Treatment of Metastatic Orbital Carcinoid Tumors. *Ear, Nose Throat J*. 2007;86(3):157-161. doi:10.1177/014556130708600312
129. Isshiki S, Cho S, Matsuno D, Sato N, Furuya Y. A case of orbital metastasis from prostatic carcinoma as an initial symptom. *Hinyokika Kyo*. 2007;53(3):193-195. <http://www.ncbi.nlm.nih.gov/pubmed/17447492>
130. Lin H-C, Chang C-H, Li W-M, et al. Orbital Metastasis from Urothelial Carcinoma of the Urinary Bladder. *Kaohsiung J Med Sci*. 2007;23(2):84-88. doi:10.1016/S1607-551X(09)70380-8
131. Mani N, Lowe D, Pope L, El-Daly H, Pfleiderer A. An unusual case of laryngeal spindle cell carcinoma metastasising to the orbit and heart. *J Laryngol Otol*. 2007;121(09):e19. doi:10.1017/S0022215107009498
132. Su GW, Hong SH. Leiomyosarcoma of the Uterus With Sphenoid Bone and Orbital Metastases. *Ophthalmic Plast Reconstr Surg*. 2007;23(5):428-430. doi:10.1097/IOP.0b013e3181469ba4
133. Talwar V, Vaid AK, Doval DC, Bhatia K, Jena A, Anand AK. Isolated intraorbital metastasis in breast carcinoma. *J Assoc Physicians India*. 2007;55(JUNE):451-452. <http://www.ncbi.nlm.nih.gov/pubmed/17879503>
134. Torres JJ, Medel R, Alonso T, et al. Orbital Metastases From Male Breast Cancer in Two Cases. *Ophthalmic Plast Reconstr Surg*. 2007;23(2):154-156. doi:10.1097/IOP.0b013e31803316cb
135. Uluocak N, Suha Parlaktas B, Ersay Deniz F, Erdemir F, Dogan Koseoglu R, Gedar MO. Orbital Metastasis of Prostate Cancer: A Case Report. *Kaohsiung J Med Sci*. 2007;23(4):199-202. doi:10.1016/S1607-551X(09)70398-5
136. Alsuhaibani AH, Carter KD, Nerad JA, Lee AG. Prostate Carcinoma Metastasis to Extraocular Muscles. *Ophthalmic Plast Reconstr Surg*. 2008;24(3):233-235. doi:10.1097/IOP.0b013e3181706d08
137. Hatton MP, Green L, Boulos PR, Rubin PAD. Rhabdomyosarcoma Metastases to All Extraocular Muscles. *Ophthalmic Plast Reconstr Surg*. 2008;24(4):336-338. doi:10.1097/IOP.0b013e31817894c3
138. Henning M, Hu Q, Siegelmann-Danieli N. Orbital metastasis as the presenting symptom of extensive stage small cell lung cancer. *Eur J Intern Med*. 2008;19(1):65-66. doi:10.1016/j.ejim.2007.03.011
139. Hirunwiwatkul P, Tirakunwichcha S, Meesuaypong P, Shuangshoti S. Orbital Metastasis of Hepatocellular Carcinoma. *J Neuro-Ophthalmology*. 2008;28(1):47-50. doi:10.1097/WNO.0b013e31816754e7
140. Kiratli H, Yilmaz PT, Yildiz ZI. Metastatic Atypical Carcinoid Tumor of the Inferior Rectus Muscle. *Ophthalmic Plast Reconstr Surg*. 2008;24(6):482-484. doi:10.1097/IOP.0b013e31818b6d02
141. Kuo S-C, Hsiao S-C, Chiou S-C, Chen F-F, Huang K-C. Metastatic carcinoma of the breast: A case with the unusual presentation of unilateral periorbital edema. *Jpn J Ophthalmol*. 2008;52(4):305-307. doi:10.1007/s10384-008-0562-6
142. Milman T, Pliner L, Langer PD. Breast Carcinoma Metastatic to the Orbit: An Unusually Late Presentation. *Ophthalmic Plast Reconstr Surg*. 2008;24(6):480-482. doi:10.1097/IOP.0b013e31818b6adc
143. Mudiyansele SY, Prabhakaran VC, Davis GJ, Selva D. Metastatic Renal Cell Carcinoma Presenting as a Circumscribed Orbital Mass. *Eur J Ophthalmol*. 2008;18(3):483-485. doi:10.1177/112067210801800332
144. Peng K-L, Kao S-C, Yang C-F, Kau H-C, Tsai C-C, Hsu W-M. Metastatic prostatic adenocarcinoma to the orbit diagnosed by prostate-specific antigen staining. *Eye (Lond)*. 2008;22(2):320-322. doi:10.1038/sj.eye.6703065
145. Pitts J, Chang C-H, Mavrikakis I, Shaikh A, Rootman J. Hepatocellular carcinoma presenting as orbital bone metastasis. *Ophthal Plast Reconstr Surg*. 2008;24(6):477-479. doi:10.1097/IOP.0b013e31818c9558
146. Polito E, Pichierri P, Occhini R, Loffredo A, Moramarco A, Balestrazzi A. Orbital Metastasis Associated with Primary Breast Carcinoma in a Man Detected during Peribulbar Anesthesia for Cataract Surgery. *Eur J Ophthalmol*. 2008;18(6):1031-1033. doi:10.1177/112067210801800633
147. Preechawai P, Amrith S, Yip CC, Goh KY. Orbital Metastasis of Renal Cell Carcinoma Masquerading as Cysticercosis. *Orbit*. 2008;27(5):370-373. doi:10.1080/01676830802316688
148. Rocha Filho FD, Lima GG, Ferreira FV de A, Lima MG, Hissa MN. Orbital metastasis as primary clinical manifestation of thyroid carcinoma: case report and literature review. *Arq Bras Endocrinol Metabol*. 2008;52(9):1497-1500. doi:10.1590/S0004-27302008000900014
149. Seiff BD, Seiff SR. Orbital Metastasis From Medullary Thyroid Carcinoma. *Ophthalmic Plast Reconstr Surg*. 2008;24(6):484-485. doi:10.1097/IOP.0b013e31818b751d
150. Souayah N, Krivitskaya N, Lee H-J. Lateral Rectus Muscle Metastasis As the Initial Manifestation of Gastric Cancer. *J Neuro-Ophthalmology*. 2008;28(3):240-241. doi:10.1097/WNO.0b013e318177253a
151. Surace D, Pisciolli I, Morelli L, Valduga F, Licci S. Orbital metastasis as the first sign of “Dormant” breast cancer dissemination 25 years after mastectomy. *Jpn J Ophthalmol*. 2008;52(5):423-425. doi:10.1007/s10384-008-0555-5
152. Gosslee JM, Misra RP, Langford MP, Vekovius B, Byrd WA, Flynn SB. Orbital metastasis of keratinizing squamous cell cervical carcinoma with giant cells. A case report. *Int Ophthalmol*. 2009;29(1):39-44. doi:10.1007/s10792-007-9162-6
153. Nirmala S, Janaki M, Malavika K, Rishi K. Invasive thymoma with intraorbital metastases. *J Cancer Res Ther*. 2009;5(1):41. doi:10.4103/0973-1482.48768
154. Slagle WS, Eckermann DR, Musick AN, Slagle AM. Adenocarcinoma metastasis causing discrete extraocular muscle enlargement. *Optom - J Am Optom Assoc*. 2009;80(7):367-374. doi:10.1016/j.optm.2008.12.010
155. Valenzuela AA, Archibald CW, Fleming B, et al. Orbital Metastasis: Clinical Features, Management and Outcome. *Orbit*. 2009;28(2-3):153-159. doi:10.1080/01676830902897470
156. Barahimi B, Patel A, Bilyk JR. Orbital Metastasis Mimicking Subperiosteal Abscess. *Orbit*. 2010;29(3):166-168. doi:10.3109/01676830903537120
157. Foo FY, Lee M, Looi A. Asymptomatic Pancreatic Adenocarcinoma Presenting as an Orbital Metastatic Tumor. *Orbit*. 2010;29(5):262-265. doi:10.3109/01676830.2010.485719
158. Francione E, Murelli F, Paroldi A, Margarino C, Friedman D. Orbital swelling as a first symptom in breast carcinoma diagnosis: a case report. *J Med Case Rep*. 2010;4(1):211. doi:10.1186/1752-1947-4-211
159. Hassane S, Fouad E, Said I, et al. Orbital Metastatic Angiosarcoma. *Korean J Ophthalmol*. 2010;24(6):364. doi:10.3341/kjo.2010.24.6.364
160. Matsuo T, Ichimura K, Tanaka T, Takenaka T, Nakayama T. Neuroendocrine Tumor (Carcinoid) Metastatic to Orbital Extraocular Muscle: Case Report and Literature Review. *Strabismus*. 2010;18(4):123-128. doi:10.3109/09273972.2010.525779
161. Ng E, Ilsen PF. Orbital Metastases. *Optom - J Am Optom Assoc*. 2010;81(12):647-657. doi:10.1016/j.optm.2010.07.026
162. Patel V, Castell FA, Akinwunmi J, Francis I, Chandrasekharan L, Malhotra R. Prostatic Adenocarcinoma Presenting with Metastatic Frontal Bone Involvement and Orbital Invasion. *Orbit*. 2010;29(4):213-215. doi:10.3109/01676831003664301
163. Eckardt AM, Rana M, Essig H, Gellrich N-C. Orbital metastases as first sign of metastatic spread in breast cancer: Case report and review of the literature. *Head Neck Oncol*. 2011;3(1):37. doi:10.1186/1758-3284-3-37
164. Galm T, Kulkarni A, Ahmad I. Laryngeal carcinoma metastasis to the orbit: case report. *J Laryngol Otol*. 2011;125(5):533-535. doi:10.1017/S0022215110002860
165. Guerriero S, Infante G, Giancipoli E, et al. Hepatocellular Carcinoma Metastasis to the Orbit in a Coinfected HIV+ HBV+ Patient Previously Treated with Orthotopic Liver Transplantation: A Case Report. *Case Rep Ophthalmol Med*. 2011;2011:1-4. doi:10.1155/2011/549270
166. Gupta S, Bhatt VR, Varma S. Unilateral orbital pain and eyelid swelling in a 46-year-old woman: orbital metastasis of occult invasive lobular carcinoma of breast masquerading orbital pseudotumour. *Case Reports*. 2011;2011(mar10 1):bcr1220103580-bcr1220103580. doi:10.1136/bcr.12.2010.3580
167. Janicijevic-Petrovic M, Sarenac T, Sreckovic S, Vulovic D, Janicijevic K. Orbital metastases from breast cancer: a case report. *Bosn J Basic Med Sci*. 2011;11(4):253. doi:10.17305/bjbms.2011.2561
168. Konoglou M, Zarogoulidis P, Porpodis K, et al. Exophthalmos as a First Manifestation of Small Cell Lung Cancer: A Long-Term Follow-Up. *Case Rep Ophthalmol*. 2011;2(3):360-366. doi:10.1159/000334784
169. Li L-F, Tse Y-H, Ho S-L, Yan K-W, Lui W-M. Duodenal GIST metastasized to skull and orbit managed by surgery – A case report. *Asian J Surg*. 2011;34(4):181-184. doi:10.1016/j.asjsur.2011.11.001
170. Murthy R, Hegde S, Gupta A, Honavar S. Bilateral multiple extraocular muscle metastasis from breast carcinoma. *Indian J Ophthalmol*. 2011;59(5):381. doi:10.4103/0301-4738.83616
171. Mustapha SK, Madachi DA. Orbital metastasis of hepatocellular carcinoma: a case report. *West Afr J Med*. 2000;30(4):305-307. doi:10.7887/jcns.9.707
172. Rosado P, de Vicente JC, Vivanco B, de Villalaín L, Santamarta T. Clinical and Immunohistochemical Analysis of Orbital Metastasis From Prostate Carcinoma. *J Craniofac Surg*. 2011;22(6):2141-2143. doi:10.1097/SCS.0b013e3182323d29
173. Zarogoulidis P, Terzi E, Kouliatsis G, et al. Orbital Metastases as the First Manifestation of Lung Adenocarcinoma. *Case Rep Ophthalmol*. 2011;2(1):34-38. doi:10.1159/000323945
174. Charles NC, Ng DD, Zoumalan CI. Signet Cell Adenocarcinoma of the Rectum Metastatic to the Orbit. *Ophthalmic Plast Reconstr Surg*. 2012;28(1):e1-e2. doi:10.1097/IOP.0b013e31820d18c0
175. Chen J, Wei R, Ma X. Orbital metastasis of retroperitoneal leiomyosarcoma. *Med Oncol*. 2012;29(1):392-395. doi:10.1007/s12032-010-9809-4
176. Dmuchowska DA, Krasnicki P, Obuchowska I, Kochanowicz J, Syta-Krzyżanowska A, Mariak Z. Ophthalmic manifestation of skull base metastasis from breast cancer. *Med Sci Monit*. 2012;18(11):CS105-CS108. doi:10.12659/MSM.883532



177. Jiang H, Wang Z, Xian J, Ai L. Bilateral Multiple Extraocular Muscle Metastasis from Hepatocellular Carcinoma. *Acta Radiol Short Reports*. 2012;1(1):1-3. doi:10.1258/arsr.2011.110002
178. Jung JW, Yoon SC, Han DH, Chi M. Metastatic Renal Cell Carcinoma to the Orbit and the Ethmoid Sinus. *J Craniofac Surg*. 2012;23(2):e136-e138. doi:10.1097/SCS.0b013e31824cdb31
179. Kim HJ, Wojno TH, Grossniklaus H. Atypical Bilateral Orbital Metastases of Lobular Breast Carcinoma. *Ophthalmic Plast Reconstr Surg*. 2012;28(6):e142-e143. doi:10.1097/IOP.0b013e318249d5c0
180. Pecen P, Pecen P, Ramey, Richard, Bhatti. Metastatic pancreatic carcinoma to the orbital apex presenting as a superior divisional third cranial nerve palsy. *Clin Ophthalmol*. 2012;6(1):1941. doi:10.2147/OPTH.S30208
181. SooHoo JR, Gonzalez MO, Siomos VJ, Durairaj VD. Urothelial Carcinoma With Orbital Metastasis. *Urology*. 2012;80(4):e45-e46. doi:10.1016/j.urology.2012.06.002
182. Tomizawa Y, Ocque R, Ohori NP. Orbital Metastasis as the Initial Presentation of Invasive Lobular Carcinoma of Breast. *Intern Med*. 2012;51(12):1635-1638. doi:10.2169/internalmedicine.51.7641
183. Wladis EJ, Farber MG, Nepo AG. Metastatic Synovial Sarcoma to the Orbit. *Ophthalmic Plast Reconstr Surg*. 2012;28(6):e131-e132. doi:10.1097/IOP.0b013e3182467e11
184. Woo D, Leong J, Waring D, Sharma A, Martin P. Orbital Gastrointestinal Stromal Tumor Metastasis. *Orbit*. 2012;31(2):129-131. doi:10.3109/01676830.2011.638100
185. Dobson R, Vinjamuri S, Hsuan J, et al. Treatment of Orbital Metastases From a Primary Midgut Neuroendocrine Tumor With Peptide-Receptor Radiolabeled Therapy Using 177 Lutetium-DOTATATE. *J Clin Oncol*. 2013;31(17):e272-e275. doi:10.1200/JCO.2012.45.8612
186. Fini G, Grippaudo FR, Fenicia V, et al. Orbital Metastases in a Female Patient with Breast Cancer. *Eur J Inflamm*. 2013;11(2):547-552. doi:10.1177/1721727X1301100226
187. FUJIMOTO K, KURODA J, MAKINO K, HASEGAWA Y, KURATSU J. Skull Metastasis From Intrahepatic Cholangiocarcinoma: Report of 3 Cases and Review of the Literature. *Neurol Med Chir (Tokyo)*. 2013;53(10):717-721. doi:10.2176/nmc.cr2012-0237
188. Patel MM, Jakobiec FA, Zakka FR, et al. Intraorbital Metastasis From Solitary Fibrous Tumor. *Ophthalmic Plast Reconstr Surg*. 2013;29(3):e76-e79. doi:10.1097/IOP.0b013e318272f311
189. Patel MM, Lefebvre DR, Lee NG, Brachtel E, Rizzo J, Freitag SK. Gaze-Evoked Amaurosis From Orbital Breast Carcinoma Metastasis. *Ophthalmic Plast Reconstr Surg*. 2013;29(4):e98-e101. doi:10.1097/IOP.0b013e31827defc7
190. Coloma-González I, Ceriotto A, Amezquita-García E, Flores-Preciado J, Salcedo-Casillas G. Orbital pulsatile metastasis as initial presenting sign of metastatic clear cell renal carcinoma. *Arch la Soc Española Oftalmol (English Ed)*. 2014;89(12):500-503. doi:10.1016/j.oftale.2014.11.008
191. Eldesouky MA, Elbakary MA, Shalaby OE, Shareef MM. Orbital Metastasis From Hepatocellular Carcinoma. *Ophthalmic Plast Reconstr Surg*. 2014;30(4):e78-e82. doi:10.1097/IOP.0b013e31829f3a57
192. Greene DP, Shield DR, Shields CL, et al. Cutaneous Melanoma Metastatic to the Orbit. *Ophthalmic Plast Reconstr Surg*. 2014;30(3):233-237. doi:10.1097/IOP.0000000000000075
193. Kapur. Extraconal Orbital Soft Tissue Metastasis Secondary to Prostate Cancer: An Unusual Presentation. *World J Oncol*. 2014;5(3):139-143. doi:10.14740/wjon807w
194. Ludmir EB, McCall SJ, Czito BG, Palta M. Radiosensitive orbital metastasis as presentation of occult colonic adenocarcinoma. *Case Reports*. 2014;2014(sep19 2):bcr2014206407-bcr2014206407. doi:10.1136/bcr-2014-206407
195. Saffra N, Rakhmimov A, Wrzolek MA, Solomon WB, Cooper J, Borgen P. Orbital Metastasis as the Initial Presentation in Bilateral Lobular Invasive Carcinoma of the Breast. *Ophthalmic Plast Reconstr Surg*. 2014;30(2):e30-e32. doi:10.1097/IOP.0b013e3182916537
196. Gupta D, Chappell M, Tailor TD, et al. Orbital Metastasis of Undifferentiated/Anaplastic Thyroid Carcinoma. *Ophthalmic Plast Reconstr Surg*. 2015;31(5):e120-e123. doi:10.1097/IOP.0000000000000145
197. Magliozzi P, Strianese D, Bonavolontà P, et al. Orbital metastases in Italy. *Int J Ophthalmol*. 2015;8(5):1018-1023. doi:10.3980/j.issn.2222-3959.2015.05.30
198. Magrath GN, Proctor CM, Reardon WA, Patel KG, Lentsch EJ, Eiseman AS. Esophageal Adenocarcinoma and Urothelial Carcinoma Orbital Metastases Masquerading as Infection. *Orbit*. 2015;34(1):51-55. doi:10.3109/01676830.2014.963879
199. Pagsisihan DA, Aguilar AHI, Maningat MPDD. Orbital metastasis as initial manifestation of a widespread papillary thyroid microcarcinoma. *Case Reports*. 2015;2015(mar27 1):bcr2014208870-bcr2014208870. doi:10.1136/bcr-2014-208870
200. Pearlman M, Kwong WT. A long and distant journey: a case of rectal cancer with metastasis to the orbit. *Ann Gastroenterol*. 2015;28(1):151-152. <http://www.ncbi.nlm.nih.gov/pubmed/25608827>
201. Rajabi MT, Saeedi-Anari G, Ramezani F, Tabatabaie S-Z, Rajabi MB, Asadi Amoli F. Orbital metastatic osteosarcoma. *Arch Iran Med*. 2015;18(2):123-126. doi:015182/AIM.0012
202. Arthur A. Orbital Metastasis of Cervical Carcinoma – Case Report and Review of Literature. *J Clin DIAGNOSTIC Res*. 2016;10(1):ND01-ND02. doi:10.7860/JCDR/2016/14400.7085
203. Foster CR, Cohen AJ. Signet ring adenocarcinoma of the colon presenting as an orbital metastasis. *Eur J Plast Surg*. 2016;39(6):459-462. doi:10.1007/s00238-016-1222-6
204. MacLean KD, Cole SC, Ford JR, Owen L, Mamalis N, Patel BCK. Thymic Origin Neuroendocrine Carcinoma Metastasizing to the Orbit in an Otherwise Asymptomatic Patient. *Ophthalmic Plast Reconstr Surg*. 2016;32(1):e21-e23. doi:10.1097/IOP.0000000000000375
205. Pokharel S, Kabbach G, Richter SJ, Chiu L. Metastatic Esophageal Cancer Presenting as an Orbital Mass. *ACG Case Reports J*. 2016;3(1):e154. doi:10.14309/crj.2016.127
206. Tabai M, Hazboun IM, Sakuma ETI, Sampaio MH, Sakano E. Orbital Metastasis of Breast Cancer Mimicking Invasive Fungal Rhinosinusitis. *Case Rep Otolaryngol*. 2016;2016:1-4. doi:10.1155/2016/2913241
207. Tun K, Bulut T. Triple orbital metastases from prostate cancer. *Neurol Neurochir Pol*. 2016;50(5):392-394. doi:10.1016/j.pjnns.2016.06.007
208. AufderHeide AC, Bernard BJ, Mollman RA, et al. Metastatic prostate carcinoma to the orbit as the first presentation of disease. *Orbit*. 2017;36(4):234-236. doi:10.1080/01676830.2017.1310257
209. Geske MJ, Bloomer MM, Kersten RC, Vagefi MR. Diagnostic Approaches to Metastatic Hepatocellular Carcinoma of the Orbit. *Ophthalmic Plast Reconstr Surg*. 2017;33(3S):S129-S131. doi:10.1097/IOP.0000000000000641
210. Huang Y-Y, Chang A, Chou Y-Y, Hsu W-C. Metastatic neuroendocrine tumor with initial presentation of orbital apex syndrome. *Interdiscip Neurosurg*. 2017;7:9-11. doi:10.1016/j.inat.2016.10.009
211. Mărginean A, Gheorghe C, Margan MM, et al. Intraorbital tumor as the first and sole manifestation of breast cancer. *Gineco.eu*. 2017;13(3):109-110. doi:10.18643/gieu.2017.109
212. Nabeel M, Farooqi R, Mohebtash M, et al. Rectal Cancer in the Eye: A Case Report of Orbital Metastasis. *Cureus*. 2017;9(8). doi:10.7759/cureus.1589
213. Nash S, Bartels H, Pemberton J. Metastatic cervical adenocarcinoma to the orbital subperiosteal space. *Can J Ophthalmol*. 2017;52(2):e60-e62. doi:10.1016/j.jcjo.2016.10.008
214. Rakul Nambiar K, Ajith PS, Arjunan A. Unilateral proptosis as the initial manifestation of malignancy. *J Egypt Natl Canc Inst*. 2017;29(3):159-161. doi:10.1016/j.jnci.2017.05.004
215. Rasool N. Orbital leiomyosarcoma metastasis presenting prior to diagnosis of the primary tumor. *Digit J Ophthalmol*. 2017;23(4):22. doi:10.5693/djo.02.2017.02.004
216. Wang Y, Mettu P, Maltry A, Harrison A, Mokhtarzadeh A. Metastatic Breast Carcinoma to the Superior Oblique in a Male. *Ophthalmol Ther*. 2017;6(2):355-359. doi:10.1007/s40123-017-0093-7
217. Coutinho I, Marques M, Almeida R, Custódio S, Simões Silva T, Águas F. Extraocular Muscles Involvement as the Initial Presentation in Metastatic Breast Cancer. *J Breast Cancer*. 2018;21(3):339. doi:10.4048/jbc.2018.21.e46
218. Das S, Pineda G, Goff L, Sobel R, Berlin J, Fisher G. The eye of the beholder: orbital metastases from midgut neuroendocrine tumors, a two institution experience. *Cancer Imaging*. 2018;18(1):47. doi:10.1186/s40644-018-0181-5
219. Dutton JJ, Proia AD. Seminoma Metastatic to the Orbit. *Ophthalmic Plast Reconstr Surg*. 2018;34(4):309-312. doi:10.1097/IOP.0000000000001031
220. Gulmez Sevim D, Unlu M, Kontas O, Selcuklu A. Unilateral Proptosis as the Presenting Feature of Papillary Thyroid Carcinoma. *Erciyes Tip Dergisi/Erciyes Med J*. 2018;40(1):50-53. doi:10.5152/etd.2018.17111
221. Nifosi G, Zuccarello M. Unilateral localized extraocular muscle metastasis by lobular breast carcinoma. *BMJ Case Rep*. 2018;2018:bcr-2018-224726. doi:10.1136/bcr-2018-224726
222. Pinto Proença R, Fernandes J, Burnier MN, Proença R. Orbital metastasis from an occult breast carcinoma (T0, N1, M1). *BMJ Case Rep*. 2018;2018(April):bcr-2017-223542. doi:10.1136/bcr-2017-223542
223. Ramsey JK, Chen JL, Schoenfield L, Cho RI. Undifferentiated Pleomorphic Sarcoma Metastatic to the Orbit. *Ophthalmic Plast Reconstr Surg*. 2018;34(6):e193-e195. doi:10.1097/IOP.0000000000001240
224. Roelofs KA, Medlicott S, Henning J-W, Weis E. Gastrointestinal Stromal Tumor Metastasis to the Orbit. *Ophthalmic Plast Reconstr Surg*. 2018;34(4):e131-e133. doi:10.1097/IOP.0000000000001144
225. Rong AJ, Choi CJ, Ghassibi MP, Dubovy SR, Johnson TE. Orbital metastatic small cell carcinoma of the pancreas with optic nerve compression. *Can J Ophthalmol*. 2018;53(1):e22-e24. doi:10.1016/j.jcjo.2017.06.017
226. Shaikh R, Tariq K, Sharma S, Tang S-C. Metastatic Breast Cancer Presenting As Orbital Mass: A Case Report With Literature Review. *J Glob Oncol*. 2018;2018(4):1-4. doi:10.1200/JGO.2017.009282
227. Chumdermpadetsuk R, Tooley AA, Godfrey KJ, Krawitz B, Feldstein N, Kazim M. Renal Medullary Carcinoma With Metastasis to the Temporal Fossa and Orbit. *Ophthalmic Plast Reconstr Surg*. 2019;35(6):e149-e151. doi:10.1097/IOP.0000000000001478
228. Crisostomo S, Cardigos J, Fernandes DH, et al. Bilateral metastases to the extraocular muscles from small cell lung carcinoma. *Arq Bras Oftalmol*. 2019;82(5):422-424. doi:10.5935/0004-2749.20190081
229. Cruzado-Sánchez D, Sánchez-Ortiz J, Peralta CI, Tellez WA, Maquera-Torres G, Serpa-Frías S. Orbital metastasis diagnosed by ultrasound-guided fine-needle aspiration biopsy: case report of unknown primary site. *Arch la Soc Española Oftalmol (English Ed)*. 2019;94(11):566-570. doi:10.1016/j.oftale.2019.07.004
230. Espinosa-Barberi G, Alba Linero C, Galván González FJ, Álvarez González E, Rey López A, Medina Rivero F. Study of aggressive carcinomas through orbital metastasis. *Arch la Soc Española Oftalmol (English Ed)*. 2019;94(5):252-256. doi:10.1016/j.oftale.2018.10.013
231. Framarino-dei-Malatesta M, Chiarito A, Bianciardi F, et al. Metastases to extraocular muscles from breast cancer: case report and up-to-date review of the literature. *BMC Cancer*. 2019;19(1):36. doi:10.1186/s12885-018-5253-1
232. Hernández Pardines F, Serra Verdú MC, Bernal Vidal A, Mayol Belda JM, Mengual Verdú E. Lateral rectus muscle biopsy as diagnosis of unknown metastatic breast cancer. *Arch la Soc Española Oftalmol (English Ed)*. 2019;94(4):192-195. doi:10.1016/j.oftale.2018.09.008
233. Kagusa H, Mizobuchi Y, Nakajima K, Fujihara T, Bando Y, Takagi Y. Metastatic tumor to the orbital cavity from a primary carcinoma of the uterine cervix : a case report. *J Med Investig*. 2019;66(3.4):355-357. doi:10.2152/jmi.66.355

234. Kızıloğlu ÖY, Türköz FP, Gedar ÖMT, Mestanoğlu M, Yapıcıer Ö. Breast carcinoma metastasis to the medial rectus muscle: Case report. *Turkish J Ophthalmol*. 2019;49(3):168-170. doi:10.4274/tjo.galenos.2018.39018
235. Kluska A, Papis-Ubych A, Fijuth J, Loga K, Spsych M, Gottwald L. Intraorbital extraocular metastasis of breast cancer 11 years after mastectomy – case report and review of the literature. *J Obstet Gynaecol (Lahore)*. 2019;39(1):126-128. doi:10.1080/01443615.2018.1455078
236. Kozubowska K, Skorek A, Peksa R. Neuroendocrine tumour metastasis to the orbit. *Endokrynol Pol*. 2019;70(5):455-456. doi:10.5603/EP.a2019.0024
237. Rider AJ, Walsh A, Sollenberger EL, et al. Orbital Pheochromocytoma Metastasis in 2 Patients With Known Pheochromocytoma. *Ophthalmic Plast Reconstr Surg*. 2019;35(6):e131-e134. doi:10.1097/IOP.0000000000001460
238. Sochat MM, Piao J, Poddar N. Hepatocellular Carcinoma with Orbital Metastasis: a Unique Multidisciplinary Case Report. *J Gastrointest Cancer*. 2019;50(4):978-982. doi:10.1007/s12029-018-0159-3
239. Tao Y, Yagi K, Nishimura H, Hara K, Matsubara S, Uno M. Orbitotemporal Bone Cyst of Metastatic Breast Cancer: Case Report and Literature Review. *World Neurosurg*. 2019;130:267-270. doi:10.1016/j.wneu.2019.07.076
240. Yadav D, Singh M, Gupta K, Kaur M, Gupta P. A report of orbital metastasis from a urinary bladder adenocarcinoma. *Indian J Ophthalmol*. 2019;67(8):1377. doi:10.4103/ijo.IJO\_1699\_18
241. Yu Y, Ji X, Li W, Wu C. Orbital metastasis from a gastrointestinal stromal tumor: A case report. *Am J Ophthalmol Case Reports*. 2019;16(January):100528. doi:10.1016/j.ajoc.2019.100528
242. Bacorn C, Lin LK. Rare Signet Ring Cell Adenocarcinoma of the Colon Metastasis to the Orbit. *Case Rep Ophthalmol Med*. 2020;2020(Figure 1):1-3. doi:10.1155/2020/2940579
243. Blohmer M, Zhu L, Atkinson JM, et al. Patient treatment and outcome after breast cancer orbital and periorbital metastases: a comprehensive case series including analysis of lobular versus ductal tumor histology. *Breast Cancer Res*. 2020;22(1):70. doi:10.1186/s13058-020-01309-3
244. El Bakraoui K, El Morabit B. Orbital Metastasis from Triple-Negative Breast Cancer: Case Report and Literature Review. *Case Rep Oncol*. 2020;13(2):1042-1046. doi:10.1159/000509348
245. Halliday LA, Curragh D, Sia PI, Selva D. Pseudocystic appearance of an orbital carcinoid metastasis. *Orbit*. 2020;39(1):41-44. doi:10.1080/01676830.2019.1576739
246. Hoenck H, Conradie W, Conradie M, Coetzee A. Midgut neuroendocrine tumour presenting as orbital metastases. *J Endocrinol Metab Diabetes South Africa*. 2020;25(2):24-27. doi:10.1080/16089677.2020.1722402
247. Long CP, Lu T, Ediriwickrema LS, et al. Colorectal carcinoma presenting in the orbit: mass effect from an uncommon cause. *Orbit*. 2021;40(4):338-341. doi:10.1080/01676830.2020.1787466
248. Madabhavi I, KS S, Dharmarajan Lethika R, et al. Intraconal Metastasis Leading to Diagnosis of Hepatocellular Carcinoma. *Middle East J Dig Dis*. 2019;12(1):48-51. doi:10.15171/mejdd.2020.164
249. Mahuvakar AD, Nair D, Pai PS. Transnasal Endoscopic Resection of the Intraconal Metastases From Renal Cell Carcinoma: a Case Report and Review of Literature. *Indian J Surg Oncol*. 2020;11(S2):318-322. doi:10.1007/s13193-020-01237-w
250. Marotta DA, Jabaay MJ, Zadourian A, Kesserwani H. Bilateral Orbital Metastases Masquerading as Ocular Myasthenia Gravis: A Case Report and Review of the Literature. *Cureus*. 2020;12(7). doi:10.7759/cureus.9105
251. Mian I, Padiernos E, Hassan R, Ghafoor A. Orbital metastases from malignant mesothelioma. *Lancet Oncol*. 2020;21(2):e117. doi:10.1016/S1470-2045(19)30822-8
252. Montejano-Milner R, López-Gaona A, Fernández-Pérez P, Sánchez-Orgaz M, Romero-Martín R, Arbizu-Duralde A. Orbital metastasis: Clinical presentation and survival in a series of 11 cases. *Arch la Soc Española Oftalmol (English Ed)*. 2020;(x x). doi:10.1016/j.oftale.2020.07.014
253. Narayanan N, Padwal U, Gopinathan I, Pathak R, Nair A. Malignant melanoma of the rectum presenting as orbital metastasis. *Indian J Ophthalmol*. 2020;68(11):2620. doi:10.4103/ijo.IJO\_847\_20
254. Pastore MR, D'Aloisio R, Cirigliano G, De Giacinto C, Tognetto D. Orbital metastasis as presenting symptom from a prostatic adenocarcinoma. *Eur J Ophthalmol*. 2020;30(1):NP29-NP32. doi:10.1177/1120672119832182
255. Protopapa M-N, Lagadinou M, Papagiannis T, Gogos CA, Solomou EE. Hepatocellular Carcinoma: An Uncommon Metastasis in the Orbit. *Case Rep Oncol Med*. 2020;2020:1-3. doi:10.1155/2020/7526042
256. Sindoni A, Fama' F, Vinciguerra P, et al. Orbital metastases from breast cancer: A single institution case series. *J Surg Oncol*. 2020;122(2):170-175. doi:10.1002/jso.25927
257. Tsuruta Y, Maeda Y, Kitaguchi Y, et al. A Case of Endonasal Endoscopic Surgery for Intraorbital Metastasis of Gastric Ring Cell Carcinoma. *Ear, Nose Throat J*. Published online July 22, 2020:014556132094337. doi:10.1177/0145561320943372
258. Wada K, Tsuda T, Hanada Y, Maeda Y, Mori K, Nishimura H. A Rare Case of Prostate Carcinoma Metastasis in the Orbital Apex. *Ear, Nose Throat J*. Published online November 20, 2020:014556132097378. doi:10.1177/0145561320973783
259. El-Khazen Dupuis J, Marchand M, Javidi S, Nguyen TQT. Enophthalmos as the Initial Systemic Finding of Undiagnosed Metastatic Breast Carcinoma. *Int Med Case Rep J*. 2021;Volume 14:25-31. doi:10.2147/IMCRJ.S282113
260. Mendia A, Shah CP, Grajo JR, et al. Orbital metastasis of squamous cell cervical cancer: A case report and review of literature. *Gynecol Oncol Reports*. 2021;35(December 2020):100689. doi:10.1016/j.gore.2020.100689
261. Oprean CM, Badau LM, Segarceanu NA, et al. Unilateral Orbital Metastasis as the Unique Symptom in the Onset of Breast Cancer in a Postmenopausal Woman: Case Report and Review of the Literature. *Diagnostics*. 2021;11(4):725. doi:10.3390/diagnostics11040725
262. Razem B, Slimani F. An early orbital metastasis from breast cancer: A case report. *Int J Surg Case Rep*. 2021;78:300-302. doi:10.1016/j.ijscr.2020.12.049
