# Supplementary material for: Orbital Metastases: A Systematic Review of Clinical Characteristics, Management Strategies, and Treatment Outcomes
Source: MDPI journal article supplement (doi:10.3390/cancers14010094), 2021-12-24
Supplement: s1 [file s1]

[illegible]

|                                               |     |     |     |     |     |     |     |     |          |
|-----------------------------------------------|-----|-----|-----|-----|-----|-----|-----|-----|----------|
| Mareshwari et al. – 2002 <sup>92</sup>        | Yes | 8 – Good |
| McCulley et al. – 2002 <sup>93</sup>          | Yes | Yes | Yes | Yes | Yes | No  | No  | Yes | 6 – Good |
| Misra et al. – 2002 <sup>94</sup>             | Yes | Yes | Yes | Yes | Yes | No  | Yes | Yes | 7 – Good |
| Baltogiannis et al. – 2003 <sup>95</sup>      | Yes | Yes | Yes | Yes | Yes | No  | No  | Yes | 6 – Good |
| Fynn-Thompson et al. – 2003 <sup>97</sup>     | Yes | Yes | Yes | Yes | Yes | Yes | No  | Yes | 7 – Good |
| Lekse et al. – 2003 <sup>98</sup>             | Yes | 8 – Good |
| Saleh et al. – 2003 <sup>100</sup>            | Yes | Yes | Yes | Yes | Yes | Yes | No  | Yes | 7 – Good |
| Takemoto et al. – 2003 <sup>101</sup>         | Yes | Yes | Yes | Yes | Yes | No  | No  | Yes | 6 – Good |
| Tehrani et al. – 2003 <sup>102</sup>          | Yes | 8 – Good |
| Chua et al. – 2004 <sup>104</sup>             | Yes | No  | 7 – Good |
| Glazer-Hockstein et al. – 2004 <sup>105</sup> | Yes | Yes | Yes | Yes | Yes | No  | No  | Yes | 6 – Good |
| Lell et al. – 2004 <sup>106</sup>             | Yes | Yes | Yes | Yes | Yes | No  | No  | Yes | 6 – Good |
| Van der Zee et al. – 2004 <sup>107</sup>      | Yes | 8 – Good |
| Zdinak et al. – 2004 <sup>108</sup>           | Yes | 8 – Good |
| Borota et al. – 2005 <sup>109</sup>           | Yes | 8 – Good |
| Challangudia et al. – 2005 <sup>110</sup>     | Yes | No  | Yes | Yes | Yes | Yes | Yes | Yes | 7 – Good |
| Fabi et al. – 2005 <sup>111</sup>             | Yes | 8 – Good |
| Gupta et al. – 2005 <sup>112</sup>            | Yes | 8 – Good |
| Hart et al. – 2005 <sup>113</sup>             | Yes | Yes | Yes | Yes | Yes | No  | No  | Yes | 6 – Good |
| Konuk et al. – 2005 <sup>114</sup>            | Yes | 8 – Good |
| Mohadjer et al. – 2005 <sup>115</sup>         | Yes | 8 – Good |
| Puglisi et al. – 2005 <sup>116</sup>          | Yes | Yes | Yes | Yes | Yes | Yes | No  | Yes | 7 – Good |
| Aralikatti et al. – 2006 <sup>117</sup>       | Yes | Yes | Yes | Yes | Yes | No  | Yes | Yes | 7 – Good |
| Lee et al. – 2006 <sup>118</sup>              | Yes | 8 – Good |
| Oida et al. – 2006 <sup>120</sup>             | Yes | 8 – Good |
| Sharma et al. – 2006 <sup>122</sup>           | Yes | Yes | Yes | Yes | Yes | Yes | No  | Yes | 7 – Good |
| Singh et al. – 2006 <sup>123</sup>            | Yes | Yes | Yes | Yes | Yes | Yes | No  | Yes | 7 – Good |
| Solari et al. – 2006 <sup>124</sup>           | Yes | 8 – Good |
| Tumuluri et al. – 2006 <sup>125</sup>         | Yes | 8 – Good |
| Yunker et al. – 2006 <sup>126</sup>           | Yes | Yes | Yes | Yes | Yes | No  | No  | Yes | 6 – Good |
| Char et al. – 2007 <sup>127</sup>             | Yes | Yes | Yes | Yes | Yes | No  | No  | Yes | 6 – Good |
| Gerencer et al. – 2007 <sup>128</sup>         | Yes | 8 – Good |
| Isshiki et al. – 2007 <sup>129</sup>          | Yes | 8 – Good |
| Lin et al. – 2007 <sup>130</sup>              | Yes | 8 – Good |
| Mani et al. – 2007 <sup>131</sup>             | Yes | Yes | Yes | Yes | Yes | Yes | No  | Yes | 7 – Good |
| Su et al. – 2007 <sup>132</sup>               | Yes | 8 – Good |
| Talwar et al. – 2007 <sup>133</sup>           | Yes | Yes | Yes | Yes | Yes | No  | No  | Yes | 6 – Good |
| Uluocak et al. – 2007 <sup>135</sup>          | Yes | 8 – Good |
| Alsuhaibani et al. – 2008 <sup>136</sup>      | Yes | 8 – Good |
| Hatton et al. – 2008 <sup>137</sup>           | Yes | 8 – Good |
| Henning et al. – 2008 <sup>138</sup>          | Yes | 8 – Good |
| Hirunwiwatkul et al. – 2008 <sup>139</sup>    | Yes | 8 – Good |
| Kiratli et al. – 2008 <sup>140</sup>          | Yes | Yes | Yes | Yes | Yes | Yes | No  | Yes | 7 – Good |
| Kuo et al. – 2008 <sup>141</sup>              | Yes | Yes | Yes | Yes | Yes | Yes | No  | Yes | 7 – Good |
| Milman et al. – 2008 <sup>142</sup>           | Yes | 8 – Good |
| Mudiyansele et al. – 2008 <sup>143</sup>      | Yes | Yes | Yes | Yes | Yes | No  | No  | Yes | 6 – Good |

[illegible]

[illegible]

|                                        |     |     |     |     |     |     |     |     |          |
|----------------------------------------|-----|-----|-----|-----|-----|-----|-----|-----|----------|
| Madabhavi et al. – 2020 <sup>248</sup> | Yes | 8 – Good |
| Mahuvakar et al. – 2020 <sup>249</sup> | Yes | 8 – Good |
| Marotta et al. – 2020 <sup>250</sup>   | Yes | 8 – Good |
| Mian et al. – 2020 <sup>251</sup>      | Yes | No  | 7 – Good |
| Narayanan et al. – 2020 <sup>253</sup> | Yes | Yes | Yes | Yes | Yes | Yes | No  | Yes | 7 – Good |
| Pastore et al. – 2020 <sup>254</sup>   | Yes | 8 – Good |
| Protopapa et al. – 2020 <sup>255</sup> | Yes | Yes | Yes | Yes | Yes | Yes | No  | Yes | 7 – Good |
| Tsuruta et al. – 2020 <sup>257</sup>   | Yes | Yes | Yes | Yes | Yes | Yes | No  | Yes | 7 – Good |
| Wada et al. – 2020 <sup>258</sup>      | Yes | 8 – Good |
| Mendia et al. – 2021 <sup>260</sup>    | Yes | 8 – Good |
| Oprean et al. – 2021 <sup>261</sup>    | Yes | 8 – Good |
| Razem et al. – 2021 <sup>262</sup>     | Yes | Yes | Yes | Yes | Yes | Yes | No  | Yes | 7 – Good |

References found in Supplementary File 2.

| <b>Joanna Briggs Institute Checklist for Case Series – Criteria</b>                                              |
|------------------------------------------------------------------------------------------------------------------|
| 1. Were there clear criteria for inclusion in the case series?                                                   |
| 2. Was the condition measured in a standard, reliable way for all participants included in the case series?      |
| 3. Were valid methods used for identification of the condition for all participants included in the case series? |
| 4. Did the case series have consecutive inclusion of participants?                                               |
| 5. Did the case series have complete inclusion of participants?                                                  |
| 6. Was there clear reporting of the demographics of the participants in the study?                               |
| 7. Was there clear reporting of clinical information of the participants?                                        |
| 8. Were the outcomes or follow up results of cases clearly reported?                                             |
| 9. Was there clear reporting of the presenting site(s)/clinic(s) demographic information?                        |
| 10. Was statistical analysis appropriate?                                                                        |
| <b>Responses Options:</b> Yes, No, Unclear, Not Applicable (NA)                                                  |
| <b>Quality Rating:</b> Poor 0 – 3; Fair 4 – 7; Good 8 – 10                                                       |

| <b>Study (Case Series)</b>              | <b>1</b> | <b>2</b> | <b>3</b> | <b>4</b> | <b>5</b> | <b>6</b> | <b>7</b> | <b>8</b> | <b>9</b> | <b>10</b> | <b>Appraisal</b> |
|-----------------------------------------|----------|----------|----------|----------|----------|----------|----------|----------|----------|-----------|------------------|
| Mortada et al. – 1968 <sup>3</sup>      | Yes      | No       | NA        | 8 – Good         |
| Ashton et al. – 1974 <sup>5</sup>       | Yes      | No       | NA        | 8 – Good         |
| Huh et al. – 1974 <sup>6</sup>          | Yes      | Yes      | Yes      | Yes      | No       | Yes      | Yes      | Yes      | Yes      | NA        | 8 – Good         |
| Riddle et al. – 1982 <sup>21</sup>      | Yes      | No       | NA        | 8 – Good         |
| Tertzakian et al. – 1982 <sup>22</sup>  | Yes      | No       | NA        | 8 – Good         |
| Mortada et al. – 1984 <sup>24</sup>     | Yes      | No       | NA        | 8 – Good         |
| Bond et al. – 1986 <sup>27</sup>        | Yes      | No       | NA        | 8 – Good         |
| Stefanyshyn et al. – 1987 <sup>36</sup> | Yes      | No       | NA        | 8 – Good         |
| Boldt et al. – 1988 <sup>37</sup>       | Yes      | NA        | 9 – Good         |
| Orcutt et al. – 1988 <sup>38</sup>      | Yes      | No       | NA        | 8 – Good         |
| Jacobs et al. – 1988 <sup>39</sup>      | Yes      | Yes      | Yes      | Yes      | Yes      | No       | Yes      | Yes      | Yes      | NA        | 8 – Good         |
| Shields et al. – 1988 <sup>40</sup>     | Yes      | No       | NA        | 8 – Good         |
| Capone et al. – 1990 <sup>44</sup>      | Yes      | No       | NA        | 8 – Good         |
| Goldberg et al. – 1990 <sup>46</sup>    | Yes      | NA        | 9 – Good         |
| Shetlar et al. – 1990 <sup>47</sup>     | Yes      | No       | NA        | 8 – Good         |
| Tijl et al. – 1992 <sup>56</sup>        | Yes      | NA        | 9 – Good         |
| Fan et al. – 1995 <sup>66</sup>         | Yes      | No       | NA        | 8 – Good         |
| Char et al. – 1997 <sup>71</sup>        | Yes      | Yes      | Yes      | Yes      | Yes      | No       | Yes      | Yes      | Yes      | Yes       | 9 – Good         |
| Shields et al. – 2001 <sup>91</sup>     | Yes      | Yes      | Yes      | Yes      | Yes      | No       | Yes      | Yes      | Yes      | NA        | 8 – Good         |
| Baroody et al. – 2003 <sup>96</sup>     | Yes      | Yes      | Yes      | Yes      | Yes      | No       | Yes      | Yes      | Yes      | NA        | 8 – Good         |
| Holland et al. – 2003 <sup>98</sup>     | Yes      | Yes      | Yes      | Yes      | Yes      | No       | Yes      | Yes      | Yes      | NA        | 8 – Good         |
| Zografos et al. – 2003 <sup>103</sup>   | Yes      | No       | NA        | 8 – Good         |
| Mehta et al. – 2006 <sup>119</sup>      | Yes      | Yes      | Yes      | Yes      | Yes      | No       | Yes      | Yes      | Yes      | Yes       | 9 – Good         |
| Schick et al. – 2006 <sup>121</sup>     | Yes      | No       | NA        | 8 – Good         |

|                                               |     |     |     |     |     |     |     |     |     |     |          |
|-----------------------------------------------|-----|-----|-----|-----|-----|-----|-----|-----|-----|-----|----------|
| Torres et al. – 2007 <sup>134</sup>           | Yes | No  | NA  | 8 – Good |
| Pitts et al. – 2008 <sup>145</sup>            | Yes | No  | NA  | 8 – Good |
| Valenzuela et al. – 2009 <sup>155</sup>       | Yes | Yes | Yes | Yes | Yes | No  | Yes | Yes | No  | Yes | 8 – Good |
| Eldesouky et al. – 2014 <sup>191</sup>        | Yes | No  | NA  | 8 – Good |
| Greene et al. – 2014 <sup>192</sup>           | Yes | NA  | 9 – Good |
| Magliozzi et al. – 2015 <sup>197</sup>        | Yes | Yes | Yes | Yes | Yes | No  | Yes | Yes | Yes | Yes | 9 – Good |
| Magrath et al. – 2015 <sup>198</sup>          | Yes | No  | NA  | 8 – Good |
| Geske et al. – 2017 <sup>209</sup>            | Yes | No  | NA  | 8 – Good |
| Das et al. – 2018 <sup>218</sup>              | Yes | NA  | 9 – Good |
| Espinoza-Barberi et al. – 2019 <sup>231</sup> | Yes | No  | NA  | 8 – Good |
| Rider et al. – 2019 <sup>237</sup>            | Yes | No  | NA  | 8 – Good |
| Blohmer et al. – 2020 <sup>243</sup>          | Yes | Yes | Yes | Yes | No  | No  | Yes | Yes | Yes | Yes | 8 – Good |
| Montejano-Milner et al. – 2020 <sup>252</sup> | Yes | No  | Yes | 9 – Good |
| Sindoni et al. – 2020 <sup>256</sup>          | Yes | Yes | Yes | Yes | Yes | No  | Yes | Yes | Yes | Yes | 9 – Good |
| El-Khazen Dupuis et al. – 2021 <sup>259</sup> | Yes | No  | NA  | 8 - Good |

References found in Supplementary File 2.
